# Supplementary material for: Primary bacteraemia is associated with a higher mortality risk compared with pulmonary and intra-abdominal infections in patients with sepsis: a prospective observational cohort study
Source: PubMed Central journal article supplement — BMJ Open. 2015 Jan 6;5(1):e006616. doi: 10.1136/bmjopen-2014-006616 (PMC4289738; doi:10.1136/bmjopen-2014-006616), 2015-01-06
Supplement: bmjopen-2014-006616.draft_revisions.pdf [file bmjopen-2014-006616.draft_revisions.pdf]

# BMJ Open

## Primary bacteremia is associated with a higher mortality risk in patients with sepsis: a prospective observational cohort study

|                                 |                                                                                                                                                                                                                                                                                                                                                                                                                                                                                                                                                                                                                                                                                                                                                                                                                                                                          |
|---------------------------------|--------------------------------------------------------------------------------------------------------------------------------------------------------------------------------------------------------------------------------------------------------------------------------------------------------------------------------------------------------------------------------------------------------------------------------------------------------------------------------------------------------------------------------------------------------------------------------------------------------------------------------------------------------------------------------------------------------------------------------------------------------------------------------------------------------------------------------------------------------------------------|
| Journal:                        | <i>BMJ Open</i>                                                                                                                                                                                                                                                                                                                                                                                                                                                                                                                                                                                                                                                                                                                                                                                                                                                          |
| Manuscript ID:                  | bmjopen-2014-006616                                                                                                                                                                                                                                                                                                                                                                                                                                                                                                                                                                                                                                                                                                                                                                                                                                                      |
| Article Type:                   | Research                                                                                                                                                                                                                                                                                                                                                                                                                                                                                                                                                                                                                                                                                                                                                                                                                                                                 |
| Date Submitted by the Author:   | 11-Sep-2014                                                                                                                                                                                                                                                                                                                                                                                                                                                                                                                                                                                                                                                                                                                                                                                                                                                              |
| Complete List of Authors:       | Mansur, Ashham; University Medical Center, Georg August University, Department of Anaesthesiology<br>Klee, Yvonne; University Medical Center, Georg August University, Department of Anaesthesiology<br>Popov, Aron; Royal Brompton and Harefield Hospital, Department of Cardiothoracic Transplantation & Mechanical Support<br>Erlenwein, Joachim; University Medical Center, Georg August University, Department of Anaesthesiology<br>Ghadimi, Michael; University Medical Center, Georg August University, Department of General and Visceral Surgery<br>Beissbarth, Tim; University Medical Center, Georg August University, Department of Medical Statistics<br>Bauer, Martin; University Medical Center, Georg August University, Department of Anaesthesiology<br>Hinz, José; University Medical Center, Georg August University, Department of Anaesthesiology |
| <b>Primary Subject Heading</b>: | Intensive care                                                                                                                                                                                                                                                                                                                                                                                                                                                                                                                                                                                                                                                                                                                                                                                                                                                           |
| Secondary Subject Heading:      | Anaesthesia                                                                                                                                                                                                                                                                                                                                                                                                                                                                                                                                                                                                                                                                                                                                                                                                                                                              |
| Keywords:                       | Adult intensive & critical care < INTENSIVE & CRITICAL CARE, Adult surgery < SURGERY, Adult anaesthesia < ANAESTHETICS                                                                                                                                                                                                                                                                                                                                                                                                                                                                                                                                                                                                                                                                                                                                                   |
|                                 |                                                                                                                                                                                                                                                                                                                                                                                                                                                                                                                                                                                                                                                                                                                                                                                                                                                                          |

SCHOLARONE™  
Manuscripts

1  
2  
3 **Primary bacteremia is associated with a higher mortality risk in patients with**  
4 **sepsis: a prospective observational cohort study**  
5  
6  
7

8 Ashham Mansur<sup>1\*</sup>, Yvonne Klee<sup>1</sup>, Aron Frederik Popov<sup>2</sup>, Joachim Erlenwein<sup>1</sup>, Michael  
9 Ghadimi<sup>3</sup>, Tim Beissbarth<sup>4</sup>, Martin Bauer<sup>1</sup>, José Hinz<sup>1</sup>  
10  
11

12  
13  
14 <sup>1</sup>Department of Anesthesiology, University Medical Center, Georg August  
15 University, D-37075 Goettingen, Germany  
16

17  
18 <sup>2</sup>Department of Cardiothoracic Transplantation & Mechanical Support, Royal  
19 Brompton and Harefield Hospital, Harefield, Hill End Road, UB9 6JH London,  
20 United Kingdom  
21

22 <sup>3</sup>Department of General and Visceral Surgery, University Medical Center, Georg  
23 August University, D-37075 Goettingen, Germany  
24

25 <sup>4</sup>Department of Medical Statistics, University Medical Center, Georg August  
26 University, D-37075 Goettingen, Germany  
27  
28  
29  
30  
31

32 **\*Corresponding author:**  
33

34 Dr. Ashham Mansur  
35

36 Medical consultant  
37

38 Dep. of Anesthesiology  
39

40 Georg-August-University, University Medical Center  
41

42 Robert-Koch-Str. 40, 37099 Goettingen, Germany  
43

44 Fon: +49 551 39 7819  
45

46 Fax: +49 551 39 13886  
47

48 E-mail: [ashham.mansur@med.uni-goettingen.de](mailto:ashham.mansur@med.uni-goettingen.de)  
49  
50  
51

52 **Keywords** Pulmonary infection; intra-abdominal infection; intensive care unit;  
53 organ failure marker; SOFA scores  
54

55 **Word count** 2375  
56  
57  
58  
59  
60

## ABSTRACT

**Objective:** to investigate whether common infection foci (pulmonary, intra-abdominal and primary bacteremia) are associated with variations in the mortality risk in sepsis patients.

**Design:** Prospective, observational, blinded cohort study.

**Setting:** Three intensive care units (ICU) of a university medical center

**Participants:** 327 adult Caucasian patients with sepsis of pulmonary, intra-abdominal and primary bacteremia origins participated in this study.

**primary and secondary outcome measures:** The patients were followed up for 90 days, and mortality was recorded as the primary outcome variable. Sepsis-related organ failure assessment (SOFA) scores were evaluated at the onset of sepsis and throughout the observational period as secondary outcome variables to monitor organ failure.

**Results:** A total of 327 critically ill patients with sepsis were enrolled in this study. The 90-day mortality risk was significantly higher among patients with primary bacteremia than among those with pulmonary and intra-abdominal foci ( $p=0.0208$ ). To exclude the effects of several baseline variables, we performed a multivariate Cox regression analysis. Primary bacteremia remained a significant co-variate for mortality in the multivariate analysis (hazard ratio, 2.20 [95% CI, 1.2-4.0];  $p=0.0098$ ). During their stay in the ICU, the patients with primary bacteremia presented significantly higher SOFA scores than those of the patients with other infection foci ( $p=0.0002$ ). An analysis of organ-specific SOFA sub-scores revealed a significantly higher SOFA-renal score among the patients with primary bacteremia compared with other infection foci ( $p=0.0028$ ); the primary bacteremia patients required significantly more renal replacement therapy ( $p<0.0001$ ).

1  
2  
3 **Conclusions:** These results indicate that sepsis patients with primary bacteremia present a  
4 higher mortality risk compared with that of sepsis patients of pulmonary or intra-abdominal  
5 origins. These results should be assessed in sepsis patients from larger, independent cohorts.  
6  
7  
8  
9  
10  
11  
12  
13  
14  
15  
16  
17  
18  
19  
20  
21  
22  
23  
24  
25  
26  
27  
28  
29  
30  
31  
32  
33  
34  
35  
36  
37  
38  
39  
40  
41  
42  
43  
44  
45  
46  
47  
48  
49  
50  
51  
52  
53  
54  
55  
56  
57  
58  
59  
60

For peer review only

### Strengths and limitations of this study

- This is the first study to evaluate mortality risk among sepsis patients with primary bloodstream infections compared with those with respiratory or intra-abdominal infections over an observational period of 90 days.
- The strengths of our study include that it is the first to investigate organ-specific manifestations associated with common sepsis infection sites (respiratory, intra-abdominal and bloodstream) by quantifying SOFA scores and evaluating the requirements for organ support in the ICU.
- The limitation of this study is the relative small number of patients.

## INTRODUCTION

Sepsis is defined as a systemic inflammatory response that occurs during severe infection[1-3]. Sepsis affects more than 750,000 patients in the United States each year and remains one of the leading causes of death worldwide[4]. Respiratory, intra-abdominal, urinary and primary bloodstream infections make up 80% of all infection sites[5]. According to epidemiological data, the lung is the most common site of infection, followed by the abdomen and the blood[2].

Pneumonia, hospital-acquired pneumonia (HAP), ventilator-associated pneumonia (VAP) and subsequent sepsis remain important causes of morbidity and mortality in critically ill patients despite advances in antimicrobial therapy, better supportive care modalities, and a wide range of preventive measures[6-8]. Hospital-acquired pneumonia (HAP) is the most frequent infection in surgical intensive care units (ICUs) and is defined as a pulmonary infection that was not incubating at the time of admission and occurred at least 48 h after hospital admission. Ventilator-associated pneumonia (VAP) is defined as either a pulmonary infection arising more than 48 h after tracheal intubation with no evidence of pneumonia at the time of intubation or the diagnosis of a new pulmonary infection if the initial ICU admission was due to pneumonia[9].

Intra-abdominal infections are a common cause of sepsis. They comprise a markedly heterogeneous group of infectious processes that share an anatomical site of origin between the diaphragm and the pelvis[10]. Their clinical course is dictated by a number of infection-related factors, including the microbiology of the infection, the anatomical location, the degree of localization, and the presence of correctable anatomical derangements involving intra-abdominal viscera. Intra-abdominal infections may progress to sepsis[11 12]. Typically, patients with intra-abdominal infections in the surgical ICU develop secondary peritonitis as a

1  
2  
3 result of the microbial infection of the peritoneal space following perforation, abscess  
4 formation, ischemic necrosis, or a penetrating injury of the intra-abdominal contents[10].  
5  
6

7  
8 Bloodstream infections (BSIs) are one of the leading causes of death due to nosocomial  
9 events in the ICU. Immune depression and invasive health care procedures act together to  
10 create a high risk of nosocomial BSIs in critically ill patients[13]. The outcomes of BSIs have  
11 been the focus of many case-control and cohort studies[13-15]. BSIs lead to poor patient  
12 outcomes[14 16], prolonged patient stays in ICU and in the hospital[14 17 18], and substantial  
13 extra costs for the medical system[19 20].  
14  
15  
16  
17  
18  
19  
20

21  
22 Whether the characteristics of the infection, infection site and pathogenic organism  
23 independently affect the outcome in patients with sepsis remains debated. Whereas previous  
24 studies have shown an independent significant contribution of the infection site and the  
25 pathogenic organism to the survival of sepsis patients[21], recent observations were unable to  
26 detect any significant impact of the infection site on mortality among patients with sepsis[22].  
27  
28  
29  
30  
31  
32  
33

34 This study aimed to explore whether common sepsis infection sites: respiratory, intra-  
35 abdominal and bloodstream infections are associated with changes in the survival rate (90-  
36 day) among patients with sepsis in a representative university medical center, where patients  
37 are treated according to the most recent sepsis guidelines.  
38  
39  
40  
41  
42  
43  
44  
45  
46  
47  
48  
49  
50  
51  
52  
53  
54  
55  
56  
57  
58  
59  
60

## MATERIALS AND METHODS

### Patients

Adult Caucasian patients admitted to the University Medical Center Goettingen (UMG) ICUs between April 2012 and May 2013 were screened daily according to the American College of Chest Physicians/Society of Critical Care Medicine (ACCP/SCCM) criteria for sepsis, severe sepsis, or septic shock[23 24]. Patients were enrolled if they presented sepsis of a respiratory, intra-abdominal or primary bloodstream origin. Caucasian origin was assessed by questioning the patients, their next of kin or their legal representatives. The patient exclusion criteria were described previously[25 26]. The study was approved by the University of Goettingen ethics committee, Goettingen, Germany (15/1/12) and conformed to the Declaration of Helsinki ethical principles (Seoul, 2008). For each patient, written informed consent was obtained from either the patient or his/her legal representative.



### Data collection

Patients were followed up for 90 days, and mortality risk was recorded as the primary outcome variable. Sequential Organ Failure Assessment (SOFA)[27] and Acute Physiology and Chronic Health Evaluation (APACHE) II[28] scores were evaluated at the onset of sepsis. Organ function was reassessed over the 28 days on the ICU monitor morbidity as previously described[25]. Organ failure, organ support requirement and length of ICU-stay were recorded as secondary outcome variables.

### Statistical analyses

Statistical analyses were performed using the Statistica (StatSoft, Tulsa, Oklahoma, USA, version 10) software program. Based on contingency tables, significance was calculated using two-sided Fisher's exact or chi-square tests, as appropriate. Two continuous variables were compared using the Mann-Whitney test. Time-to-event data were compared using the log-rank test from the Statistica package survival analysis. For variables identified as significant in the univariate survival analysis (respiratory, intra-abdominal and primary bacteremia infections), potential confounders (age, gender and BMI) and covariates that varied at baseline (diabetes mellitus (IDDM) and history of cancer), we performed multivariate cox regression models against survival. A p-value less than 0.05 was considered significant.

## RESULTS

### Study population

A total of 327 adult Caucasian patients with sepsis were enrolled in this study. At enrollment, 61% of the patients had a pulmonary infection; 32% suffered from an intra-abdominal infection; and 7% presented a primary bloodstream infection (Table 1). The age of the patients ranged from 19 to 91 years (median, 65 years). At baseline, the patient disease severity SOFA and APACHE II scores were  $9.3\pm 4.0$  and  $21.5\pm 7.3$ , respectively (Table 1). Comorbidities included hypertension, myocardial infarction history, chronic obstructive pulmonary disease (COPD), renal dysfunction, non-insulin-dependent diabetes mellitus, insulin-dependent diabetes mellitus, chronic liver diseases, history of cancer, and history of stroke (Table 1).

**Table 1. Patient baseline characteristics with regard to the infection site**

|                                  | All<br>n=327   | Pulmonary<br>n=198 | Intra-abdominal<br>n=105 | Bloodstream<br>n=24 | p-value |
|----------------------------------|----------------|--------------------|--------------------------|---------------------|---------|
| Age, mean $\pm$ SD               | 62 $\pm$ 15    | 61 $\pm$ 15        | 65 $\pm$ 13              | 60 $\pm$ 16         | 0.2426  |
| Male, %                          | 67%            | 70                 | 61                       | 62                  | 0.2614  |
| Body-mass index, mean $\pm$ SD   | 27 $\pm$ 6     | 27 $\pm$ 7         | 27 $\pm$ 5               | 29 $\pm$ 5          | 0.0885  |
| SOFA score, mean $\pm$ SD        | 9.3 $\pm$ 4.0  | 9.4 $\pm$ 3.6      | 8.9 $\pm$ 4.7            | 10.5 $\pm$ 5.1      | 0.3099  |
| APACHE II score, mean $\pm$ SD   | 21.5 $\pm$ 7.3 | 21.8 $\pm$ 6.8     | 20.6 $\pm$ 8.1           | 22.8 $\pm$ 7.6      | 0.3538  |
| Organ support, %                 |                |                    |                          |                     |         |
| Mechanical ventilation           | 85             | 90                 | 74                       | 87                  | 0.0008  |
| Use of vasopressor               | 64             | 62                 | 65                       | 70                  | 0.6778  |
| Renal-replacement therapy        | 8              | 7                  | 9                        | 20                  | 0.0781  |
| Comorbidities, %                 |                |                    |                          |                     |         |
| Hypertension                     | 57             | 55                 | 59                       | 66                  | 0.5395  |
| History of myocardial infarction | 8              | 9                  | 7                        | 8                   | 0.9087  |
| COPD                             | 17             | 17                 | 17                       | 16                  | 0.9880  |
| Renal dysfunction                | 11             | 10                 | 9                        | 25                  | 0.0857  |
| Diabetes mellitus (NIDDM)        | 9              | 10                 | 8                        | 8                   | 0.8928  |
| Diabetes mellitus (IDDM)         | 11             | 8                  | 11                       | 33                  | 0.0015  |
| Chronic liver diseases           | 5              | 3                  | 8                        | 8                   | 0.1538  |
| History of cancer                | 18             | 15                 | 30                       | 0                   | 0.0003  |
| History of stroke                | 6              | 8                  | 4                        | 0                   | 0.2192  |

The data are presented as the mean $\pm$ SD or percentages.

**Disease severity at the onset of sepsis**

There were no differences regarding age, gender, or body mass index among the three groups. Moreover, no differences were found in the SOFA and APACHE II scores with regard to the infection sites at the onset of sepsis. The patients in the intra-abdominal infections group required significantly less mechanical ventilation compared with the other groups ( $p=0.0008$ ). The patients in the bloodstream infection group suffered significantly more from insulin-dependent diabetes mellitus ( $p=0.0015$ ) compared with the other groups, whereas the patients in the bloodstream infection group were significantly less likely to report a history of cancer ( $p=0.0003$ ) (Table 1).

## Mortality analysis

According to Kaplan-Meier survival analysis, the mortality risk increased during the 90-day observation period among bloodstream infection patients ( $p=0.0208$ ). Analysis of the 28-day mortality revealed that the patients in the bloodstream infection group were at a significantly increased risk of death compared with that of the other groups ( $p=0.0012$ ) (Table 2). Furthermore, 90-day mortality analysis indicated a higher incidence of death among the patients in the bloodstream infection group, although this finding was not significant ( $p=0.0544$ ).

**Table 2. Disease progression with regard to infection site**

|                              | All<br>n=327 | Pulmonary<br>n=198 | Intra-abdominal<br>n=105 | Bloodstream<br>n=24 | p-value |
|------------------------------|--------------|--------------------|--------------------------|---------------------|---------|
| SOFA                         | 6.9±3.6      | 7.3±3.4            | 5.8±3.5                  | 8.5±4.7             | 0.0002  |
| SOFA-Subscores               |              |                    |                          |                     |         |
| SOFA-Respiratory             | 1.9±0.7      | 2.2±0.6            | 1.5±0.7                  | 1.9±0.9             | <0.0001 |
| SOFA-Cardiovascular          | 1.5±0.9      | 1.5±0.9            | 1.3±0.9                  | 1.7±1.2             | 0.4567  |
| SOFA-Central nervous system  | 1.8±1.1      | 2.1±1.0            | 1.4±1.0                  | 2.0±1.2             | <0.0001 |
| SOFA-Renal                   | 0.8±1.1      | 0.8±1.1            | 0.7±1.0                  | 1.6±1.4             | 0.0028  |
| SOFA-Coagulation             | 0.3±0.5      | 0.3±0.6            | 0.2±0.5                  | 0.6±0.8             | 0.4662  |
| SOFA-Hepatic                 | 0.4±0.7      | 0.3±0.6            | 0.5±0.8                  | 0.5±0.6             | 0.0030  |
| Organ support*, %            |              |                    |                          |                     |         |
| Mechanical ventilation       |              | 85                 | 62                       | 76                  | <0.0001 |
| Use of vasopressor           |              | 54                 | 45                       | 49                  | 0.8355  |
| Renal replacement therapy    |              | 11                 | 12                       | 29                  | 0.0069  |
| Length of stay in ICU (days) | 18±15        | 17±14              | 20±16                    | 16±13               | 0.5061  |
| Mortality analysis, %:       |              |                    |                          |                     |         |
| Death by day 28              | 94 (28)      | 64 (32)            | 18 (17)                  | 12 (50)             | 0.0012  |
| Death by day 90              | 118 (36)     | 70 (35)            | 34 (32)                  | 14 (58)             | 0.0544  |

The data are presented as the mean±SD or percentages.

\*Based on the total number of observations during the follow-up period.

## Multivariate analysis

To exclude the effects of various baseline variables on survival among the three investigated groups, we performed a multivariate Cox regression analysis. Bacteremia remained a

significant co-variate for mortality in the multivariate analysis (hazard ratio, 2.20 [95% CI, 1.2-4.0]; p=0.0098) (Table 3).

**Table 3. Cox regression analysis**

| Infection site   | Variable                  | Hazard ratio | 95% CI    | p-value |
|------------------|---------------------------|--------------|-----------|---------|
| Pulmonary:       |                           |              |           |         |
|                  | Age                       | 1.02         | 1.00-1.03 | 0.0011  |
|                  | Gender                    | 0.84         | 0.57-1.25 | 0.4003  |
|                  | BMI                       | 1.00         | 0.98-1.03 | 0.5038  |
|                  | Diabetes mellitus (IDDM)  | 1.28         | 0.75-2.17 | 0.3548  |
|                  | History of cancer         | 1.24         | 0.80-1.92 | 0.3227  |
|                  | Pulmonary infection       | 1.11         | 0.76-1.62 | 0.5554  |
| Intra-abdominal: |                           |              |           |         |
|                  | Age                       | 1.02         | 1.00-1.03 | 0.0008  |
|                  | Gender                    | 0.85         | 0.58-1.27 | 0.4511  |
|                  | BMI                       | 1.00         | 0.98-1.03 | 0.5020  |
|                  | Diabetes mellitus (IDDM)  | 1.26         | 0.75-2.13 | 0.3737  |
|                  | History of cancer         | 1.32         | 0.85-2.05 | 0.2090  |
|                  | Intra-abdominal infection | 0.67         | 0.45-1.01 | 0.0589  |
| Bloodstream:     |                           |              |           |         |
|                  | Age                       | 1.02         | 1.00-1.03 | 0.0008  |
|                  | Gender                    | 0.84         | 0.57-1.25 | 0.4018  |
|                  | BMI                       | 1.00         | 0.97-1.03 | 0.6464  |
|                  | Diabetes mellitus (IDDM)  | 1.06         | 0.61-1.85 | 0.8173  |
|                  | History of cancer         | 1.34         | 0.86-2.09 | 0.1910  |
|                  | Bloodstream infection     | 2.20         | 1.21-4.02 | 0.0098  |

### Disease severity

During the observational period, the bloodstream infection patients presented significantly higher SOFA scores compared with those of patients in the other groups (p=0.0002) (Table 2). Four of the six organ-specific SOFA scores varied significantly among the study groups (respiratory, central nervous system (CNS), renal and hepatic). The patients in the pulmonary infection group presented higher SOFA-respiratory scores compared with those of the other groups (p<0.0001), and together with the patients in the bloodstream infection group, required more mechanical ventilation (p<0.0001). The patients in the pulmonary and bloodstream groups presented higher SOFA-CNS scores compared with those of patients in the intra-abdominal infection group (p<0.0001). Analysis of the SOFA-renal scores indicated that the patients in the bloodstream infection group presented higher SOFA-renal scores over the

study period in the ICU ( $p=0.0028$ ). They also required significantly more renal replacement therapy ( $p<0.0069$ ). The SOFA-hepatic score was significantly higher in the intra-abdominal and infection groups compared with the pulmonary infection group ( $p=0.0030$ ).

Additionally, the gram-negative infection rate was significantly higher in the patients from the pulmonary infection group (75%) compared with those whose sepsis had intra-abdominal and bloodstream infection origins (57% and 54%, respectively;  $p=0.0026$ ) (Table 4).

**Table 4. Infection types over the observational period**

| Infection site | Respiratory | Abdominal | Bloodstream | p-value |
|----------------|-------------|-----------|-------------|---------|
| Infection type |             |           |             |         |
| Gram-negative  | 75%         | 57%       | 54%         | 0.0026  |
| Gram-positive  | 78%         | 84%       | 79%         | 0.5142  |
| Fungal         | 52%         | 76%       | 42%         | <0.0001 |
| Virus          | 0.08%       | 0.06%     | 0.13%       | 0.4941  |

Furthermore, septic patients with intra-abdominal infections presented a higher incidence of fungal infections (76%) compared with those of patients in the pulmonary and bloodstream infection groups (52% and 42%, respectively;  $p<0.0001$ ) (Table 4).

## DISCUSSION

The present study addressed whether common infection sites among patients with sepsis are associated with the survival rate.

The primary endpoint, the mortality risk within 90 days of the onset of sepsis, was significantly higher in patients with primary bloodstream infections compared with those with respiratory or intra-abdominal infections (Fig. 1). Primary bacteremia remained a significant co-variate for mortality in the multivariate analysis (Table 3).

According to the SOFA and APACHE II scores, infection site was not associated with the acute-illness severity at the onset of sepsis (Table 1). We believe that the similarity in SOFA and APACHE II scores at sepsis onset among the three groups can be attributed to the phenotypic heterogeneity of sepsis. This heterogeneity is influenced by many factors, including the pathogenic organism responsible for the infection and the amount of time elapsed since the onset of infection, as well as other individual parameters, such as co-morbidities and genetic makeup.

The significant result of this study with respect to mortality risk within 90 days was that the rate of mortality (58%) was higher among patients with primary bloodstream infections, and this result is in line with the results of several investigations showing similar mortality rates among patients with nosocomial bloodstream infections[13 29]. Moreover, our study supplements the work of previous investigations by evaluating a longer-term end point (90 days) because sepsis patients continue to be at an increased risk of mortality, even after ICU/hospital discharge[30].

The strengths of our study include that it is the first to investigate organ-specific manifestations associated with common sepsis infection sites (respiratory, intra-abdominal and bloodstream) by quantifying SOFA scores and evaluating the requirements for organ support in the ICU (Table 2). The more pronounced types of respiratory failure, which are quantified by the SOFA-respiratory score and the need for mechanical ventilation (Table 2),



1  
2  
3 among patients with pulmonary infections is plausible because these patients frequently  
4 present compromised pulmonary function. Patients with primary bacteremia are also at a high  
5 risk of respiratory failure due to systemic inflammatory response syndrome, release of pro-  
6 inflammatory cytokines (such as tumor necrosis factor (TNF), IL-1 and IL-6,[31]) and  
7 recruitment of neutrophils to the lungs, which induces the release of toxic mediators, such as  
8 reactive oxygen species and proteases, thus contributing to lung damage and respiratory  
9 failure[32].

10  
11  
12 The observed severe morbidity, quantified by the SOFA mean score in patients with primary  
13 bloodstream infections, resulted in an increased 28-day mortality rate.

14  
15  
16 We believe that the significant difference in the SOFA-CNS score between the genotypes  
17 (with higher scores in the respiratory and the bloodstream groups) occurred because patients  
18 in these groups required much more mechanical ventilation, causing them to be treated more  
19 frequently with sedating medication, which impacts the CNS and thus affects the SOFA-CNS  
20 score.

21  
22  
23 The observed distinct renal failure among bloodstream infection patients indicated by the  
24 SOFA-renal score, which was accompanied by frequent renal replacement therapy (Table 2),  
25 was in accordance with former observations indicating that bloodstream infections are  
26 associated with a higher incidence of renal failure[33]. The frequent utilization of renal  
27 replacement therapy suggests persistent organ dysfunction, which is a well-known contributor  
28 to sepsis-related mortality and may explain the higher mortality among bloodstream infection  
29 patients observed in our study (Table 2, Fig. 1)[34].

30  
31  
32 The SOFA-hepatic score was higher among patients with intra-abdominal and primary  
33 bloodstream infections compared with patients with pulmonary infections (Table 2). This  
34 result can be attributed to the fact that kupffer cells release several cytokines able to induce  
35 hepatocellular dysfunction in response to endotoxemia in patients with bloodstream  
36 infections[35]. Patients with intra-abdominal infections are also predisposed to develop

1  
2  
3 hepatic imbalances because they are at increased risk of developing secondary bloodstream  
4  
5 infections.

6  
7 To the best of our knowledge, this is the first investigation to evaluate 90-day survival in  
8  
9 common sepsis infection sites (respiratory, intra-abdominal and primary bloodstream). This  
10  
11 study revealed a significantly higher mortality rate among patients with primary bloodstream  
12  
13 infections (58%) compared with patients with respiratory and intra-abdominal infections,  
14  
15 although all patients were treated according to current guidelines for the treatment of sepsis  
16  
17 (Surviving Sepsis Campaign)[36]. Because of this dramatically higher mortality rate among  
18  
19 patients with primary bloodstream sepsis, we believe that future sepsis trials should focus on  
20  
21 this vulnerable group of high-risk patients. Clearly, more appropriate interventions and further  
22  
23 improvements in prevention and care are urgently needed.  
24  
25  
26  
27  
28  
29  
30  
31  
32  
33  
34  
35  
36  
37  
38  
39  
40  
41  
42  
43  
44  
45  
46  
47  
48  
49  
50  
51  
52  
53  
54  
55  
56  
57  
58  
59  
60

1  
2  
3 **Acknowledgments** The authors thank the staff of the ICUs of the Department of  
4 Anesthesiology and the Department of General and Visceral Surgery, all of whom were  
5 involved in patient care and control. The authors also thank Benjamin Liese, Simon Wilmers,  
6 Chang Ho Hong, Sebastian Gerber and Maximillian Steinau for their continuous and devoted  
7 help with collecting data. We acknowledge support by the German Research Foundation  
8 (DFG) and the Open Access Publication Funds of Göttingen University.  
9  
10  
11  
12  
13  
14  
15  
16  
17

18 **Contributors** All authors have contributed to study design, data acquisition (clinical and  
19 experimental), or the analysis and interpretation of data. Specifically, YK performed clinical  
20 data collection and participated in the statistical analysis and interpretation of the data. AP,  
21 JE, MG and MB participated in study design, supervised patient enrollment and clinical data  
22 monitoring and interpreted data. TB contributed to study design and conception and  
23 performed and approved the statistical analyses. AM and JH designed the study, supervised  
24 the sample and data collection, performed analyses, interpreted data and drafted the  
25 manuscript. All authors were involved either in manuscript drafting or revision. All authors  
26 have approved the final version of the manuscript.  
27  
28  
29  
30  
31  
32  
33  
34  
35  
36  
37  
38  
39

40 **Funding** None.

41 **Competing interests** None.  
42  
43  
44  
45  
46

47 **Ethics approval** The study was approved by the University of Goettingen ethics committee,  
48 Goettingen, Germany (15/1/12).  
49  
50  
51  
52  
53  
54  
55  
56  
57  
58  
59  
60

- 1
- 2
- 3 1. Vincent JL, Rello J, Marshall J, et al. International study of the prevalence and outcomes of
- 4 infection in intensive care units. *JAMA : the journal of the American Medical Association*
- 5 2009;**302**(21):2323-9 doi: 10.1001/jama.2009.1754[published Online First: Epub Date] |.
- 6 2. Vincent JL, Sakr Y, Sprung CL, et al. Sepsis in European intensive care units: results of the SOAP
- 7 study. *Critical care medicine* 2006;**34**(2):344-53
- 8 3. O'Brien JM, Jr., Ali NA, Aberegg SK, Abraham E. Sepsis. *The American journal of medicine*
- 9 2007;**120**(12):1012-22 doi: 10.1016/j.amjmed.2007.01.035[published Online First: Epub
- 10 Date] |.
- 11 4. Angus DC, Linde-Zwirble WT, Lidicker J, Clermont G, Carcillo J, Pinsky MR. Epidemiology of severe
- 12 sepsis in the United States: analysis of incidence, outcome, and associated costs of care.
- 13 *Critical care medicine* 2001;**29**(7):1303-10
- 14 5. Alberti C, Brun-Buisson C, Burchardi H, et al. Epidemiology of sepsis and infection in ICU patients
- 15 from an international multicentre cohort study. *Intensive care medicine* 2002;**28**(2):108-21
- 16 doi: 10.1007/s00134-001-1143-z[published Online First: Epub Date] |.
- 17 6. Hospital-acquired pneumonia in adults: diagnosis, assessment of severity, initial antimicrobial
- 18 therapy, and preventive strategies. A consensus statement, American Thoracic Society,
- 19 November 1995. *American journal of respiratory and critical care medicine*
- 20 1996;**153**(5):1711-25 doi: 10.1164/ajrccm.153.5.8630626[published Online First: Epub
- 21 Date] |.
- 22 7. Craven DE, Kunches LM, Kilinsky V, Lichtenberg DA, Make BJ, McCabe WR. Risk factors for
- 23 pneumonia and fatality in patients receiving continuous mechanical ventilation. *The*
- 24 *American review of respiratory disease* 1986;**133**(5):792-6
- 25 8. Niederman MS. Guidelines for the management of respiratory infection: why do we need them,
- 26 how should they be developed, and can they be useful? *Current opinion in pulmonary*
- 27 *medicine* 1996;**2**(3):161-5
- 28 9. American Thoracic S, Infectious Diseases Society of A. Guidelines for the management of adults
- 29 with hospital-acquired, ventilator-associated, and healthcare-associated pneumonia.
- 30 *American journal of respiratory and critical care medicine* 2005;**171**(4):388-416 doi:
- 31 10.1164/rccm.200405-644ST[published Online First: Epub Date] |.
- 32 10. Calandra T, Cohen J, International Sepsis Forum Definition of Infection in the ICUCC. The
- 33 international sepsis forum consensus conference on definitions of infection in the intensive
- 34 care unit. *Critical care medicine* 2005;**33**(7):1538-48
- 35 11. Evans HL, Raymond DP, Pelletier SJ, Crabtree TD, Pruett TL, Sawyer RG. Diagnosis of intra-
- 36 abdominal infection in the critically ill patient. *Current opinion in critical care* 2001;**7**(2):117-
- 37 21
- 38 12. Marshall JC, Innes M. Intensive care unit management of intra-abdominal infection. *Critical care*
- 39 *medicine* 2003;**31**(8):2228-37 doi: 10.1097/01.ccm.0000087326.59341.51[published Online
- 40 First: Epub Date] |.
- 41 13. Garrouste-Orgeas M, Timsit JF, Tafflet M, et al. Excess risk of death from intensive care unit-
- 42 acquired nosocomial bloodstream infections: a reappraisal. *Clinical infectious diseases : an*
- 43 *official publication of the Infectious Diseases Society of America* 2006;**42**(8):1118-26 doi:
- 44 10.1086/500318[published Online First: Epub Date] |.
- 45 14. Pittet D, Tarara D, Wenzel RP. Nosocomial bloodstream infection in critically ill patients. Excess
- 46 length of stay, extra costs, and attributable mortality. *JAMA : the journal of the American*
- 47 *Medical Association* 1994;**271**(20):1598-601
- 48 15. Renaud B, Brun-Buisson C, Group IC-BS. Outcomes of primary and catheter-related bacteremia. A
- 49 cohort and case-control study in critically ill patients. *American journal of respiratory and*
- 50 *critical care medicine* 2001;**163**(7):1584-90 doi: 10.1164/ajrccm.163.7.9912080[published
- 51 Online First: Epub Date] |.
- 52 16. Kleven RM, Edwards JR, Richards CL, Jr., et al. Estimating health care-associated infections and
- 53 deaths in U.S. hospitals, 2002. *Public health reports (Washington, D.C. : 1974)*
- 54 2007;**122**(2):160-6
- 55
- 56
- 57
- 58
- 59
- 60

17. Digiovine B, Chenoweth C, Watts C, Higgins M. The attributable mortality and costs of primary nosocomial bloodstream infections in the intensive care unit. *American journal of respiratory and critical care medicine* 1999;**160**(3):976-81 doi: 10.1164/ajrccm.160.3.9808145[published Online First: Epub Date]].
18. Rello J, Ochagavia A, Sabanes E, et al. Evaluation of outcome of intravenous catheter-related infections in critically ill patients. *American journal of respiratory and critical care medicine* 2000;**162**(3 Pt 1):1027-30 doi: 10.1164/ajrccm.162.3.9911093[published Online First: Epub Date]].
19. Perencevich EN, Stone PW, Wright SB, et al. Raising standards while watching the bottom line: making a business case for infection control. *Infection control and hospital epidemiology : the official journal of the Society of Hospital Epidemiologists of America* 2007;**28**(10):1121-33 doi: 10.1086/521852[published Online First: Epub Date]].
20. Lin MY, Hota B, Khan YM, et al. Quality of traditional surveillance for public reporting of nosocomial bloodstream infection rates. *JAMA : the journal of the American Medical Association* 2010;**304**(18):2035-41 doi: 10.1001/jama.2010.1637[published Online First: Epub Date]].
21. Cohen J, Cristofaro P, Carlet J, Opal S. New method of classifying infections in critically ill patients. *Critical care medicine* 2004;**32**(7):1510-26
22. Zahar JR, Timsit JF, Garrouste-Orgeas M, et al. Outcomes in severe sepsis and patients with septic shock: pathogen species and infection sites are not associated with mortality. *Critical care medicine* 2011;**39**(8):1886-95 doi: 10.1097/CCM.0b013e31821b827c[published Online First: Epub Date]].
23. Bone RC, Balk RA, Cerra FB, et al. Definitions for sepsis and organ failure and guidelines for the use of innovative therapies in sepsis. The ACCP/SCCM Consensus Conference Committee. American College of Chest Physicians/Society of Critical Care Medicine. 1992. *Chest* 2009;**136**(5 Suppl):e28
24. Levy MM, Fink MP, Marshall JC, et al. 2001 SCCM/ESICM/ACCP/ATS/SIS International Sepsis Definitions Conference. *Critical care medicine* 2003;**31**(4):1250-6 doi: 10.1097/01.ccm.0000050454.01978.3b[published Online First: Epub Date]].
25. Mansur A, von Gruben L, Popov AF, et al. The regulatory toll-like receptor 4 genetic polymorphism rs11536889 is associated with renal, coagulation and hepatic organ failure in sepsis patients. *Journal of translational medicine* 2014;**12**:177 doi: 10.1186/1479-5876-12-177[published Online First: Epub Date]].
26. Mansur A, Hinz J, Hillebrecht B, et al. Ninety-day survival rate of patients with sepsis relates to programmed cell death 1 genetic polymorphism rs11568821. *Journal of investigative medicine : the official publication of the American Federation for Clinical Research* 2014;**62**(3):638-43 doi: 10.231/jim.0000000000000059[published Online First: Epub Date]].
27. Vincent JL, de Mendonca A, Cantraine F, et al. Use of the SOFA score to assess the incidence of organ dysfunction/failure in intensive care units: results of a multicenter, prospective study. Working group on "sepsis-related problems" of the European Society of Intensive Care Medicine. *Critical care medicine* 1998;**26**(11):1793-800
28. Knaus WA, Draper EA, Wagner DP, Zimmerman JE. APACHE II: a severity of disease classification system. *Critical care medicine* 1985;**13**(10):818-29
29. Timsit JF, Laupland KB. Update on bloodstream infections in ICUs. *Current opinion in critical care* 2012;**18**(5):479-86 doi: 10.1097/MCC.0b013e328356cefe[published Online First: Epub Date]].
30. Khamsi R. Execution of sepsis trials needs an overhaul, experts say. *Nature medicine* 2012;**18**(7):998-9 doi: 10.1038/nm0712-998b[published Online First: Epub Date]].
31. Martin TR. Lung cytokines and ARDS: Roger S. Mitchell Lecture. *Chest* 1999;**116**(1 Suppl):2S-8S
32. Windsor AC, Mullen PG, Fowler AA, Sugerman HJ. Role of the neutrophil in adult respiratory distress syndrome. *The British journal of surgery* 1993;**80**(1):10-7

- 1  
2  
3 33. Shmueli H, Pitlik S, Drucker M, Samra Z, Konisberger H, Leibovici L. Prediction of mortality in  
4 patients with bacteremia: the importance of pre-existing renal insufficiency. *Renal failure*  
5 2000;**22**(1):99-108  
6  
7 34. Vincent JL, Nelson DR, Williams MD. Is worsening multiple organ failure the cause of death in  
8 patients with severe sepsis? *Critical care medicine* 2011;**39**(5):1050-5 doi:  
9 10.1097/CCM.0b013e31820eda29[published Online First: Epub Date]].  
10  
11 35. Koo DJ, Chaudry IH, Wang P. Kupffer cells are responsible for producing inflammatory cytokines  
12 and hepatocellular dysfunction during early sepsis. *The Journal of surgical research*  
13 1999;**83**(2):151-7 doi: 10.1006/jsre.1999.5584[published Online First: Epub Date]].  
14  
15 36. Dellinger RP, Levy MM, Rhodes A, et al. Surviving sepsis campaign: international guidelines for  
16 management of severe sepsis and septic shock: 2012. *Critical care medicine* 2013;**41**(2):580-  
17 637 doi: 10.1097/CCM.0b013e31827e83af[published Online First: Epub Date]].  
18  
19  
20  
21  
22  
23  
24  
25  
26  
27  
28  
29  
30  
31  
32  
33  
34  
35  
36  
37  
38  
39  
40  
41  
42  
43  
44  
45  
46  
47  
48  
49  
50  
51  
52  
53  
54  
55  
56  
57  
58  
59  
60

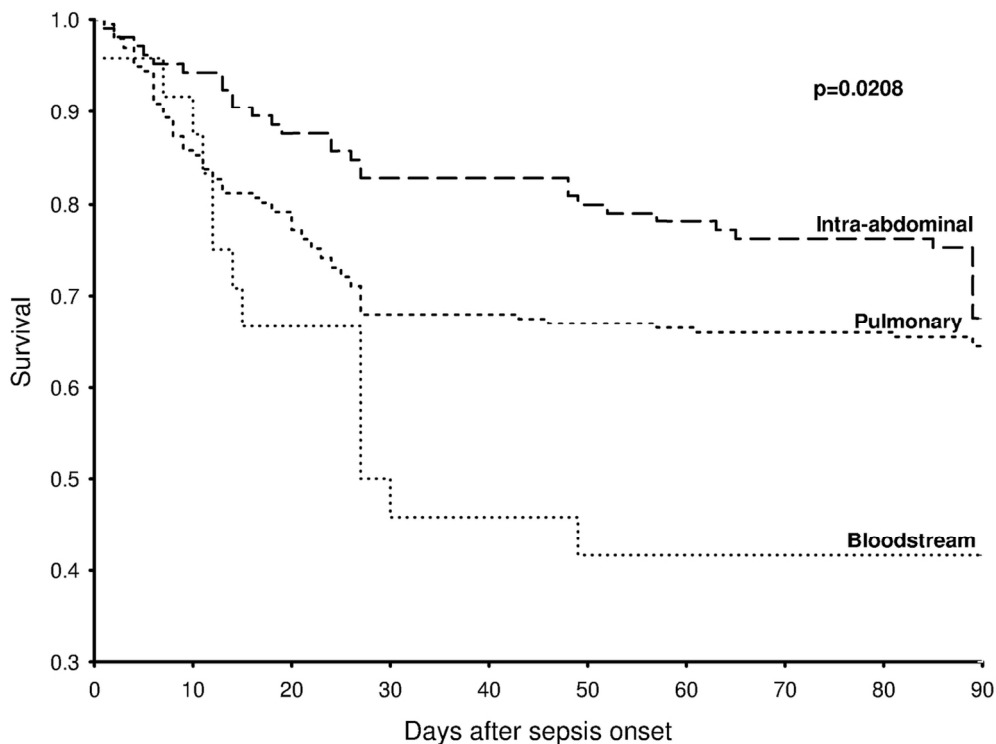

Figure 1. Kaplan-Meier survival analysis

The Kaplan-Meier curve shows the survival curves until day 90 for the three infection site groups. The mortality risk among the patients under study was higher among the patients with bloodstream infections compared with those in the pulmonary and intra-abdominal infection groups ( $p=0.0208$ , log-rank test).

124x93mm (300 x 300 DPI)

only

STROBE 2007 (v4) Statement—Checklist of items that should be included in reports of cohort studies

| Section/Topic             | Item # | Recommendation                                                                                                                                                                       | Reported on page # |
|---------------------------|--------|--------------------------------------------------------------------------------------------------------------------------------------------------------------------------------------|--------------------|
| Title and abstract        | 1      | (a) Indicate the study’s design with a commonly used term in the title or the abstract                                                                                               | 1                  |
|                           |        | (b) Provide in the abstract an informative and balanced summary of what was done and what was found                                                                                  | 2                  |
| <b>Introduction</b>       |        |                                                                                                                                                                                      |                    |
| Background/rationale      | 2      | Explain the scientific background and rationale for the investigation being reported                                                                                                 | 5                  |
| Objectives                | 3      | State specific objectives, including any prespecified hypotheses                                                                                                                     | 5                  |
| <b>Methods</b>            |        |                                                                                                                                                                                      |                    |
| Study design              | 4      | Present key elements of study design early in the paper                                                                                                                              | 6                  |
| Setting                   | 5      | Describe the setting, locations, and relevant dates, including periods of recruitment, exposure, follow-up, and data collection                                                      | 7-8                |
| Participants              | 6      | (a) Give the eligibility criteria, and the sources and methods of selection of participants. Describe methods of follow-up                                                           | 7-9                |
|                           |        | (b) For matched studies, give matching criteria and number of exposed and unexposed                                                                                                  | 7                  |
| Variables                 | 7      | Clearly define all outcomes, exposures, predictors, potential confounders, and effect modifiers. Give diagnostic criteria, if applicable                                             | 8                  |
| Data sources/ measurement | 8*     | For each variable of interest, give sources of data and details of methods of assessment (measurement). Describe comparability of assessment methods if there is more than one group | 8                  |
| Bias                      | 9      | Describe any efforts to address potential sources of bias                                                                                                                            | 8                  |
| Study size                | 10     | Explain how the study size was arrived at                                                                                                                                            | 8                  |
| Quantitative variables    | 11     | Explain how quantitative variables were handled in the analyses. If applicable, describe which groupings were chosen and why                                                         | 8-9                |
| Statistical methods       | 12     | (a) Describe all statistical methods, including those used to control for confounding                                                                                                | 9                  |
|                           |        | (b) Describe any methods used to examine subgroups and interactions                                                                                                                  | 9                  |
|                           |        | (c) Explain how missing data were addressed                                                                                                                                          | 9                  |
|                           |        | (d) If applicable, explain how loss to follow-up was addressed                                                                                                                       |                    |
|                           |        | (e) Describe any sensitivity analyses                                                                                                                                                | 9                  |
| <b>Results</b>            |        |                                                                                                                                                                                      |                    |



|                          |     |                                                                                                                                                                                                              |       |
|--------------------------|-----|--------------------------------------------------------------------------------------------------------------------------------------------------------------------------------------------------------------|-------|
| Participants             | 13* | (a) Report numbers of individuals at each stage of study—eg numbers potentially eligible, examined for eligibility, confirmed eligible, included in the study, completing follow-up, and analysed            | 10    |
|                          |     | (b) Give reasons for non-participation at each stage                                                                                                                                                         | 7     |
|                          |     | (c) Consider use of a flow diagram                                                                                                                                                                           | 7     |
| Descriptive data         | 14* | (a) Give characteristics of study participants (eg demographic, clinical, social) and information on exposures and potential confounders                                                                     | 10    |
|                          |     | (b) Indicate number of participants with missing data for each variable of interest                                                                                                                          |       |
|                          |     | (c) Summarise follow-up time (eg, average and total amount)                                                                                                                                                  | 12    |
| Outcome data             | 15* | Report numbers of outcome events or summary measures over time                                                                                                                                               | 12    |
| Main results             | 16  | (a) Give unadjusted estimates and, if applicable, confounder-adjusted estimates and their precision (eg, 95% confidence interval). Make clear which confounders were adjusted for and why they were included | 12-13 |
|                          |     | (b) Report category boundaries when continuous variables were categorized                                                                                                                                    | 12    |
|                          |     | (c) If relevant, consider translating estimates of relative risk into absolute risk for a meaningful time period                                                                                             | 13    |
| Other analyses           | 17  | Report other analyses done—eg analyses of subgroups and interactions, and sensitivity analyses                                                                                                               | 13    |
| <b>Discussion</b>        |     |                                                                                                                                                                                                              |       |
| Key results              | 18  | Summarise key results with reference to study objectives                                                                                                                                                     | 15-17 |
| <b>Limitations</b>       |     |                                                                                                                                                                                                              |       |
| Interpretation           | 20  | Give a cautious overall interpretation of results considering objectives, limitations, multiplicity of analyses, results from similar studies, and other relevant evidence                                   | 15-17 |
| Generalisability         | 21  | Discuss the generalisability (external validity) of the study results                                                                                                                                        | 17    |
| <b>Other information</b> |     |                                                                                                                                                                                                              |       |
| Funding                  | 22  | Give the source of funding and the role of the funders for the present study and, if applicable, for the original study on which the present article is based                                                |       |

\*Give information separately for cases and controls in case-control studies and, if applicable, for exposed and unexposed groups in cohort and cross-sectional studies.

**Note:** An Explanation and Elaboration article discusses each checklist item and gives methodological background and published examples of transparent reporting. The STROBE checklist is best used in conjunction with this article (freely available on the Web sites of PLoS Medicine at <http://www.plosmedicine.org/>, Annals of Internal Medicine at <http://www.annals.org/>, and Epidemiology at <http://www.epidem.com/>). Information on the STROBE Initiative is available at [www.strobe-statement.org](http://www.strobe-statement.org).

# BMJ Open

## Primary bacteremia is associated with a higher mortality risk compared with pulmonary and intra-abdominal infections in patients with sepsis: a prospective observational cohort study

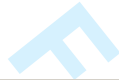

|                                 |                                                                                                                                                                                                                                                                                                                                                                                                                                                                                                                                                                                                                                                                                                                                                                                                                                                                          |
|---------------------------------|--------------------------------------------------------------------------------------------------------------------------------------------------------------------------------------------------------------------------------------------------------------------------------------------------------------------------------------------------------------------------------------------------------------------------------------------------------------------------------------------------------------------------------------------------------------------------------------------------------------------------------------------------------------------------------------------------------------------------------------------------------------------------------------------------------------------------------------------------------------------------|
| Journal:                        | <i>BMJ Open</i>                                                                                                                                                                                                                                                                                                                                                                                                                                                                                                                                                                                                                                                                                                                                                                                                                                                          |
| Manuscript ID:                  | bmjopen-2014-006616.R1                                                                                                                                                                                                                                                                                                                                                                                                                                                                                                                                                                                                                                                                                                                                                                                                                                                   |
| Article Type:                   | Research                                                                                                                                                                                                                                                                                                                                                                                                                                                                                                                                                                                                                                                                                                                                                                                                                                                                 |
| Date Submitted by the Author:   | 27-Oct-2014                                                                                                                                                                                                                                                                                                                                                                                                                                                                                                                                                                                                                                                                                                                                                                                                                                                              |
| Complete List of Authors:       | Mansur, Ashham; University Medical Center, Georg August University, Department of Anaesthesiology<br>Klee, Yvonne; University Medical Center, Georg August University, Department of Anaesthesiology<br>Popov, Aron; Royal Brompton and Harefield Hospital, Department of Cardiothoracic Transplantation & Mechanical Support<br>Erlenwein, Joachim; University Medical Center, Georg August University, Department of Anaesthesiology<br>Ghadimi, Michael; University Medical Center, Georg August University, Department of General and Visceral Surgery<br>Beissbarth, Tim; University Medical Center, Georg August University, Department of Medical Statistics<br>Bauer, Martin; University Medical Center, Georg August University, Department of Anaesthesiology<br>Hinz, José; University Medical Center, Georg August University, Department of Anaesthesiology |
| <b>Primary Subject Heading</b>: | Intensive care                                                                                                                                                                                                                                                                                                                                                                                                                                                                                                                                                                                                                                                                                                                                                                                                                                                           |
| Secondary Subject Heading:      | Anaesthesia                                                                                                                                                                                                                                                                                                                                                                                                                                                                                                                                                                                                                                                                                                                                                                                                                                                              |
| Keywords:                       | Adult intensive & critical care < INTENSIVE & CRITICAL CARE, Adult surgery < SURGERY, Adult anaesthesia < ANAESTHETICS                                                                                                                                                                                                                                                                                                                                                                                                                                                                                                                                                                                                                                                                                                                                                   |
|                                 |                                                                                                                                                                                                                                                                                                                                                                                                                                                                                                                                                                                                                                                                                                                                                                                                                                                                          |

SCHOLARONE™  
Manuscripts

1  
2  
3 **Primary bacteremia is associated with a higher mortality risk compared with**  
4 **pulmonary and intra-abdominal infections in patients with sepsis: a**  
5 **prospective observational cohort study**  
6  
7  
8  
9

10 Ashham Mansur<sup>1\*</sup>, Yvonne Klee<sup>1</sup>, Aron Frederik Popov<sup>2</sup>, Joachim Erlenwein<sup>1</sup>,  
11 Michael Ghadimi<sup>3</sup>, Tim Beissbarth<sup>4</sup>, Martin Bauer<sup>1</sup>, José Hinz<sup>1</sup>  
12  
13

14  
15  
16  
17 <sup>1</sup>Department of Anesthesiology, University Medical Center, Georg August  
18 University, D-37075 Goettingen, Germany  
19

20  
21 <sup>2</sup>Department of Cardiothoracic Transplantation & Mechanical Support, Royal  
22 Brompton and Harefield Hospital, Harefield, Hill End Road, UB9 6JH London,  
23 United Kingdom  
24

25 <sup>3</sup>Department of General and Visceral Surgery, University Medical Center, Georg  
26 August University, D-37075 Goettingen, Germany  
27

28 <sup>4</sup>Department of Medical Statistics, University Medical Center, Georg August  
29 University, D-37075 Goettingen, Germany  
30  
31  
32  
33  
34

35 **\*Corresponding author:**  
36

37 Dr. Ashham Mansur  
38

39 Medical consultant  
40

41 Dept. of Anesthesiology  
42

43 Georg-August-University, University Medical Center  
44

45 Robert-Koch-Str. 40, 37099 Goettingen, Germany  
46

47 Phone: +49 551 39 7819  
48

49 Fax: +49 551 39 13886  
50

51 E-mail: [ashham.mansur@med.uni-goettingen.de](mailto:ashham.mansur@med.uni-goettingen.de)  
52  
53  
54

55 **Keywords:** Apache II; Pulmonary infection; intra-abdominal infection; intensive  
56 care unit; organ failure marker; SOFA scores  
57

58 **Word count** 3058  
59  
60

## ABSTRACT

**Objective:** To investigate whether common infection foci (pulmonary, intra-abdominal and primary bacteremia) are associated with variations in mortality risk in sepsis patients.

**Design:** Prospective, observational cohort study.

**Setting:** Three surgical intensive care units (ICU) at a university medical center.

**Participants:** A total of 327 adult Caucasian patients with sepsis originating from pulmonary, intra-abdominal and primary bacteremia participated in this study.

**Primary and secondary outcome measures:** The patients were followed for 90 days, and mortality risk was recorded as the primary outcome variable. To monitor organ failure, sepsis-related organ failure assessment (SOFA) scores were evaluated at the onset of sepsis and throughout the observational period as secondary outcome variables.

**Results:** A total of 327 critically ill patients with sepsis were enrolled in this study. Kaplan-Meier survival analysis showed that the 90-day mortality risk was significantly higher among patients with primary bacteremia than among those with pulmonary and intra-abdominal foci (58%, 35% and 32%, respectively;  $p=0.0208$ ). To exclude the effects of several baseline variables, we performed multivariate Cox regression analysis. Primary bacteremia remained a significant covariate for mortality in the multivariate analysis (hazard ratio, 2.10; 95% CI, 1.14-3.86;  $p=0.0166$ ). During their stay in the ICU, the patients with primary bacteremia presented significantly higher SOFA scores than those of the patients with pulmonary and intra-abdominal infection foci ( $8.5\pm 4.7$ ,  $7.3\pm 3.4$  and  $5.8\pm 3.5$ , respectively). Patients with primary bacteremia presented higher SOFA-renal score compared with the patients with other infection foci ( $1.6\pm 1.4$ ,  $0.8\pm 1.1$  and  $0.7\pm 1.0$ , respectively); the primary bacteremia patients required significantly more renal replacement therapy than the patients in the other groups (29%, 11% and 12%, respectively).

1  
2  
3 **Conclusions:** These results indicate that sepsis patients with primary bacteremia present a  
4 higher mortality risk compared with patients with sepsis of pulmonary or intra-abdominal  
5 origins. These results should be assessed in sepsis patients in larger, independent cohorts.  
6  
7  
8  
9  
10  
11  
12  
13  
14  
15  
16  
17  
18  
19  
20  
21  
22  
23  
24  
25  
26  
27  
28  
29  
30  
31  
32  
33  
34  
35  
36  
37  
38  
39  
40  
41  
42  
43  
44  
45  
46  
47  
48  
49  
50  
51  
52  
53  
54  
55  
56  
57  
58  
59  
60

For peer review only

### Strengths and limitations of this study

- This is the first study to evaluate mortality risk among sepsis patients with primary bloodstream infections compared with those with respiratory or intra-abdominal infections over an observational period of 90 days.
- The strengths of our study include that it is the first to investigate organ-specific manifestations associated with common sepsis infection sites (respiratory, intra-abdominal and bloodstream) by quantifying SOFA scores and evaluating the requirements for organ support in the ICU.
- One potentially uncontrolled confounder that was not adjusted for is appropriate antibiotic therapy.

## INTRODUCTION

Sepsis is defined as a systemic inflammatory response that occurs during severe infection[1-3]. Sepsis affects more than 750,000 patients in the United States each year and remains one of the leading causes of death worldwide[4]. Although the incidence of this major health care problem has been increasing, the implementation of early goal-directed therapy in patients with severe sepsis and septic shock has in part successfully reduced mortality[5]. Guidelines for disease control have been written by the Surviving Sepsis Campaign (SSC), a joint collaboration between the Society of Critical Care Medicine and the European Society of Intensive Care Medicine committed to reducing mortality from severe sepsis and septic shock worldwide[6]. These guidelines contain clear recommendations for improving disease outcomes (e.g., guidelines for resuscitation and recommendations pertaining to infections, including for the use of diagnostics, hemodynamic support and adjunctive therapy and for supportive therapy for severe sepsis)[6].

Respiratory, intra-abdominal, urinary and primary bloodstream infections make up 80% of all infection sites[7]. According to epidemiological data, the lung is the most common site of infection, followed by the abdomen and the blood[2].

Pneumonia, hospital-acquired pneumonia (HAP), ventilator-associated pneumonia (VAP) and subsequent sepsis remain important causes of morbidity and mortality in critically ill patients despite advances in antimicrobial therapy, better supportive care modalities, and a wide range of preventive measures[8-10].

Intra-abdominal infections are a common cause of sepsis. These infections comprise a markedly heterogeneous group of infectious processes that share an anatomical site of origin between the diaphragm and the pelvis[11]. Their clinical course is dictated by a number of infection-related factors, including the microbiology of the infection, the anatomical location,

1  
2  
3 the degree of localization, and the presence of correctable anatomical derangements involving  
4  
5 intra-abdominal viscera[12 13].  
6  
7

8 Bloodstream infections (BSIs) are a major cause of death due to nosocomial events in  
9  
10 intensive care units (ICUs)[14]. Immunosuppression and invasive health care procedures act  
11  
12 together to create a high risk of nosocomial BSIs in critically ill patients[15]. The outcomes of  
13  
14 BSIs have been the focus of many case-control and cohort studies[15-17]. BSIs lead to poor  
15  
16 patient outcomes[16 18], prolonged patient stays in the ICU and in the hospital[16 19 20], and  
17  
18 substantial extra medical costs[21 22].  
19  
20

21  
22 Whether the characteristics of the infection, infection site and pathogenic organism  
23  
24 independently affect the outcome in patients with sepsis remains a subject of debate. Whereas  
25  
26 previous studies have shown an independent, significant contribution of the infection site and  
27  
28 the pathogenic organism to the survival of sepsis patients[23], recent investigations have not  
29  
30 found any significant impact of the infection site on mortality among patients with sepsis[24].  
31  
32

33  
34 This study aimed to explore whether common origins of sepsis infections, in particular  
35  
36 respiratory, intra-abdominal and bloodstream infection sites, are associated with changes in  
37  
38 the 90-day survival rate among patients with sepsis in a representative university medical  
39  
40 center, where patients are treated according to the most recent sepsis guidelines.  
41  
42  
43  
44  
45  
46  
47  
48  
49  
50  
51  
52  
53  
54  
55  
56  
57  
58  
59  
60



## MATERIALS AND METHODS

### Patients

Adult Caucasian patients admitted to ICUs at the University Medical Center-Goettingen (UMG) between April 2012 and May 2013 were screened daily according to the American College of Chest Physicians/Society of Critical Care Medicine (ACCP/SCCM) criteria for sepsis, severe sepsis, or septic shock[25 26]. This study was approved by the University of Goettingen ethics committee in Goettingen, Germany (1/15/12) and conformed to the ethical principles of the Declaration of Helsinki (Seoul, 2008). For each patient, written, informed consent was obtained from either the patient or his or her legal representative. Patients were enrolled if they presented sepsis of a respiratory, intra-abdominal or primary bloodstream origin. Caucasian origin was assessed by questioning the patients, their next of kin or their legal representatives.

### Definitions

In this study, patients with sepsis of respiratory origin had hospital-acquired pneumonia (HAP) or ventilator-associated pneumonia (VAP). HAP is the most frequent infection in surgical intensive care units and is defined as a pulmonary infection that was not incubating at the time of admission and that occurred at least 48 h after hospital admission[27]. Ventilator-associated pneumonia (VAP) is defined as either a pulmonary infection arising more than 48 h after tracheal intubation with no evidence of pneumonia at the time of intubation or the diagnosis of a new pulmonary infection if the initial ICU admission was due to pneumonia[27].

Typically, patients with intra-abdominal infections in the surgical ICU develop secondary peritonitis as a result of microbial infection of the peritoneal space following perforation, abscess formation, ischemic necrosis, or a penetrating injury of the intra-abdominal contents[11].

1  
2  
3 Primary BSI comprises BSI of unknown origin in patients without an identifiable focus of  
4 infection and intravascular BSI (related to the presence of a catheter, implantable  
5 cardioverter-defibrillator or pacemaker)[11].  
6  
7

### 8 9 **Exclusion criteria**

10 As described previously[28 29], the patient exclusion criteria were the following: (1) age less  
11 than 18 years; (2) being pregnant or nursing an infant; (3) immunosuppressive therapy (e.g.,  
12 cyclosporine or azathioprine) or cancer-related chemotherapy; (4) documented or suspected  
13 acute myocardial infarction within the previous 6 weeks; (5) a history of New York Heart  
14 Association functional class IV chronic heart failure; (6) human immunodeficiency virus  
15 infection; (7) a do not resuscitate or do not treat order or the patient and/or his or her legal  
16 representative not being committed to aggressive management; (8) not being expected to  
17 survive the 28-day observation period or not being likely to be placed on life support because  
18 of an uncorrectable medical condition, including a poorly controlled neoplasm or end-stage  
19 lung disease; (9) a chronic vegetative state or a similar long-term neurological condition; (10)  
20 current participation in any interventional study (of a drug or device); (11) inability to be fully  
21 evaluated during the study period; and (12) being a study-site employee or a family member  
22 of a study-site employee involved in conducting this study.  
23  
24  
25  
26  
27  
28  
29  
30  
31  
32  
33  
34  
35  
36  
37  
38  
39  
40  
41  
42  
43  
44  
45  
46  
47  
48  
49  
50  
51  
52  
53  
54  
55  
56  
57  
58  
59  
60

### Data collection

Patients were followed up for 90 days, and mortality risk was recorded as the primary outcome variable. Sequential Organ Failure Assessment (SOFA)[30] and Acute Physiology and Chronic Health Evaluation (APACHE) II[31] scores were evaluated at the onset of sepsis. Organ function was reassessed over 28 days in the ICU to monitor morbidity as previously described[28]. Organ failure, organ support requirements and the length of ICU stay were recorded as secondary outcome variables. All relevant clinical data were extracted from the electronic patient record system (IntelliSpace Critical Care and Anesthesia (ICCA); Philips Healthcare, USA); all medical records, including microbiology reports, can be found in this system. We sought to determine whether patients suffered from preexisting conditions, for example, comorbidities, by examining physicians' notes, administering an anamnestic questionnaire to the patients or their legal representatives and consulting each patient's family doctor.

### Statistical analyses

Statistical analyses were performed using Statistica software (version 10; StatSoft, Tulsa, Oklahoma, USA). Based on contingency tables, significance was calculated using two-sided Fisher's exact or chi-square tests, as appropriate. Two continuous variables were compared using the Mann-Whitney test. Time-to-event data were compared using the log-rank test from the Statistica package for Kaplan-Meier survival analysis. For variables identified as significant in univariate survival analyses (respiratory infections, intra-abdominal infections and primary bacteremia), potential confounders (age, gender and BMI) and covariates that varied at baseline (diabetes mellitus (IDDM), history of cancer and "No history of surgery"), we performed multivariate Cox regression analysis to examine survival times. A value of  $p < 0.05$  was considered statistically significant.

## RESULTS

### Study population

A total of 327 adult Caucasian patients with sepsis were enrolled in this study. At enrollment, 61% of the patients had a pulmonary infection; 32% suffered from an intra-abdominal infection; and 7% presented with a primary bloodstream infection (Table 1). Patients' ages ranged from 19 to 91 years (median, 65 years). At baseline, patients' SOFA and APACHE II scores, which measure disease severity, were  $9.3 \pm 4.0$  and  $21.5 \pm 7.3$ , respectively (Table 1). Comorbidities included hypertension, myocardial infarction history, chronic obstructive pulmonary disease (COPD), renal dysfunction, non-insulin-dependent diabetes mellitus, insulin-dependent diabetes mellitus, chronic liver diseases, history of cancer, and a history of stroke (Table 1).

**Table 1. Patient baseline characteristics with regard to the infection site**

|                                  | All<br>n=327   | Pulmonary<br>n=198 | Intra-abdominal<br>n=105 | Bloodstream<br>n=24 | p-value |
|----------------------------------|----------------|--------------------|--------------------------|---------------------|---------|
| Age, mean $\pm$ SD               | 62 $\pm$ 15    | 61 $\pm$ 15        | 65 $\pm$ 13              | 60 $\pm$ 16         | 0.2426  |
| Male, %                          | 67%            | 70                 | 61                       | 62                  | 0.2614  |
| Body mass index, mean $\pm$ SD   | 27 $\pm$ 6     | 27 $\pm$ 7         | 27 $\pm$ 5               | 29 $\pm$ 5          | 0.0885  |
| SOFA score, mean $\pm$ SD        | 9.3 $\pm$ 4.0  | 9.4 $\pm$ 3.6      | 8.9 $\pm$ 4.7            | 10.5 $\pm$ 5.1      | 0.3099  |
| APACHE II score, mean $\pm$ SD   | 21.5 $\pm$ 7.3 | 21.8 $\pm$ 6.8     | 20.6 $\pm$ 8.1           | 22.8 $\pm$ 7.6      | 0.3538  |
| Organ support, %                 |                |                    |                          |                     |         |
| Mechanical ventilation           | 85             | 90                 | 74                       | 87                  | 0.0008  |
| Use of vasopressor               | 64             | 62                 | 65                       | 70                  | 0.6778  |
| Renal replacement therapy        | 8              | 7                  | 9                        | 20                  | 0.0781  |
| Comorbidities, %                 |                |                    |                          |                     |         |
| Hypertension                     | 57             | 55                 | 59                       | 66                  | 0.5395  |
| History of myocardial infarction | 8              | 9                  | 7                        | 8                   | 0.9087  |
| COPD                             | 17             | 17                 | 17                       | 16                  | 0.9880  |
| Renal dysfunction                | 11             | 10                 | 9                        | 25                  | 0.0857  |
| Diabetes mellitus (NIDDM)        | 9              | 10                 | 8                        | 8                   | 0.8928  |
| Diabetes mellitus (IDDM)         | 11             | 8                  | 11                       | 33                  | 0.0015  |
| Chronic liver diseases           | 5              | 3                  | 8                        | 8                   | 0.1538  |
| History of cancer                | 18             | 15                 | 30                       | 0                   | 0.0003  |
| History of stroke                | 6              | 8                  | 4                        | 0                   | 0.2192  |
| Recent surgical history, %       |                |                    |                          |                     |         |
| Elective surgery                 | 30             | 27                 | 37                       | 25                  | 0.1730  |
| Emergency surgery                | 48             | 45                 | 56                       | 42                  | 0.1401  |

|                       |    |    |   |    |         |
|-----------------------|----|----|---|----|---------|
| No history of surgery | 21 | 28 | 7 | 33 | <0.0001 |
|-----------------------|----|----|---|----|---------|

The data are presented as the means±SDs or percentages.

For peer review only

### Disease severity at the onset of sepsis

No differences in age, gender, or body mass index were found among the three groups of study subjects. Moreover, no differences were found in the SOFA and APACHE II scores with respect to the infection sites at the onset of sepsis. The patients in the group with intra-abdominal infections required significantly less mechanical ventilation compared with the other groups with pulmonary and bloodstream infections (74%, 90% and 87%, respectively). The patients with bloodstream infections suffered significantly more from insulin-dependent diabetes mellitus compared with patients with pulmonary or intra-abdominal infections (33%, 8%, 11%, respectively). In contrast, none of the patients with bloodstream infections had a history of cancer, unlike the patients with pulmonary and intra-abdominal infections (15% and 30%, respectively; Table 1).

## Mortality analysis

Kaplan-Meier survival analysis showed that the 90-day mortality risk was significantly higher among patients with primary bacteremia than among those with pulmonary and intra-abdominal foci (58%, 35% and 32%, respectively; Figure 1). Analysis of the 28-day mortality data similarly revealed that the patients with bloodstream infections had a significantly increased risk of death compared with the patients with pulmonary and intra-abdominal infections (50%, 32% and 17%, respectively; Table 2). Moreover, 90-day mortality analysis suggested a higher incidence of death among the patients with bloodstream infections, although this finding was not significant ( $p=0.0544$ ; Table 2).

**Table 2. Disease severity with regard to infection site**

|                              | All<br>n=327 | Pulmonary<br>n=198 | Intra-abdominal<br>n=105 | Bloodstream<br>n=24 | p-value |
|------------------------------|--------------|--------------------|--------------------------|---------------------|---------|
| SOFA                         | 6.9±3.6      | 7.3±3.4            | 5.8±3.5                  | 8.5±4.7             | 0.0002  |
| SOFA Subscores               |              |                    |                          |                     |         |
| SOFA-Respiratory             | 1.9±0.7      | 2.2±0.6            | 1.5±0.7                  | 1.9±0.9             | <0.0001 |
| SOFA-Cardiovascular          | 1.5±0.9      | 1.5±0.9            | 1.3±0.9                  | 1.7±1.2             | 0.4567  |
| SOFA-Central nervous system  | 1.8±1.1      | 2.1±1.0            | 1.4±1.0                  | 2.0±1.2             | <0.0001 |
| SOFA-Renal                   | 0.8±1.1      | 0.8±1.1            | 0.7±1.0                  | 1.6±1.4             | 0.0028  |
| SOFA-Coagulation             | 0.3±0.5      | 0.3±0.6            | 0.2±0.5                  | 0.6±0.8             | 0.4662  |
| SOFA-Hepatic                 | 0.4±0.7      | 0.3±0.6            | 0.5±0.8                  | 0.5±0.6             | 0.0030  |
| Organ support*, %            |              |                    |                          |                     |         |
| Mechanical ventilation       |              | 85                 | 62                       | 76                  | <0.0001 |
| Use of vasopressor           |              | 54                 | 45                       | 49                  | 0.8355  |
| Renal replacement therapy    |              | 11                 | 12                       | 29                  | 0.0069  |
| Length of stay in ICU (days) | 18±15        | 17±14              | 20±16                    | 16±13               | 0.5061  |
| Mortality analysis, %:       |              |                    |                          |                     |         |
| Death by day 28              | 94 (28)      | 64 (32)            | 18 (17)                  | 12 (50)             | 0.0012  |
| Death by day 90              | 118 (36)     | 70 (35)            | 34 (32)                  | 14 (58)             | 0.0544  |

The data are presented as means±SDs or percentages.

\*Based on the total number of observations during the follow-up period.

## Multivariate analysis



To exclude the effects of several baseline variables on survival among the three groups being investigated, we performed multivariate Cox regression analysis. Bloodstream infection remained a significant covariate for mortality in the multivariate analysis (hazard ratio, 2.10; 95% CI, 1.14-3.86;  $p=0.0166$ ; Table 3). This finding indicates that, despite baseline differences in some variables (i.e., IDDM, Cancer and “No history of surgery”), the presence of a primary bloodstream infection remains a prognostic variable with a significant effect on the outcome (90-day survival; Table 3).

**Table 3. Cox regression analysis**

| Infection site   | Variable                  | Hazard ratio | 95% CI    | p-value |
|------------------|---------------------------|--------------|-----------|---------|
| Pulmonary:       |                           |              |           |         |
|                  | Age                       | 1.02         | 1.00-1.03 | 0.0009  |
|                  | Gender                    | 1.19         | 0.80-1.76 | 0.3803  |
|                  | BMI                       | 1.00         | 0.97-1.03 | 0.7058  |
|                  | Diabetes mellitus (IDDM)  | 1.29         | 0.75-2.19 | 0.3450  |
|                  | History of cancer         | 1.26         | 0.81-1.95 | 0.2921  |
|                  | No history of surgery     | 1.37         | 0.87-2.14 | 0.1634  |
|                  | Pulmonary infection       | 1.05         | 0.72-1.55 | 0.7675  |
| Intra-abdominal: |                           |              |           |         |
|                  | Age                       | 1.02         | 1.00-1.03 | 0.0007  |
|                  | Gender                    | 1.17         | 0.79-1.73 | 0.4302  |
|                  | BMI                       | 1.00         | 0.97-1.03 | 0.6497  |
|                  | Diabetes mellitus (IDDM)  | 1.28         | 0.75-2.16 | 0.3534  |
|                  | History of cancer         | 1.33         | 0.85-2.06 | 0.2036  |
|                  | No history of surgery     | 1.25         | 0.80-1.97 | 0.3209  |
|                  | Intra-abdominal infection | 0.71         | 0.46-1.08 | 0.1142  |
| Bloodstream:     |                           |              |           |         |
|                  | Age                       | 1.02         | 1.01-1.03 | 0.0007  |
|                  | Gender                    | 1.18         | 0.80-1.75 | 0.3956  |
|                  | BMI                       | 1.00         | 0.97-1.03 | 0.7930  |
|                  | Diabetes mellitus (IDDM)  | 1.07         | 0.61-1.88 | 0.7877  |
|                  | History of cancer         | 1.36         | 0.87-2.12 | 0.1719  |
|                  | No history of surgery     | 1.30         | 0.84-2.02 | 0.2290  |
|                  | Bloodstream infection     | 2.10         | 1.14-3.86 | 0.0166  |

### Disease severity

During the observational period, patients with bloodstream infections presented significantly higher mean SOFA scores compared with patients in the other groups ( $8.5\pm 4.7$ ,  $7.3\pm 3.4$  and  $5.8\pm 3.5$ , respectively; Table 2). Four of the six organ-specific SOFA scores (respiratory,

central nervous system (CNS), renal and hepatic) varied significantly among the study groups. The patients with pulmonary infections presented higher SOFA-respiratory scores than did patients with intra-abdominal and bloodstream infections ( $2.2\pm 0.6$ ,  $1.5\pm 0.7$  and  $1.9\pm 0.9$ , respectively; Table 2), and together with the patients with bloodstream infections, required more mechanical ventilation than patients with intra-abdominal infections (85%, 76% and 62%, respectively; Table 2). The patients with pulmonary and bloodstream infections presented higher SOFA-CNS scores than those of the patients with intra-abdominal infections ( $2.1\pm 1.0$ ,  $2.0\pm 1.2$  and  $1.4\pm 1.0$ , respectively; Table 2). Analysis of the SOFA-renal scores indicated that the patients with bloodstream infections presented higher SOFA-renal scores over the study period in the ICU compared with the patients with pulmonary and intra-abdominal infections ( $1.6\pm 1.4$ ,  $0.8\pm 1.1$  and  $0.7\pm 1.0$ , respectively; Table 2). These patients also required significantly more renal replacement therapy (29%, 11% and 12%, respectively; Table 2). The SOFA-hepatic score was significantly higher in the patients with intra-abdominal and bloodstream infections compared with the patients with pulmonary infections ( $0.5\pm 0.8$ ,  $0.5\pm 0.6$  and  $0.3\pm 0.6$ , respectively; Table 2). Additional results regarding disease severity were added to the supplemental data (see online supplementary data, Table 1).

In addition, the gram-negative infection rate was significantly higher among the patients with pulmonary infections (75%) compared with those whose sepsis had intra-abdominal and bloodstream infection origins (57% and 54%, respectively; Table 4). Additional results regarding microbiological findings and anti-infective therapy were added to the supplemental data (see online supplementary data, Table 2 and Table 3; respectively).

**Table 4. Infection types over the observational period**

| Infection site         | Pulmonary | Intra-abdominal | Bloodstream | p-value |
|------------------------|-----------|-----------------|-------------|---------|
| <b>Infection type</b>  |           |                 |             |         |
| Gram-negative bacteria | 75%       | 57%             | 54%         | 0.0026  |
| Gram-positive bacteria | 78%       | 84%             | 79%         | 0.5142  |
| Fungus                 | 52%       | 76%             | 42%         | <0.0001 |
| Virus                  | 0.08%     | 0.06%           | 0.13%       | 0.4941  |

1  
2  
3 Furthermore, septic patients with intra-abdominal infections presented a higher incidence of  
4  
5 fungal infections (76%) compared with the patients with pulmonary and bloodstream  
6  
7 infections (52% and 42%, respectively; Table 4).  
8  
9  
10  
11  
12  
13  
14  
15  
16  
17  
18  
19  
20  
21  
22  
23  
24  
25  
26  
27  
28  
29  
30  
31  
32  
33  
34  
35  
36  
37  
38  
39  
40  
41  
42  
43  
44  
45  
46  
47  
48  
49  
50  
51  
52  
53  
54  
55  
56  
57  
58  
59  
60

For peer review only

## DISCUSSION

The present study addressed whether common infection sites among patients with sepsis are associated with the survival rate.

The primary endpoint, the mortality risk within 90 days of the onset of sepsis, was higher in patients with primary bloodstream infections compared with those with respiratory or intra-abdominal infections (58%, 35% and 32%, respectively; Fig. 1). Primary bacteremia remained a significant covariate for mortality in the multivariate analysis (Table 3).

According to the SOFA and APACHE II scores, the infection site was not associated with the acute-illness severity at the onset of sepsis (Table 1). We believe that the similarity in SOFA and APACHE II scores at sepsis onset among the three groups can be attributed to the phenotypic heterogeneity of sepsis. This heterogeneity is affected by several factors, including the causative organism of the infection and the amount of time elapsed since the infection began, as well as by individual patient characteristics, such as comorbidities and genetic makeup[28].

The most significant result of this study with respect to 90-day mortality risk was that the mortality rate (58%) was higher among patients with primary bloodstream infections; this result is in agreement with the results of several previous investigations that found similar mortality rates in patients with nosocomial bloodstream infections; e.g., Garrouste-Orgeas et al. found that patients with nosocomial BSI had a mortality rate of 61.5%[14 15]. Our study also goes beyond previous investigations by evaluating a longer-term end point (90 days); this end point was investigated because sepsis patients continue to face an increased risk of mortality, even after ICU and hospital discharge[32].

Severe morbidity, quantified by the SOFA mean score in patients with primary bloodstream infections, resulted in an increased 28-day mortality rate compared with the patients with pulmonary and intra-abdominal infections (50%, 32% and 17%, respectively; Table 2).

1  
2  
3 The strengths of our study include that it is the first to investigate organ-specific  
4 manifestations associated with common sepsis infection sites (respiratory, intra-abdominal  
5 and bloodstream) by quantifying SOFA scores and evaluating the requirements for organ  
6 support in the ICU (Table 2). The more pronounced types of respiratory failure, which are  
7 quantified by the SOFA-respiratory score and the need for mechanical ventilation (Table 2),  
8 among patients with pulmonary infections are plausible because these patients frequently  
9 present compromised pulmonary function. Patients with primary bacteremia are also at a high  
10 risk of respiratory failure due to systemic inflammatory response syndrome, release of pro-  
11 inflammatory cytokines (such as tumor necrosis factor (TNF), IL-1 and IL-6,[33]) and  
12 recruitment of neutrophils to the lungs, which induces the release of toxic mediators, such as  
13 reactive oxygen species and proteases, thus contributing to lung damage and respiratory  
14 failure[34].

15  
16 We believe that the difference in the SOFA-CNS score between the genotypes (with higher  
17 scores in the respiratory and the bloodstream groups) occurred because patients in these  
18 groups required much more mechanical ventilation, causing them to be treated more  
19 frequently with sedating medication, which impacts the CNS and thus affects the SOFA-CNS  
20 score.

21  
22 The observed distinct renal failure among bloodstream infection patients indicated by the  
23 SOFA-renal score, which was accompanied by frequent renal replacement therapy (Table 2),  
24 was in accordance with former observations indicating that bloodstream infections are  
25 associated with a higher incidence of renal failure[35]. The frequent utilization of renal  
26 replacement therapy suggests persistent organ dysfunction, which is a well-known contributor  
27 to sepsis-related mortality and may explain the higher mortality among bloodstream infection  
28 patients observed in our study (Table 2, Figure 1)[36].

29  
30 The SOFA-hepatic score was higher among patients with intra-abdominal and primary  
31 bloodstream infections compared with patients with pulmonary infections (Table 2). This

1  
2  
3 result can be attributed to the fact that Kupffer cells release several cytokines able to induce  
4 hepatocellular dysfunction in response to endotoxemia in patients with bloodstream  
5 infections[37].  
6  
7

8  
9 There are some limitations to this study, along with potential confounding. One limitation to  
10 this study is the possibility of selection bias; for example, the patients in this study may have  
11 had a higher mortality rate in general than septic patients in other ICUs (e.g., in secondary  
12 medical care centers) because patients admitted to our surgical ICUs frequently had more  
13 severe coexisting diseases than did patients in other ICUs (non-tertiary care center ICUs). A  
14 second potential limitation to this study is measurement bias. For example, many clinical  
15 parameters (e.g., blood pressure, heart rate, and respiratory frequency) were registered  
16 automatically in the electronic patient record system, and we cannot guarantee that all  
17 registered clinical parameters were always correct because of potential measurement errors.  
18 However, we did check all clinical records for plausibility before conducting our statistical  
19 analysis. Finally, one uncontrolled confounder that was not adjusted for is appropriate  
20 antibiotic therapy; although patients with clinical signs of infection were routinely promptly  
21 given antibiotic therapy, data regarding the exact times at which patients received antibiotic  
22 doses after sepsis onset are unavailable.  
23  
24  
25  
26  
27  
28  
29  
30  
31  
32  
33  
34  
35  
36  
37  
38  
39

40 To the best of our knowledge, this investigation is the first to evaluate 90-day survival rates  
41 with respect to common sepsis infection sites (respiratory, intra-abdominal and primary  
42 bloodstream). This study revealed a significantly higher mortality rate among patients with  
43 primary bloodstream infections (58%) compared with patients with respiratory and intra-  
44 abdominal infections, although all patients were treated according to current guidelines for the  
45 treatment of sepsis (Surviving Sepsis Campaign)[6]. Because of this dramatically higher  
46 mortality rate among patients with primary bloodstream sepsis, we believe that future sepsis  
47 trials should focus on this vulnerable group of high-risk patients. More appropriate  
48 interventions and further improvements in prevention and care are urgently needed.  
49  
50  
51  
52  
53  
54  
55  
56  
57  
58  
59  
60

1  
2  
3 **Acknowledgments** The authors thank the staff of the ICUs of the Department of  
4 Anesthesiology and the Department of General and Visceral Surgery, all of whom were  
5 involved in patient care. The authors also thank Benjamin Liese, Simon Wilmers, Chang Ho  
6 Hong, Sebastian Gerber and Maximillian Steinau for their dedicated help with the data  
7 collection for this study. This study was supported by the German Research Foundation  
8 (DFG) and the Open Access Publication Funds of Göttingen University.  
9  
10  
11  
12  
13  
14  
15  
16  
17

18 **Contributors** All authors contributed to the study design, data acquisition (clinical and  
19 experimental), or the analysis and interpretation of data. Specifically, YK collected clinical  
20 data and participated in the statistical analysis and interpretation of the data. AP, JE, MG and  
21 MB contributed to the study design, supervised patient enrollment and clinical data  
22 monitoring and interpreted data. TB contributed to the study design and conception and  
23 performed and approved the statistical analyses. AM and JH designed the study, supervised  
24 the sample and data collection, interpreted the data and drafted the manuscript. All authors  
25 were involved either in writing or revising the manuscript. All authors have approved the final  
26 version of the manuscript.  
27  
28  
29  
30  
31  
32  
33  
34  
35  
36  
37  
38  
39

40 **Funding:** None.

41 **Competing interests:** None.  
42  
43  
44  
45  
46

47 **Ethics approval:** This study was approved by the University of Goettingen ethics committee  
48 in Goettingen, Germany (1/15/12).  
49  
50  
51  
52  
53  
54  
55  
56  
57  
58  
59  
60

## REFERENCES

1. Vincent JL, Rello J, Marshall J, et al. International study of the prevalence and outcomes of infection in intensive care units. *JAMA :A: the journal of the American Medical Association* 2009;**302**(21):2323-9 doi: 10.1001/jama.2009.1754[published Online First: Epub Date]].
2. Vincent JL, Sakr Y, Sprung CL, et al. Sepsis in European intensive care units: results of the SOAP study. *Critical care medicine* 2006;**34**(2):344-53
3. O'Brien JM, Jr., Ali NA, Aberegg SK, Abraham E. Sepsis. *The American journal of medicine* 2007;**120**(12):1012-22 doi: 10.1016/j.amjmed.2007.01.035[published Online First: Epub Date]].
4. Angus DC, Linde-Zwirble WT, Lidicker J, Clermont G, Carcillo J, Pinsky MR. Epidemiology of severe sepsis in the United States: analysis of incidence, outcome, and associated costs of care. *Critical care medicine* 2001;**29**(7):1303-10
5. Rivers E, Nguyen B, Havstad S, et al. Early goal-directed therapy in the treatment of severe sepsis and septic shock. *The New England journal of medicine* 2001;**345**(19):1368-77 doi: 10.1056/NEJMoa010307[published Online First: Epub Date]].
6. Dellinger RP, Levy MM, Rhodes A, et al. Surviving sepsis campaign: international guidelines for management of severe sepsis and septic shock: 2012. *Critical care medicine* 2013;**41**(2):580-637 doi: 10.1097/CCM.0b013e31827e83af[published Online First: Epub Date]].
7. Alberti C, Brun-Buisson C, Burchardi H, et al. Epidemiology of sepsis and infection in ICU patients from an international multicentre cohort study. *Intensive care medicine* 2002;**28**(2):108-21 doi: 10.1007/s00134-001-1143-z[published Online First: Epub Date]].
8. Hospital-acquired pneumonia in adults: diagnosis, assessment of severity, initial antimicrobial therapy, and preventive strategies. A consensus statement, American Thoracic Society, November 1995. *American journal of respiratory and critical care medicine* 1996;**153**(5):1711-25 doi: 10.1164/ajrccm.153.5.8630626[published Online First: Epub Date]].
9. Craven DE, Kunches LM, Kilinsky V, Lichtenberg DA, Make BJ, McCabe WR. Risk factors for pneumonia and fatality in patients receiving continuous mechanical ventilation. *The American review of respiratory disease* 1986;**133**(5):792-6
10. Niederman MS. Guidelines for the management of respiratory infection: why do we need them, how should they be developed, and can they be useful? *Current opinion in pulmonary medicine* 1996;**2**(3):161-5
11. Calandra T, Cohen J, International Sepsis Forum Definition of Infection in the ICUCC. The international sepsis forum consensus conference on definitions of infection in the intensive care unit. *Critical care medicine* 2005;**33**(7):1538-48
12. Evans HL, Raymond DP, Pelletier SJ, Crabtree TD, Pruett TL, Sawyer RG. Diagnosis of intra-abdominal infection in the critically ill patient. *Current opinion in critical care* 2001;**7**(2):117-21
13. Marshall JC, Innes M. Intensive care unit management of intra-abdominal infection. *Critical care medicine* 2003;**31**(8):2228-37 doi: 10.1097/01.ccm.0000087326.59341.51[published Online First: Epub Date]].
14. Timsit JF, Laupland KB. Update on bloodstream infections in ICUs. *Current opinion in critical care* 2012;**18**(5):479-86 doi: 10.1097/MCC.0b013e328356cefe[published Online First: Epub Date]].
15. Garrouste-Orgeas M, Timsit JF, Tafflet M, et al. Excess risk of death from intensive care unit-acquired nosocomial bloodstream infections: a reappraisal. *Clinical infectious diseases :s: an official publication of the Infectious Diseases Society of America* 2006;**42**(8):1118-26 doi: 10.1086/500318[published Online First: Epub Date]].
16. Pittet D, Tarara D, Wenzel RP. Nosocomial bloodstream infection in critically ill patients. Excess length of stay, extra costs, and attributable mortality. *JAMA :A: the journal of the American Medical Association* 1994;**271**(20):1598-601



17. Renaud B, Brun-Buisson C, Group IC-BS. Outcomes of primary and catheter-related bacteremia. A cohort and case-control study in critically ill patients. *American journal of respiratory and critical care medicine* 2001;**163**(7):1584-90 doi: 10.1164/ajrccm.163.7.9912080[published Online First: Epub Date]].
18. Klevens RM, Edwards JR, Richards CL, Jr., et al. Estimating health care-associated infections and deaths in U.S. hospitals, 2002. *Public health reports (Washington, D.C. :. : 1974)* 2007;**122**(2):160-6
19. Digiovine B, Chenoweth C, Watts C, Higgins M. The attributable mortality and costs of primary nosocomial bloodstream infections in the intensive care unit. *American journal of respiratory and critical care medicine* 1999;**160**(3):976-81 doi: 10.1164/ajrccm.160.3.9808145[published Online First: Epub Date]].
20. Rello J, Ochagavia A, Sabanes E, et al. Evaluation of outcome of intravenous catheter-related infections in critically ill patients. *American journal of respiratory and critical care medicine* 2000;**162**(3 Pt 1):1027-30 doi: 10.1164/ajrccm.162.3.9911093[published Online First: Epub Date]].
21. Perencevich EN, Stone PW, Wright SB, et al. Raising standards while watching the bottom line: making a business case for infection control. *Infection control and hospital epidemiology :y: the official journal of the Society of Hospital Epidemiologists of America* 2007;**28**(10):1121-33 doi: 10.1086/521852[published Online First: Epub Date]].
22. Lin MY, Hota B, Khan YM, et al. Quality of traditional surveillance for public reporting of nosocomial bloodstream infection rates. *JAMA :A: the journal of the American Medical Association* 2010;**304**(18):2035-41 doi: 10.1001/jama.2010.1637[published Online First: Epub Date]].
23. Cohen J, Cristofaro P, Carlet J, Opal S. New method of classifying infections in critically ill patients. *Critical care medicine* 2004;**32**(7):1510-26
24. Zahar JR, Timsit JF, Garrouste-Orgeas M, et al. Outcomes in severe sepsis and patients with septic shock: pathogen species and infection sites are not associated with mortality. *Critical care medicine* 2011;**39**(8):1886-95 doi: 10.1097/CCM.0b013e31821b827c[published Online First: Epub Date]].
25. Bone RC, Balk RA, Cerra FB, et al. Definitions for sepsis and organ failure and guidelines for the use of innovative therapies in sepsis. The ACCP/SCCM Consensus Conference Committee. American College of Chest Physicians/Society of Critical Care Medicine. 1992. *Chest* 2009;**136**(5 Suppl):e28
26. Levy MM, Fink MP, Marshall JC, et al. 2001 SCCM/ESICM/ACCP/ATS/SIS International Sepsis Definitions Conference. *Critical care medicine* 2003;**31**(4):1250-6 doi: 10.1097/01.ccm.0000050454.01978.3b[published Online First: Epub Date]].
27. American Thoracic S, Infectious Diseases Society of A. Guidelines for the management of adults with hospital-acquired, ventilator-associated, and healthcare-associated pneumonia. *American journal of respiratory and critical care medicine* 2005;**171**(4):388-416 doi: 10.1164/rccm.200405-644ST[published Online First: Epub Date]].
28. Mansur A, von Gruben L, Popov AF, et al. The regulatory toll-like receptor 4 genetic polymorphism rs11536889 is associated with renal, coagulation and hepatic organ failure in sepsis patients. *Journal of translational medicine* 2014;**12**:177 doi: 10.1186/1479-5876-12-177[published Online First: Epub Date]].
29. Mansur A, Hinz J, Hillebrecht B, et al. Ninety-day survival rate of patients with sepsis relates to programmed cell death 1 genetic polymorphism rs11568821. *Journal of investigative medicine :e: the official publication of the American Federation for Clinical Research* 2014;**62**(3):638-43 doi: 10.231/jim.0000000000000059[published Online First: Epub Date]].
30. Vincent JL, de Mendonca A, Cantraine F, et al. Use of the SOFA score to assess the incidence of organ dysfunction/failure in intensive care units: results of a multicenter, prospective study. Working group on "sepsis-related problems" of the European Society of Intensive Care Medicine. *Critical care medicine* 1998;**26**(11):1793-800

- 1
- 2
- 3 31. Knaus WA, Draper EA, Wagner DP, Zimmerman JE. APACHE II: a severity of disease classification
- 4 system. *Critical care medicine* 1985;**13**(10):818-29
- 5 32. Khamis R. Execution of sepsis trials needs an overhaul, experts say. *Nature medicine*
- 6 2012;**18**(7):998-9 doi: 10.1038/nm0712-998b[published Online First: Epub Date] |.
- 7 33. Martin TR. Lung cytokines and ARDS: Roger S. Mitchell Lecture. *Chest* 1999;**116**(1 Suppl):2S-8S
- 8 34. Windsor AC, Mullen PG, Fowler AA, Sugerman HJ. Role of the neutrophil in adult respiratory
- 9 distress syndrome. *The British journal of surgery* 1993;**80**(1):10-7
- 10 35. Shmueli H, Pitlik S, Drucker M, Samra Z, Konisberger H, Leibovici L. Prediction of mortality in
- 11 patients with bacteremia: the importance of pre-existing renal insufficiency. *Renal failure*
- 12 2000;**22**(1):99-108
- 13 36. Vincent JL, Nelson DR, Williams MD. Is worsening multiple organ failure the cause of death in
- 14 patients with severe sepsis? *Critical care medicine* 2011;**39**(5):1050-5 doi:
- 15 10.1097/CCM.0b013e31820eda29[published Online First: Epub Date] |.
- 16 37. Koo DJ, Chaudry IH, Wang P. Kupffer cells are responsible for producing inflammatory cytokines
- 17 and hepatocellular dysfunction during early sepsis. *The Journal of surgical research*
- 18 1999;**83**(2):151-7 doi: 10.1006/jsre.1999.5584[published Online First: Epub Date] |.
- 19
- 20
- 21
- 22
- 23
- 24
- 25
- 26
- 27
- 28
- 29
- 30
- 31
- 32
- 33
- 34
- 35
- 36
- 37
- 38
- 39
- 40
- 41
- 42
- 43
- 44
- 45
- 46
- 47
- 48
- 49
- 50
- 51
- 52
- 53
- 54
- 55
- 56
- 57
- 58
- 59
- 60

peer review only

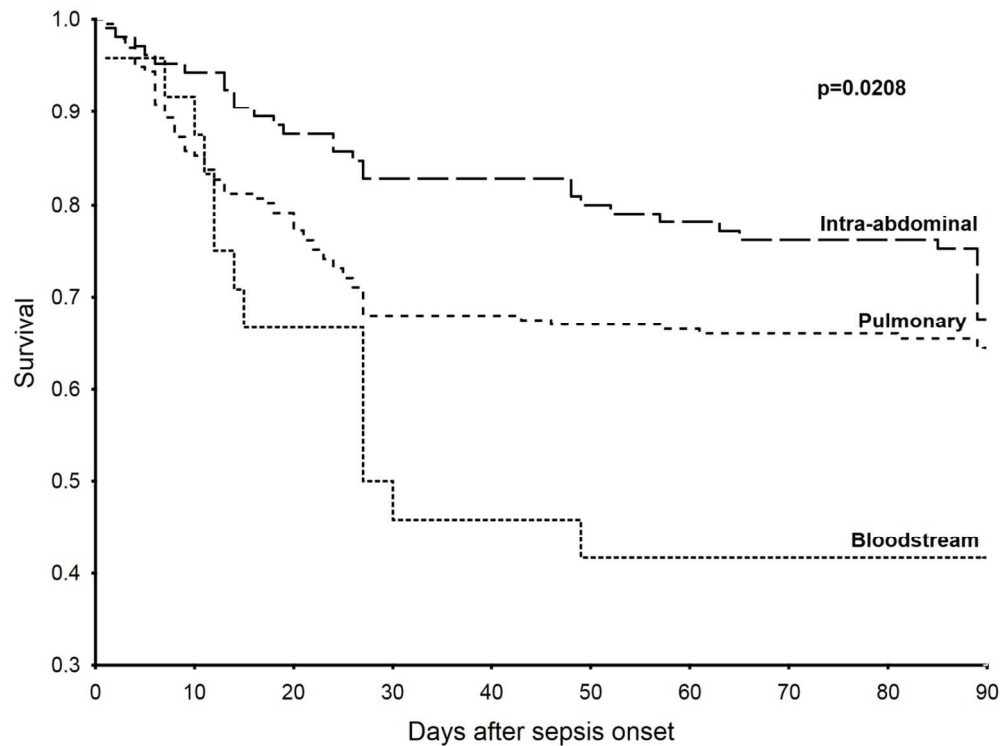

Figure 1. Kaplan-Meier survival:

The Kaplan-Meier curve shows the survival curves until day 90 for the three infection site groups. The mortality risk among the patients under study was higher among the patients with bloodstream infections compared with those in the pulmonary and intra-abdominal infection groups ( $p=0.0208$ , log-rank test).  
119x90mm (300 x 300 DPI)

Supplementary Data; Table 1: Vital parameters, laboratory parameters, kidney parameters and inflammation values

|                                  | Alle<br>n=327  | Fokus Lunge<br>n=198 | Fokus Abdomen<br>n=105 | Fokus Bakteriämie<br>n=24 | P value |
|----------------------------------|----------------|----------------------|------------------------|---------------------------|---------|
| vital parameters, mean ± SD      |                |                      |                        |                           |         |
| Temperature (°C), max            | 37.9±0.5       | 38.0±0.5             | 37.7±0.4               | 37.8±0.6                  | 0.0032  |
| Temperature (°C), min            | 36.8±0.5       | 36.9±0.4             | 36.7±0.5               | 36.6±0.6                  | 0.0054  |
| Heart rate (bpm), max            | 103±12         | 103±12               | 103±11                 | 102±15                    | 0.5067  |
| Heart rate (bpm), min            | 72±11          | 72±11                | 74±11                  | 73±12                     | 0.4774  |
| MAP (mmHg), max                  | 100±11         | 101±12               | 99±10                  | 94±15                     | 0.0781  |
| MAP (mmHg), min                  | 66±9           | 66±9                 | 67±8                   | 62±9                      | 0.0243  |
| Vasopressor (µg/kg/min) (n)      | 10±9<br>(247)  | 10±9<br>(147)        | 10±7<br>(83)           | 10±9<br>(17)              | 0.2268  |
| laboratory parameters, mean ± SD |                |                      |                        |                           |         |
| Lactate (mmol/l)                 | 1.7±1.1        | 1.6±1.0              | 1.7±1.1                | 2.0±1.2                   | 0.1278  |
| Thrombocytes (1000/µl)           | 295±148        | 281±133              | 329±168                | 257±154                   | 0.0344  |
| Quick (%) (n)                    | 83±16<br>(325) | 83±16<br>(196)       | 84±17<br>(105)         | 77±16<br>(24)             | 0.1528  |
| kidney values                    |                |                      |                        |                           |         |
| Urine output (ml/day)            | 3055±1406      | 2900±1281            | 3555±1443              | 2144±1535                 | <0.0001 |
| Urine output (ml/kg/h)           | 1.6±0.8        | 1.5±0.8              | 1.8±0.8                | 0.9±0.6                   | <0.0001 |
| Creatinine (mg/dl)               | 1.3±0.9        | 1.3±0.9              | 1.2±1.0                | 1.6±1.0                   | 0.0148  |
| inflammatory values              |                |                      |                        |                           |         |
| Leukocytes (1000/µl)             | 13±5           | 12±4                 | 15±5                   | 14±5                      | 0.0001  |
| CRP (mg/l) (n)                   | 150±85 (175)   | 141±97 (70)          | 154±69 (90)            | 168±107 (15)              | 0.2159  |
| Procalcitonin (ng/dl) (n)        | 4.8±12.0 (280) | 3.3±9.7 (176)        | 7.4±15.6 (81)          | 7.1±11.3 (23)             | <0.0001 |

CRP=C-reactive protein; MAP=Mean arterial pressure; The data are presented as the mean±SD or percentages. Min and Max indicate the lowest/highest value that has been recorded daily within the observation period.

**Supplementary Data; Table 2. Recorded microbiological findings**

|                               | All<br>n=327 | Pulmonary<br>n=198 | Intra-abdominal<br>n=105 | Bloodstream<br>n=24 |
|-------------------------------|--------------|--------------------|--------------------------|---------------------|
| <b>Bacteria</b>               |              |                    |                          |                     |
| Gram-negative, n (%)          |              |                    |                          |                     |
| Acinetobacter genomospecies 3 | 2 (0.6)      | 2 (1.0)            | 0 (0.0)                  | 0 (0.0)             |
| Bacteroides fragilis          | 11 (3.4)     | 0 (0.0)            | 11 (10.5)                | 0 (0.0)             |
| Bacteroides ovaters           | 2 (0.6)      | 1 (0.5)            | 1 (1.0)                  | 0 (0.0)             |
| Bacteroides species           | 3 (0.9)      | 0 (0.0)            | 3 (2.9)                  | 0 (0.0)             |
| Bacteroides thetaiotaomicron  | 4 (1.2)      | 1 (0.5)            | 3 (2.9)                  | 0 (0.0)             |
| Bacteroides uniformis         | 4 (1.2)      | 0 (0.0)            | 4 (3.8)                  | 0 (0.0)             |
| Chlamydia pneumoniae IgA      | 6 (1.8)      | 6 (3.0)            | 0 (0.0)                  | 0 (0.0)             |
| Chlamydia pneumoniae IgG      | 2 (0.6)      | 1 (0.5)            | 0 (0.0)                  | 1 (4.2)             |
| Chlamydophila pneumoniae      | 2 (0.6)      | 2 (1.0)            | 0 (0.0)                  | 0 (0.0)             |
| Citobacter braakii            | 1 (0.3)      | 0 (0.0)            | 1 (1.0)                  | 0 (0.0)             |
| Citrobacter freundii          | 3 (0.9)      | 2 (1.0)            | 1 (1.0)                  | 0 (0.0)             |
| Citrobacter koseri            | 2 (0.6)      | 1 (0.5)            | 1 (1.0)                  | 0 (0.0)             |
| Enterobacter aerogenes        | 1 (0.3)      | 1 (0.5)            | 0 (0.0)                  | 0 (0.0)             |
| Enterobacter asburiae         | 2 (0.6)      | 1 (0.5)            | 1 (1.0)                  | 0 (0.0)             |
| Enterobacter cloacae          | 22 (6.7)     | 14 (7.0)           | 5 (4.8)                  | 3 (12.5)            |
| ESBL E.coli                   | 5 (1.5)      | 2 (1.0)            | 2 (1.9)                  | 1 (4.2)             |
| Escherichia coli              | 53 (16.2)    | 35 (17.7)          | 15 (14.3)                | 3 (12.5)            |
| Haemophilus influenza         | 12 (3.7)     | 12 (6.1)           | 0 (0.0)                  | 0 (0.0)             |
| Haemophilus parainfluenzae    | 3 (0.9)      | 2 (1.0)            | 1 (1.0)                  | 0 (0.0)             |
| Hafnia alvei                  | 2 (0.6)      | 2 (1.0)            | 0 (0.0)                  | 0 (0.0)             |
| Klebsiella oxytoca            | 8 (2.5)      | 8 (4.0)            | 0 (0.0)                  | 0 (0.0)             |
| Klebsiella pneumoniae         | 13 (4.0)     | 10 (5.1)           | 3 (2.9)                  | 0 (0.0)             |
| Morganella morganii           | 3 (0.9)      | 3 (1.5)            | 0 (0.0)                  | 0 (0.0)             |
| Pantoea agglomerans           | 1 (0.3)      | 1 (0.5)            | 0 (0.0)                  | 0 (0.0)             |
| Proteus mirabilis             | 9 (2.8)      | 8 (4.0)            | 1 (1.0)                  | 0 (0.0)             |
| Proteus species               | 1 (0.3)      | 1 (0.5)            | 0 (0.0)                  | 0 (0.0)             |
| Proteus vulgaris              | 1 (0.3)      | 0 (0.0)            | 1 (1.0)                  | 0 (0.0)             |
| Pseudomonas aeruginosa        | 26 (8.0)     | 20 (10.1)          | 5 (4.8)                  | 1 (4.2)             |
| Pseudomonas korrensis         | 1 (0.3)      | 0 (0.0)            | 0 (0.0)                  | 1 (4.2)             |
| Serratia marcescens           | 8 (2.5)      | 7 (3.5)            | 0 (0.0)                  | 1 (4.2)             |
| Serratia ureilytica           | 1 (0.3)      | 0 (0.0)            | 0 (0.0)                  | 1 (4.2)             |
| Stenotrophomonas maltophilia  | 5 (1.5)      | 3 (1.5)            | 1 (1.0)                  | 1 (4.2)             |
| Gram-positive, n (%)          |              |                    |                          |                     |
| Aerococcus urinae             | 1 (0.3)      | 1 (0.5)            | 0 (0.0)                  | 0 (0.0)             |
| Clostridium difficile         | 5 (1.5)      | 1 (0.5)            | 3 (2.9)                  | 1 (4.2)             |
| Clostridium innocuum          | 1 (0.3)      | 0 (0.0)            | 1 (1.0)                  | 0 (0.0)             |
| Clostridium perfringens       | 3 (0.9)      | 0 (0.0)            | 3 (2.9)                  | 0 (0.0)             |
| Enterococcus avium            | 1 (0.3)      | 0 (0.0)            | 1 (1.0)                  | 0 (0.0)             |
| Enterococcus casseliflavus    | 1 (0.3)      | 0 (0.0)            | 1 (1.0)                  | 0 (0.0)             |
| Enterococcus faecalis         | 33 (10.1)    | 10 (5.1)           | 23 (21.9)                | 0 (0.0)             |
| Enterococcus faecium          | 35 (10.7)    | 4 (2.0)            | 27 (25.7)                | 4 (16.7)            |

|    |                                  |            |           |           |          |
|----|----------------------------------|------------|-----------|-----------|----------|
| 1  |                                  |            |           |           |          |
| 2  |                                  |            |           |           |          |
| 3  | Enterococcus mundtii             | 1 (0.3)    | 0 (0.0)   | 0 (0.0)   | 1 (4.2)  |
| 4  | Enterococcus species             | 29 (8.9)   | 25 (12.6) | 3 (2.9)   | 1 (4.2)  |
| 5  | Coagulase negative Staphylococci | 12 (3.7)   | 8 (4.0)   | 3 (2.9)   | 1 (4.2)  |
| 6  | Lactobacillus paracasei          | 1 (0.3)    | 0 (0.0)   | 1 (1.0)   | 0 (0.0)  |
| 7  | MRSA                             | 6 (1.8)    | 5 (2.5)   | 0 (0.0)   | 1 (4.2)  |
| 8  | Peptostreptococcus species       | 2 (0.6)    | 1 (0.5)   | 1 (1.0)   | 0 (0.0)  |
| 9  | Rothia mucilaginosa              | 1 (0.3)    | 1 (0.5)   | 0 (0.0)   | 0 (0.0)  |
| 10 | Staphylococcus aureus            | 52 (15.9)  | 47 (23.7) | 1 (1.0)   | 4 (16.7) |
| 11 | Staphylococcus capitis           | 7 (2.1)    | 5 (2.5)   | 1 (1.0)   | 1 (4.2)  |
| 12 | Staphylococcus epidermidis       | 36 (11.0)  | 24 (12.1) | 9 (8.6)   | 3 (12.5) |
| 13 | Staphylococcus haemolyticus      | 2 (0.6)    | 2 (1.0)   | 0 (0.0)   | 0 (0.0)  |
| 14 | Staphylococcus hominis           | 4 (1.2)    | 3 (1.5)   | 1 (1.0)   | 0 (0.0)  |
| 15 | Staphylococcus wameryi           | 1 (0.3)    | 1 (0.5)   | 0 (0.0)   | 0 (0.0)  |
| 16 | Streptococcus agalactiae         | 4 (1.2)    | 3 (1.5)   | 1 (1.0)   | 0 (0.0)  |
| 17 | Streptococcus anginosus          | 3 (0.9)    | 0 (0.0)   | 2 (1.9)   | 1 (4.2)  |
| 18 | Streptococcus constellatus       | 5 (1.5)    | 3 (1.5)   | 2 (1.9)   | 0 (0.0)  |
| 19 | Streptococcus pneumoniae         | 4 (1.2)    | 4 (2.0)   | 0 (0.0)   | 0 (0.0)  |
| 20 | Streptococcus viridans           | 2 (0.6)    | 1 (0.5)   | 0 (0.0)   | 1 (4.2)  |
| 21 | Fungi, n (%)                     |            |           |           |          |
| 22 | Aspergillus flavus               | 1 (0.3)    | 1 (0.5)   | 0 (0.0)   | 0 (0.0)  |
| 23 | Aspergillus fumigatus            | 3 (0.9)    | 1 (0.5)   | 1 (1.0)   | 1 (4.2)  |
| 24 | Candida albicans                 | 110 (33.6) | 67 (33.8) | 38 (36.2) | 5 (20.8) |
| 25 | Candida dubliniensis             | 3 (0.9)    | 2 (1.0)   | 1 (1.0)   | 0 (0.0)  |
| 26 | Candida glabrata                 | 25 (7.7)   | 16 (8.0)  | 6 (5.7)   | 3 (12.5) |
| 27 | Candida guilliermondii           | 1 (0.3)    | 0 (0.0)   | 1 (1.0)   | 0 (0.0)  |
| 28 | Candida IgG                      | 3 (0.9)    | 1 (0.5)   | 2 (1.9)   | 0 (0.0)  |
| 29 | Candida krusei                   | 5 (1.5)    | 2 (1.0)   | 2 (1.9)   | 1 (4.2)  |
| 30 | Candida lusitanae                | 1 (0.3)    | 1 (0.5)   | 0 (0.0)   | 0 (0.0)  |
| 31 | Candida palmioleophila           | 1 (0.3)    | 0 (0.0)   | 1 (1.0)   | 0 (0.0)  |
| 32 | Candida parapsilosis             | 4 (1.2)    | 3 (1.5)   | 1 (1.0)   | 0 (0.0)  |
| 33 | Candida tropicalis               | 14 (4.3)   | 6 (3.0)   | 8 (7.6)   | 0 (0.0)  |
| 34 | Viruses, n (%)                   |            |           |           |          |
| 35 | Adenovirus-Ag-IFT                | 1 (0.3)    | 0 (0.0)   | 1 (1.0)   | 0 (0.0)  |
| 36 | CMV                              | 5 (1.5)    | 3 (1.5)   | 1 (1.0)   | 1 (4.2)  |
| 37 | H1N1 (2009 RNA)                  | 1 (0.3)    | 1 (0.5)   | 0 (0.0)   | 0 (0.0)  |
| 38 | H1N1 DNA                         | 4 (1.2)    | 4 (2.0)   | 0 (0.0)   | 0 (0.0)  |
| 39 | HSV                              | 4 (1.2)    | 1 (0.5)   | 2 (1.9)   | 1 (4.2)  |
| 40 | RS-Virusantigen IFT              | 2 (0.6)    | 2 (1.0)   | 0 (0.0)   | 0 (0.0)  |
| 41 | Varizella zoster virus           | 1 (0.3)    | 1 (0.5)   | 0 (0.0)   | 0 (0.0)  |

CMV: Cytomegalovirus; MRSA: Methicillin-resistant Staphylococcus aureus; RS-Virus: Respiratory Syncytial Virus.

**Supplementary Data; Table 3. Anti-infective agents**

|                               | All<br>n=327 | Pulmonary<br>n=198 | Intra-abdominal<br>n=105 | Bloodstream<br>n=24 |
|-------------------------------|--------------|--------------------|--------------------------|---------------------|
| Antibiotics, n (%)            |              |                    |                          |                     |
| Penicillins                   | 168 (51)     | 133 (67)           | 21 (20)                  | 14 (58)             |
| Aminopenicillins              | 43 (13)      | 30 (15)            | 11 (10)                  | 2 (8)               |
| 2. generation cephalosporines | 49 (15)      | 42 (21)            | 4 (3)                    | 3 (12)              |
| 3. generation cephalosporines | 87 (26)      | 60 (30)            | 23 (21)                  | 4 (16)              |
| Carbapenems                   | 215 (65)     | 107 (54)           | 91 (86)                  | 17 (70)             |
| Macrolides                    | 84 (25)      | 70 (35)            | 6 (5)                    | 8 (33)              |
| Aminoglycosides               | 15 (4)       | 7 (3)              | 6 (5)                    | 2 (8)               |
| Fluorchinolones               | 50 (15)      | 29 (14)            | 17 (16)                  | 4 (16)              |
| Imidazoles                    | 38 (11)      | 14 (7)             | 22 (20)                  | 2 (8)               |
| Glycopeptides                 | 125 (38)     | 44 (22)            | 63 (60)                  | 18 (75)             |
| Lipopeptides                  | 2 (0.6)      | 1 (0.5)            | 1 (0.9)                  | 0 (0)               |
| Lincosamides                  | 11 (3)       | 8 (4)              | 1 (0.9)                  | 2 (8)               |
| Oxazolidinones                | 106 (32)     | 60 (30)            | 39 (37)                  | 7 (29)              |
| Glycylcyclines                | 4 (1)        | 0 (0)              | 3 (2)                    | 1 (4)               |
| Rifampicin                    | 4 (1)        | 3 (1)              | 0 (0)                    | 1 (4)               |
| Sulfamethoxazol/Trimethoprim  | 12 (3)       | 7 (3)              | 4 (3)                    | 1 (4)               |
| Antifungals, n (%)            |              |                    |                          |                     |
| Echinocandin                  | 60 (18)      | 25 (12)            | 25 (23)                  | 10 (41)             |
| Triazole derivatives          | 91 (27)      | 22 (11)            | 62 (59)                  | 7 (29)              |
| Polyene                       | 5 (1)        | 5 (2)              | 0 (0)                    | 0 (0)               |
| Antivirals, n (%)             |              |                    |                          |                     |
| Aciclovir                     | 5 (1)        | 3 (1)              | 2 (1)                    | 0 (0)               |
| Ganciclovir/Valganciclovir    | 2 (0.6)      | 1 (0.5)            | 0 (0)                    | 1 (4)               |
| Oseltamivir                   | 4 (1.2)      | 4 (2)              | 0 (0)                    | 0 (0)               |

STROBE 2007 (v4) Statement—Checklist of items that should be included in reports of *cohort studies*

| Section/Topic                | Item # | Recommendation                                                                                                                                                                       | Reported on page # |
|------------------------------|--------|--------------------------------------------------------------------------------------------------------------------------------------------------------------------------------------|--------------------|
| Title and abstract           | 1      | (a) Indicate the study's design with a commonly used term in the title or the abstract                                                                                               | 1                  |
|                              |        | (b) Provide in the abstract an informative and balanced summary of what was done and what was found                                                                                  | 2                  |
| <b>Introduction</b>          |        |                                                                                                                                                                                      |                    |
| Background/rationale         | 2      | Explain the scientific background and rationale for the investigation being reported                                                                                                 | 5                  |
| Objectives                   | 3      | State specific objectives, including any prespecified hypotheses                                                                                                                     | 5                  |
| <b>Methods</b>               |        |                                                                                                                                                                                      |                    |
| Study design                 | 4      | Present key elements of study design early in the paper                                                                                                                              | 6                  |
| Setting                      | 5      | Describe the setting, locations, and relevant dates, including periods of recruitment, exposure, follow-up, and data collection                                                      | 7-8                |
| Participants                 | 6      | (a) Give the eligibility criteria, and the sources and methods of selection of participants. Describe methods of follow-up                                                           | 7-9                |
|                              |        | (b) For matched studies, give matching criteria and number of exposed and unexposed                                                                                                  | 7                  |
| Variables                    | 7      | Clearly define all outcomes, exposures, predictors, potential confounders, and effect modifiers. Give diagnostic criteria, if applicable                                             | 8                  |
| Data sources/<br>measurement | 8*     | For each variable of interest, give sources of data and details of methods of assessment (measurement). Describe comparability of assessment methods if there is more than one group | 8                  |
| Bias                         | 9      | Describe any efforts to address potential sources of bias                                                                                                                            | 8                  |
| Study size                   | 10     | Explain how the study size was arrived at                                                                                                                                            | 8                  |
| Quantitative variables       | 11     | Explain how quantitative variables were handled in the analyses. If applicable, describe which groupings were chosen and why                                                         | 8-9                |
| Statistical methods          | 12     | (a) Describe all statistical methods, including those used to control for confounding                                                                                                | 9                  |
|                              |        | (b) Describe any methods used to examine subgroups and interactions                                                                                                                  | 9                  |
|                              |        | (c) Explain how missing data were addressed                                                                                                                                          | 9                  |
|                              |        | (d) If applicable, explain how loss to follow-up was addressed                                                                                                                       |                    |
|                              |        | (e) Describe any sensitivity analyses                                                                                                                                                | 9                  |
| <b>Results</b>               |        |                                                                                                                                                                                      |                    |



|                          |     |                                                                                                                                                                                                              |       |
|--------------------------|-----|--------------------------------------------------------------------------------------------------------------------------------------------------------------------------------------------------------------|-------|
| Participants             | 13* | (a) Report numbers of individuals at each stage of study—eg numbers potentially eligible, examined for eligibility, confirmed eligible, included in the study, completing follow-up, and analysed            | 10    |
|                          |     | (b) Give reasons for non-participation at each stage                                                                                                                                                         | 7     |
|                          |     | (c) Consider use of a flow diagram                                                                                                                                                                           | 7     |
| Descriptive data         | 14* | (a) Give characteristics of study participants (eg demographic, clinical, social) and information on exposures and potential confounders                                                                     | 10    |
|                          |     | (b) Indicate number of participants with missing data for each variable of interest                                                                                                                          |       |
|                          |     | (c) Summarise follow-up time (eg, average and total amount)                                                                                                                                                  | 12    |
| Outcome data             | 15* | Report numbers of outcome events or summary measures over time                                                                                                                                               | 12    |
| Main results             | 16  | (a) Give unadjusted estimates and, if applicable, confounder-adjusted estimates and their precision (eg, 95% confidence interval). Make clear which confounders were adjusted for and why they were included | 12-13 |
|                          |     | (b) Report category boundaries when continuous variables were categorized                                                                                                                                    | 12    |
|                          |     | (c) If relevant, consider translating estimates of relative risk into absolute risk for a meaningful time period                                                                                             | 13    |
| Other analyses           | 17  | Report other analyses done—eg analyses of subgroups and interactions, and sensitivity analyses                                                                                                               | 13    |
| <b>Discussion</b>        |     |                                                                                                                                                                                                              |       |
| Key results              | 18  | Summarise key results with reference to study objectives                                                                                                                                                     | 15-17 |
| <b>Limitations</b>       |     |                                                                                                                                                                                                              |       |
| Interpretation           | 20  | Give a cautious overall interpretation of results considering objectives, limitations, multiplicity of analyses, results from similar studies, and other relevant evidence                                   | 15-17 |
| Generalisability         | 21  | Discuss the generalisability (external validity) of the study results                                                                                                                                        | 17    |
| <b>Other information</b> |     |                                                                                                                                                                                                              |       |
| Funding                  | 22  | Give the source of funding and the role of the funders for the present study and, if applicable, for the original study on which the present article is based                                                |       |

\*Give information separately for cases and controls in case-control studies and, if applicable, for exposed and unexposed groups in cohort and cross-sectional studies.

**Note:** An Explanation and Elaboration article discusses each checklist item and gives methodological background and published examples of transparent reporting. The STROBE checklist is best used in conjunction with this article (freely available on the Web sites of PLoS Medicine at <http://www.plosmedicine.org/>, Annals of Internal Medicine at <http://www.annals.org/>, and Epidemiology at <http://www.epidem.com/>). Information on the STROBE Initiative is available at [www.strobe-statement.org](http://www.strobe-statement.org).

1  
2  
3 **Primary bacteremia is associated with a higher mortality risk compared with**  
4 **pulmonary and intra-abdominal infections in patients with sepsis: a**  
5 **prospective observational cohort study**  
6  
7  
8  
9

10 Ashham Mansur<sup>1\*</sup>, Yvonne Klee<sup>1</sup>, Aron Frederik Popov<sup>2</sup>, Joachim Erlenwein<sup>1</sup>,  
11 Michael Ghadimi<sup>3</sup>, Tim Beissbarth<sup>4</sup>, Martin Bauer<sup>1</sup>, José Hinz<sup>1</sup>  
12  
13

14  
15  
16  
17 <sup>1</sup>Department of Anesthesiology, University Medical Center, Georg August  
18 University, D-37075 Goettingen, Germany  
19

20 <sup>2</sup>Department of Cardiothoracic Transplantation & Mechanical Support, Royal  
21 Brompton and Harefield Hospital, Harefield, Hill End Road, UB9 6JH London,  
22 United Kingdom  
23  
24

25 <sup>3</sup>Department of General and Visceral Surgery, University Medical Center, Georg  
26 August University, D-37075 Goettingen, Germany  
27

28 <sup>4</sup>Department of Medical Statistics, University Medical Center, Georg August  
29 University, D-37075 Goettingen, Germany  
30  
31  
32  
33  
34

35 **\*Corresponding author:**  
36

37 Dr. Ashham Mansur  
38

39 Medical consultant  
40

41 Dept. of Anesthesiology  
42

43 Georg-August-University, University Medical Center  
44

45 Robert-Koch-Str. 40, 37099 Goettingen, Germany  
46

47 Phone: +49 551 39 7819  
48

49 Fax: +49 551 39 13886  
50

51 E-mail: [ashham.mansur@med.uni-goettingen.de](mailto:ashham.mansur@med.uni-goettingen.de)  
52  
53  
54

55 **Keywords:** Apache II; Pulmonary infection; intra-abdominal infection; intensive  
56 care unit; organ failure marker; SOFA scores  
57

58 **Word count** 3058  
59  
60

**ABSTRACT**

**Objective:** To investigate whether common infection foci (pulmonary, intra-abdominal and primary bacteremia) are associated with variations in mortality risk in sepsis patients.

**Design:** Prospective, observational cohort study.

**Setting:** Three surgical intensive care units (ICU) at a university medical center.

**Participants:** A total of 327 adult Caucasian patients with sepsis originating from pulmonary, intra-abdominal and primary bacteremia participated in this study.

**Primary and secondary outcome measures:** The patients were followed for 90 days, and mortality risk was recorded as the primary outcome variable. To monitor organ failure, sepsis-related organ failure assessment (SOFA) scores were evaluated at the onset of sepsis and throughout the observational period as secondary outcome variables.

**Results:** A total of 327 critically ill patients with sepsis were enrolled in this study. **Kaplan-Meier survival analysis showed that the 90-day mortality risk was** significantly higher among patients with primary bacteremia than among those with pulmonary and intra-abdominal foci **(58%, 35% and 32%, respectively; p=0.0208)**. To exclude the effects of several baseline variables, we performed multivariate Cox regression analysis. Primary bacteremia remained a significant covariate for mortality in the multivariate analysis **(hazard ratio, 2.10; 95% CI, 1.14-3.86; p=0.0166)**. During their stay in the ICU, the patients with primary bacteremia presented significantly higher SOFA scores than those of the patients with pulmonary and intra-abdominal infection foci **(8.5±4.7, 7.3±3.4 and 5.8±3.5, respectively)**. Patients with primary bacteremia presented higher SOFA-renal score compared with the patients with other infection foci **(1.6±1.4, 0.8±1.1 and 0.7±1.0, respectively)**; the primary bacteremia patients required significantly more renal replacement therapy than the patients in the other groups **(29%, 11% and 12%, respectively)**.

1  
2  
3 **Conclusions:** These results indicate that sepsis patients with primary bacteremia present a  
4 higher mortality risk compared with patients with sepsis of pulmonary or intra-abdominal  
5 origins. These results should be assessed in sepsis patients in larger, independent cohorts.  
6  
7  
8  
9  
10  
11  
12  
13  
14  
15  
16  
17  
18  
19  
20  
21  
22  
23  
24  
25  
26  
27  
28  
29  
30  
31  
32  
33  
34  
35  
36  
37  
38  
39  
40  
41  
42  
43  
44  
45  
46  
47  
48  
49  
50  
51  
52  
53  
54  
55  
56  
57  
58  
59  
60

For peer review only

### Strengths and limitations of this study

- This is the first study to evaluate mortality risk among sepsis patients with primary bloodstream infections compared with those with respiratory or intra-abdominal infections over an observational period of 90 days.
- The strengths of our study include that it is the first to investigate organ-specific manifestations associated with common sepsis infection sites (respiratory, intra-abdominal and bloodstream) by quantifying SOFA scores and evaluating the requirements for organ support in the ICU.
- One potentially uncontrolled confounder that was not adjusted for is appropriate antibiotic therapy.

## INTRODUCTION

Sepsis is defined as a systemic inflammatory response that occurs during severe infection[1-3]. Sepsis affects more than 750,000 patients in the United States each year and remains one of the leading causes of death worldwide[4]. Although the incidence of this major health care problem has been increasing, the implementation of early goal-directed therapy in patients with severe sepsis and septic shock has in part successfully reduced mortality[5]. Guidelines for disease control have been written by the Surviving Sepsis Campaign (SSC), a joint collaboration between the Society of Critical Care Medicine and the European Society of Intensive Care Medicine committed to reducing mortality from severe sepsis and septic shock worldwide[6]. These guidelines contain clear recommendations for improving disease outcomes (e.g., guidelines for resuscitation and recommendations pertaining to infections, including for the use of diagnostics, hemodynamic support and adjunctive therapy and for supportive therapy for severe sepsis)[6].

Respiratory, intra-abdominal, urinary and primary bloodstream infections make up 80% of all infection sites[7]. According to epidemiological data, the lung is the most common site of infection, followed by the abdomen and the blood[2].

Pneumonia, hospital-acquired pneumonia (HAP), ventilator-associated pneumonia (VAP) and subsequent sepsis remain important causes of morbidity and mortality in critically ill patients despite advances in antimicrobial therapy, better supportive care modalities, and a wide range of preventive measures[8-10].

Intra-abdominal infections are a common cause of sepsis. These infections comprise a markedly heterogeneous group of infectious processes that share an anatomical site of origin between the diaphragm and the pelvis[11]. Their clinical course is dictated by a number of infection-related factors, including the microbiology of the infection, the anatomical location,

1  
2  
3 the degree of localization, and the presence of correctable anatomical derangements involving  
4  
5 intra-abdominal viscera[12 13].  
6  
7

8 Bloodstream infections (BSIs) are a major cause of death due to nosocomial events in  
9  
10 intensive care units (ICUs)[14]. Immunosuppression and invasive health care procedures act  
11  
12 together to create a high risk of nosocomial BSIs in critically ill patients[15]. The outcomes of  
13  
14 BSIs have been the focus of many case-control and cohort studies[15-17]. BSIs lead to poor  
15  
16 patient outcomes[16 18], prolonged patient stays in the ICU and in the hospital[16 19 20], and  
17  
18 substantial extra medical costs[21 22].  
19  
20  
21

22 Whether the characteristics of the infection, infection site and pathogenic organism  
23  
24 independently affect the outcome in patients with sepsis remains a subject of debate. Whereas  
25  
26 previous studies have shown an independent, significant contribution of the infection site and  
27  
28 the pathogenic organism to the survival of sepsis patients[23], recent investigations have not  
29  
30 found any significant impact of the infection site on mortality among patients with sepsis[24].  
31  
32  
33

34 This study aimed to explore whether common origins of sepsis infections, in particular  
35  
36 respiratory, intra-abdominal and bloodstream infection sites, are associated with changes in  
37  
38 the 90-day survival rate among patients with sepsis in a representative university medical  
39  
40 center, where patients are treated according to the most recent sepsis guidelines.  
41  
42  
43  
44  
45  
46  
47  
48  
49  
50  
51  
52  
53  
54  
55  
56  
57  
58  
59  
60

## MATERIALS AND METHODS

### Patients

Adult Caucasian patients admitted to ICUs at the University Medical Center-Goettingen (UMG) between April 2012 and May 2013 were screened daily according to the American College of Chest Physicians/Society of Critical Care Medicine (ACCP/SCCM) criteria for sepsis, severe sepsis, or septic shock[25 26]. This study was approved by the University of Goettingen ethics committee in Goettingen, Germany (1/15/12) and conformed to the ethical principles of the Declaration of Helsinki (Seoul, 2008). For each patient, written, informed consent was obtained from either the patient or his or her legal representative. Patients were enrolled if they presented sepsis of a respiratory, intra-abdominal or primary bloodstream origin. Caucasian origin was assessed by questioning the patients, their next of kin or their legal representatives.

### Definitions

In this study, patients with sepsis of respiratory origin had hospital-acquired pneumonia (HAP) or ventilator-associated pneumonia (VAP). HAP is the most frequent infection in surgical intensive care units and is defined as a pulmonary infection that was not incubating at the time of admission and that occurred at least 48 h after hospital admission[27]. Ventilator-associated pneumonia (VAP) is defined as either a pulmonary infection arising more than 48 h after tracheal intubation with no evidence of pneumonia at the time of intubation or the diagnosis of a new pulmonary infection if the initial ICU admission was due to pneumonia[27].

Typically, patients with intra-abdominal infections in the surgical ICU develop secondary peritonitis as a result of microbial infection of the peritoneal space following perforation, abscess formation, ischemic necrosis, or a penetrating injury of the intra-abdominal contents[11].



1  
2  
3 Primary BSI comprises BSI of unknown origin in patients without an identifiable focus of  
4 infection and intravascular BSI (related to the presence of a catheter, implantable  
5 cardioverter-defibrillator or pacemaker)[11].  
6  
7

### 8 9 **Exclusion criteria**

10 As described previously[28 29], the patient exclusion criteria were the following: (1) age less  
11 than 18 years; (2) being pregnant or nursing an infant; (3) immunosuppressive therapy (e.g.,  
12 cyclosporine or azathioprine) or cancer-related chemotherapy; (4) documented or suspected  
13 acute myocardial infarction within the previous 6 weeks; (5) a history of New York Heart  
14 Association functional class IV chronic heart failure; (6) human immunodeficiency virus  
15 infection; (7) a do not resuscitate or do not treat order or the patient and/or his or her legal  
16 representative not being committed to aggressive management; (8) not being expected to  
17 survive the 28-day observation period or not being likely to be placed on life support because  
18 of an uncorrectable medical condition, including a poorly controlled neoplasm or end-stage  
19 lung disease; (9) a chronic vegetative state or a similar long-term neurological condition; (10)  
20 current participation in any interventional study (of a drug or device); (11) inability to be fully  
21 evaluated during the study period; and (12) being a study-site employee or a family member  
22 of a study-site employee involved in conducting this study.  
23  
24  
25  
26  
27  
28  
29  
30  
31  
32  
33  
34  
35  
36  
37  
38  
39  
40  
41  
42  
43  
44  
45  
46  
47  
48  
49  
50  
51  
52  
53  
54  
55  
56  
57  
58  
59  
60

### Data collection

Patients were followed up for 90 days, and mortality risk was recorded as the primary outcome variable. Sequential Organ Failure Assessment (SOFA)[30] and Acute Physiology and Chronic Health Evaluation (APACHE) II[31] scores were evaluated at the onset of sepsis. Organ function was reassessed over 28 days in the ICU to monitor morbidity as previously described[28]. Organ failure, organ support requirements and the length of ICU stay were recorded as secondary outcome variables. All relevant clinical data were extracted from the electronic patient record system (IntelliSpace Critical Care and Anesthesia (ICCA); Philips Healthcare, USA); all medical records, including microbiology reports, can be found in this system. We sought to determine whether patients suffered from preexisting conditions, for example, comorbidities, by examining physicians' notes, administering an anamnestic questionnaire to the patients or their legal representatives and consulting each patient's family doctor.

### Statistical analyses

Statistical analyses were performed using Statistica software (version 10; StatSoft, Tulsa, Oklahoma, USA). Based on contingency tables, significance was calculated using two-sided Fisher's exact or chi-square tests, as appropriate. Two continuous variables were compared using the Mann-Whitney test. Time-to-event data were compared using the log-rank test from the Statistica package for Kaplan-Meier survival analysis. For variables identified as significant in univariate survival analyses (respiratory infections, intra-abdominal infections and primary bacteremia), potential confounders (age, gender and BMI) and covariates that varied at baseline (diabetes mellitus (IDDM), history of cancer and "No history of surgery"), we performed multivariate Cox regression analysis to examine survival times. A value of  $p < 0.05$  was considered statistically significant.

## RESULTS

### Study population

A total of 327 adult Caucasian patients with sepsis were enrolled in this study. At enrollment, 61% of the patients had a pulmonary infection; 32% suffered from an intra-abdominal infection; and 7% presented with a primary bloodstream infection (Table 1). Patients' ages ranged from 19 to 91 years (median, 65 years). At baseline, patients' SOFA and APACHE II scores, which measure disease severity, were  $9.3 \pm 4.0$  and  $21.5 \pm 7.3$ , respectively (Table 1). Comorbidities included hypertension, myocardial infarction history, chronic obstructive pulmonary disease (COPD), renal dysfunction, non-insulin-dependent diabetes mellitus, insulin-dependent diabetes mellitus, chronic liver diseases, history of cancer, and a history of stroke (Table 1).

**Table 1. Patient baseline characteristics with regard to the infection site**

|                                  | All<br>n=327   | Pulmonary<br>n=198 | Intra-abdominal<br>n=105 | Bloodstream<br>n=24 | p-value |
|----------------------------------|----------------|--------------------|--------------------------|---------------------|---------|
| Age, mean $\pm$ SD               | 62 $\pm$ 15    | 61 $\pm$ 15        | 65 $\pm$ 13              | 60 $\pm$ 16         | 0.2426  |
| Male, %                          | 67%            | 70                 | 61                       | 62                  | 0.2614  |
| Body mass index, mean $\pm$ SD   | 27 $\pm$ 6     | 27 $\pm$ 7         | 27 $\pm$ 5               | 29 $\pm$ 5          | 0.0885  |
| SOFA score, mean $\pm$ SD        | 9.3 $\pm$ 4.0  | 9.4 $\pm$ 3.6      | 8.9 $\pm$ 4.7            | 10.5 $\pm$ 5.1      | 0.3099  |
| APACHE II score, mean $\pm$ SD   | 21.5 $\pm$ 7.3 | 21.8 $\pm$ 6.8     | 20.6 $\pm$ 8.1           | 22.8 $\pm$ 7.6      | 0.3538  |
| Organ support, %                 |                |                    |                          |                     |         |
| Mechanical ventilation           | 85             | 90                 | 74                       | 87                  | 0.0008  |
| Use of vasopressor               | 64             | 62                 | 65                       | 70                  | 0.6778  |
| Renal replacement therapy        | 8              | 7                  | 9                        | 20                  | 0.0781  |
| Comorbidities, %                 |                |                    |                          |                     |         |
| Hypertension                     | 57             | 55                 | 59                       | 66                  | 0.5395  |
| History of myocardial infarction | 8              | 9                  | 7                        | 8                   | 0.9087  |
| COPD                             | 17             | 17                 | 17                       | 16                  | 0.9880  |
| Renal dysfunction                | 11             | 10                 | 9                        | 25                  | 0.0857  |
| Diabetes mellitus (NIDDM)        | 9              | 10                 | 8                        | 8                   | 0.8928  |
| Diabetes mellitus (IDDM)         | 11             | 8                  | 11                       | 33                  | 0.0015  |
| Chronic liver diseases           | 5              | 3                  | 8                        | 8                   | 0.1538  |
| History of cancer                | 18             | 15                 | 30                       | 0                   | 0.0003  |
| History of stroke                | 6              | 8                  | 4                        | 0                   | 0.2192  |
| Recent surgical history, %       |                |                    |                          |                     |         |
| Elective surgery                 | 30             | 27                 | 37                       | 25                  | 0.1730  |
| Emergency surgery                | 48             | 45                 | 56                       | 42                  | 0.1401  |

1  
2  
3  
4  
5  
6  
7  
8  
9  
10  
11  
12  
13  
14  
15  
16  
17  
18  
19  
20  
21  
22  
23  
24  
25  
26  
27  
28  
29  
30  
31  
32  
33  
34  
35  
36  
37  
38  
39  
40  
41  
42  
43  
44  
45  
46  
47  
48  
49  
50  
51  
52  
53  
54  
55  
56  
57  
58  
59  
60

---

|                       |    |    |   |    |         |
|-----------------------|----|----|---|----|---------|
| No history of surgery | 21 | 28 | 7 | 33 | <0.0001 |
|-----------------------|----|----|---|----|---------|

---

The data are presented as the means±SDs or percentages.

For peer review only

### Disease severity at the onset of sepsis

No differences in age, gender, or body mass index were found among the three groups of study subjects. Moreover, no differences were found in the SOFA and APACHE II scores with respect to the infection sites at the onset of sepsis. The patients in the group with intra-abdominal infections required significantly less mechanical ventilation compared with the other groups with pulmonary and bloodstream infections (74%, 90% and 87%, respectively). The patients with bloodstream infections suffered significantly more from insulin-dependent diabetes mellitus compared with patients with pulmonary or intra-abdominal infections (33%, 8%, 11%, respectively). In contrast, none of the patients with bloodstream infections had a history of cancer, unlike the patients with pulmonary and intra-abdominal infections (15% and 30%, respectively; Table 1).

## Mortality analysis

Kaplan-Meier survival analysis showed that the 90-day mortality risk was significantly higher among patients with primary bacteremia than among those with pulmonary and intra-abdominal foci (58%, 35% and 32%, respectively; Figure 1). Analysis of the 28-day mortality data similarly revealed that the patients with bloodstream infections had a significantly increased risk of death compared with the patients with pulmonary and intra-abdominal infections (50%, 32% and 17%, respectively; Table 2). Moreover, 90-day mortality analysis suggested a higher incidence of death among the patients with bloodstream infections, although this finding was not significant ( $p=0.0544$ ; Table 2).

**Table 2. Disease severity with regard to infection site**

|                              | All<br>n=327 | Pulmonary<br>n=198 | Intra-abdominal<br>n=105 | Bloodstream<br>n=24 | p-value |
|------------------------------|--------------|--------------------|--------------------------|---------------------|---------|
| SOFA                         | 6.9±3.6      | 7.3±3.4            | 5.8±3.5                  | 8.5±4.7             | 0.0002  |
| SOFA Subscores               |              |                    |                          |                     |         |
| SOFA-Respiratory             | 1.9±0.7      | 2.2±0.6            | 1.5±0.7                  | 1.9±0.9             | <0.0001 |
| SOFA-Cardiovascular          | 1.5±0.9      | 1.5±0.9            | 1.3±0.9                  | 1.7±1.2             | 0.4567  |
| SOFA-Central nervous system  | 1.8±1.1      | 2.1±1.0            | 1.4±1.0                  | 2.0±1.2             | <0.0001 |
| SOFA-Renal                   | 0.8±1.1      | 0.8±1.1            | 0.7±1.0                  | 1.6±1.4             | 0.0028  |
| SOFA-Coagulation             | 0.3±0.5      | 0.3±0.6            | 0.2±0.5                  | 0.6±0.8             | 0.4662  |
| SOFA-Hepatic                 | 0.4±0.7      | 0.3±0.6            | 0.5±0.8                  | 0.5±0.6             | 0.0030  |
| Organ support*, %            |              |                    |                          |                     |         |
| Mechanical ventilation       |              | 85                 | 62                       | 76                  | <0.0001 |
| Use of vasopressor           |              | 54                 | 45                       | 49                  | 0.8355  |
| Renal replacement therapy    |              | 11                 | 12                       | 29                  | 0.0069  |
| Length of stay in ICU (days) | 18±15        | 17±14              | 20±16                    | 16±13               | 0.5061  |
| Mortality analysis, %:       |              |                    |                          |                     |         |
| Death by day 28              | 94 (28)      | 64 (32)            | 18 (17)                  | 12 (50)             | 0.0012  |
| Death by day 90              | 118 (36)     | 70 (35)            | 34 (32)                  | 14 (58)             | 0.0544  |

The data are presented as means±SDs or percentages.

\*Based on the total number of observations during the follow-up period.

## Multivariate analysis

To exclude the effects of several baseline variables on survival among the three groups being investigated, we performed multivariate Cox regression analysis. Bloodstream infection remained a significant covariate for mortality in the multivariate analysis (hazard ratio, 2.10; 95% CI, 1.14-3.86;  $p=0.0166$ ; Table 3). This finding indicates that, despite baseline differences in some variables (i.e., IDDM, Cancer and “No history of surgery”), the presence of a primary bloodstream infection remains a prognostic variable with a significant effect on the outcome (90-day survival; Table 3).

**Table 3. Cox regression analysis**

| Infection site   | Variable                  | Hazard ratio | 95% CI    | p-value |
|------------------|---------------------------|--------------|-----------|---------|
| Pulmonary:       |                           |              |           |         |
|                  | Age                       | 1.02         | 1.00-1.03 | 0.0009  |
|                  | Gender                    | 1.19         | 0.80-1.76 | 0.3803  |
|                  | BMI                       | 1.00         | 0.97-1.03 | 0.7058  |
|                  | Diabetes mellitus (IDDM)  | 1.29         | 0.75-2.19 | 0.3450  |
|                  | History of cancer         | 1.26         | 0.81-1.95 | 0.2921  |
|                  | No history of surgery     | 1.37         | 0.87-2.14 | 0.1634  |
|                  | Pulmonary infection       | 1.05         | 0.72-1.55 | 0.7675  |
| Intra-abdominal: |                           |              |           |         |
|                  | Age                       | 1.02         | 1.00-1.03 | 0.0007  |
|                  | Gender                    | 1.17         | 0.79-1.73 | 0.4302  |
|                  | BMI                       | 1.00         | 0.97-1.03 | 0.6497  |
|                  | Diabetes mellitus (IDDM)  | 1.28         | 0.75-2.16 | 0.3534  |
|                  | History of cancer         | 1.33         | 0.85-2.06 | 0.2036  |
|                  | No history of surgery     | 1.25         | 0.80-1.97 | 0.3209  |
|                  | Intra-abdominal infection | 0.71         | 0.46-1.08 | 0.1142  |
| Bloodstream:     |                           |              |           |         |
|                  | Age                       | 1.02         | 1.01-1.03 | 0.0007  |
|                  | Gender                    | 1.18         | 0.80-1.75 | 0.3956  |
|                  | BMI                       | 1.00         | 0.97-1.03 | 0.7930  |
|                  | Diabetes mellitus (IDDM)  | 1.07         | 0.61-1.88 | 0.7877  |
|                  | History of cancer         | 1.36         | 0.87-2.12 | 0.1719  |
|                  | No history of surgery     | 1.30         | 0.84-2.02 | 0.2290  |
|                  | Bloodstream infection     | 2.10         | 1.14-3.86 | 0.0166  |

### Disease severity

During the observational period, patients with bloodstream infections presented significantly higher mean SOFA scores compared with patients in the other groups ( $8.5\pm 4.7$ ,  $7.3\pm 3.4$  and  $5.8\pm 3.5$ , respectively; Table 2). Four of the six organ-specific SOFA scores (respiratory,



central nervous system (CNS), renal and hepatic) varied significantly among the study groups. The patients with pulmonary infections presented higher SOFA-respiratory scores than did patients with intra-abdominal and bloodstream infections ( $2.2\pm 0.6$ ,  $1.5\pm 0.7$  and  $1.9\pm 0.9$ , respectively; Table 2), and together with the patients with bloodstream infections, required more mechanical ventilation than patients with intra-abdominal infections (85%, 76% and 62%, respectively; Table 2). The patients with pulmonary and bloodstream infections presented higher SOFA-CNS scores than those of the patients with intra-abdominal infections ( $2.1\pm 1.0$ ,  $2.0\pm 1.2$  and  $1.4\pm 1.0$ , respectively; Table 2). Analysis of the SOFA-renal scores indicated that the patients with bloodstream infections presented higher SOFA-renal scores over the study period in the ICU compared with the patients with pulmonary and intra-abdominal infections ( $1.6\pm 1.4$ ,  $0.8\pm 1.1$  and  $0.7\pm 1.0$ , respectively; Table 2). These patients also required significantly more renal replacement therapy (29%, 11% and 12%, respectively; Table 2). The SOFA-hepatic score was significantly higher in the patients with intra-abdominal and bloodstream infections compared with the patients with pulmonary infections ( $0.5\pm 0.8$ ,  $0.5\pm 0.6$  and  $0.3\pm 0.6$ , respectively; Table 2).

In addition, the gram-negative infection rate was significantly higher among the patients with pulmonary infections (75%) compared with those whose sepsis had intra-abdominal and bloodstream infection origins (57% and 54%, respectively; Table 4).

**Table 4. Infection types over the observational period**

| Infection site         | Pulmonary | Intra-abdominal | Bloodstream | p-value |
|------------------------|-----------|-----------------|-------------|---------|
| Infection type         |           |                 |             |         |
| Gram-negative bacteria | 75%       | 57%             | 54%         | 0.0026  |
| Gram-positive bacteria | 78%       | 84%             | 79%         | 0.5142  |
| Fungus                 | 52%       | 76%             | 42%         | <0.0001 |
| Virus                  | 0.08%     | 0.06%           | 0.13%       | 0.4941  |

Furthermore, septic patients with intra-abdominal infections presented a higher incidence of fungal infections (76%) compared with the patients with pulmonary and bloodstream infections (52% and 42%, respectively; Table 4).

## DISCUSSION

The present study addressed whether common infection sites among patients with sepsis are associated with the survival rate.

The primary endpoint, the mortality risk within 90 days of the onset of sepsis, was higher in patients with primary bloodstream infections compared with those with respiratory or intra-abdominal infections (58%, 35% and 32%, respectively; Fig. 1). Primary bacteremia remained a significant covariate for mortality in the multivariate analysis (Table 3).

According to the SOFA and APACHE II scores, the infection site was not associated with the acute-illness severity at the onset of sepsis (Table 1). We believe that the similarity in SOFA and APACHE II scores at sepsis onset among the three groups can be attributed to the phenotypic heterogeneity of sepsis. This heterogeneity is affected by several factors, including the causative organism of the infection and the amount of time elapsed since the infection began, as well as by individual patient characteristics, such as comorbidities and genetic makeup[28].

The most significant result of this study with respect to 90-day mortality risk was that the mortality rate (58%) was higher among patients with primary bloodstream infections; this result is in agreement with the results of several previous investigations that found similar mortality rates in patients with nosocomial bloodstream infections; e.g., Garrouste-Orgeas et al. found that patients with nosocomial BSI had a mortality rate of 61.5%[14 15]. Our study also goes beyond previous investigations by evaluating a longer-term end point (90 days); this end point was investigated because sepsis patients continue to face an increased risk of mortality, even after ICU and hospital discharge[32].

Severe morbidity, quantified by the SOFA mean score in patients with primary bloodstream infections, resulted in an increased 28-day mortality rate compared with the patients with pulmonary and intra-abdominal infections (50%, 32% and 17%, respectively; Table 2).

1  
2  
3 The strengths of our study include that it is the first to investigate organ-specific  
4 manifestations associated with common sepsis infection sites (respiratory, intra-abdominal  
5 and bloodstream) by quantifying SOFA scores and evaluating the requirements for organ  
6 support in the ICU (Table 2). The more pronounced types of respiratory failure, which are  
7 quantified by the SOFA-respiratory score and the need for mechanical ventilation (Table 2),  
8 among patients with pulmonary infections are plausible because these patients frequently  
9 present compromised pulmonary function. Patients with primary bacteremia are also at a high  
10 risk of respiratory failure due to systemic inflammatory response syndrome, release of pro-  
11 inflammatory cytokines (such as tumor necrosis factor (TNF), IL-1 and IL-6,[33]) and  
12 recruitment of neutrophils to the lungs, which induces the release of toxic mediators, such as  
13 reactive oxygen species and proteases, thus contributing to lung damage and respiratory  
14 failure[34].

15  
16 We believe that the difference in the SOFA-CNS score between the genotypes (with higher  
17 scores in the respiratory and the bloodstream groups) occurred because patients in these  
18 groups required much more mechanical ventilation, causing them to be treated more  
19 frequently with sedating medication, which impacts the CNS and thus affects the SOFA-CNS  
20 score.

21  
22 The observed distinct renal failure among bloodstream infection patients indicated by the  
23 SOFA-renal score, which was accompanied by frequent renal replacement therapy (Table 2),  
24 was in accordance with former observations indicating that bloodstream infections are  
25 associated with a higher incidence of renal failure[35]. The frequent utilization of renal  
26 replacement therapy suggests persistent organ dysfunction, which is a well-known contributor  
27 to sepsis-related mortality and may explain the higher mortality among bloodstream infection  
28 patients observed in our study (Table 2, Figure 1)[36].

29  
30 The SOFA-hepatic score was higher among patients with intra-abdominal and primary  
31 bloodstream infections compared with patients with pulmonary infections (Table 2). This

1  
2  
3 result can be attributed to the fact that Kupffer cells release several cytokines able to induce  
4 hepatocellular dysfunction in response to endotoxemia in patients with bloodstream  
5 infections[37].  
6  
7

8  
9  
10 There are some limitations to this study, along with potential confounding. One limitation to  
11 this study is the possibility of selection bias; for example, the patients in this study may have  
12 had a higher mortality rate in general than septic patients in other ICUs (e.g., in secondary  
13 medical care centers) because patients admitted to our surgical ICUs frequently had more  
14 severe coexisting diseases than did patients in other ICUs (non-tertiary care center ICUs). A  
15 second potential limitation to this study is measurement bias. For example, many clinical  
16 parameters (e.g., blood pressure, heart rate, and respiratory frequency) were registered  
17 automatically in the electronic patient record system, and we cannot guarantee that all  
18 registered clinical parameters were always correct because of potential measurement errors.  
19 However, we did check all clinical records for plausibility before conducting our statistical  
20 analysis. Finally, one uncontrolled confounder that was not adjusted for is appropriate  
21 antibiotic therapy; although patients with clinical signs of infection were routinely promptly  
22 given antibiotic therapy, data regarding the exact times at which patients received antibiotic  
23 doses after sepsis onset are unavailable.  
24  
25  
26  
27  
28  
29  
30  
31  
32  
33  
34  
35  
36  
37  
38  
39

40 To the best of our knowledge, this investigation is the first to evaluate 90-day survival rates  
41 with respect to common sepsis infection sites (respiratory, intra-abdominal and primary  
42 bloodstream). This study revealed a significantly higher mortality rate among patients with  
43 primary bloodstream infections (58%) compared with patients with respiratory and intra-  
44 abdominal infections, although all patients were treated according to current guidelines for the  
45 treatment of sepsis (Surviving Sepsis Campaign)[6]. Because of this dramatically higher  
46 mortality rate among patients with primary bloodstream sepsis, we believe that future sepsis  
47 trials should focus on this vulnerable group of high-risk patients. More appropriate  
48 interventions and further improvements in prevention and care are urgently needed.  
49  
50  
51  
52  
53  
54  
55  
56  
57  
58  
59  
60

1  
2  
3 **Acknowledgments** The authors thank the staff of the ICUs of the Department of  
4 Anesthesiology and the Department of General and Visceral Surgery, all of whom were  
5 involved in patient care. The authors also thank Benjamin Liese, Simon Wilmers, Chang Ho  
6 Hong, Sebastian Gerber and Maximillian Steinau for their dedicated help with the data  
7 collection for this study. This study was supported by the German Research Foundation  
8 (DFG) and the Open Access Publication Funds of Göttingen University.  
9  
10  
11  
12  
13  
14  
15  
16  
17

18 **Contributors** All authors contributed to the study design, data acquisition (clinical and  
19 experimental), or the analysis and interpretation of data. Specifically, YK collected clinical  
20 data and participated in the statistical analysis and interpretation of the data. AP, JE, MG and  
21 MB contributed to the study design, supervised patient enrollment and clinical data  
22 monitoring and interpreted data. TB contributed to the study design and conception and  
23 performed and approved the statistical analyses. AM and JH designed the study, supervised  
24 the sample and data collection, interpreted the data and drafted the manuscript. All authors  
25 were involved either in writing or revising the manuscript. All authors have approved the final  
26 version of the manuscript.  
27  
28  
29  
30  
31  
32  
33  
34  
35  
36  
37  
38  
39

40 **Funding:** None.

41 **Competing interests:** None.  
42  
43  
44  
45  
46

47 **Ethics approval:** This study was approved by the University of Goettingen ethics committee  
48 in Goettingen, Germany (1/15/12).  
49  
50  
51  
52  
53  
54  
55  
56  
57  
58  
59  
60

## REFERENCES

1. Vincent JL, Rello J, Marshall J, et al. International study of the prevalence and outcomes of infection in intensive care units. *JAMA :A: the journal of the American Medical Association* 2009;**302**(21):2323-9 doi: 10.1001/jama.2009.1754[published Online First: Epub Date]].
2. Vincent JL, Sakr Y, Sprung CL, et al. Sepsis in European intensive care units: results of the SOAP study. *Critical care medicine* 2006;**34**(2):344-53
3. O'Brien JM, Jr., Ali NA, Aberegg SK, Abraham E. Sepsis. *The American journal of medicine* 2007;**120**(12):1012-22 doi: 10.1016/j.amjmed.2007.01.035[published Online First: Epub Date]].
4. Angus DC, Linde-Zwirble WT, Lidicker J, Clermont G, Carcillo J, Pinsky MR. Epidemiology of severe sepsis in the United States: analysis of incidence, outcome, and associated costs of care. *Critical care medicine* 2001;**29**(7):1303-10
5. Rivers E, Nguyen B, Havstad S, et al. Early goal-directed therapy in the treatment of severe sepsis and septic shock. *The New England journal of medicine* 2001;**345**(19):1368-77 doi: 10.1056/NEJMoa010307[published Online First: Epub Date]].
6. Dellinger RP, Levy MM, Rhodes A, et al. Surviving sepsis campaign: international guidelines for management of severe sepsis and septic shock: 2012. *Critical care medicine* 2013;**41**(2):580-637 doi: 10.1097/CCM.0b013e31827e83af[published Online First: Epub Date]].
7. Alberti C, Brun-Buisson C, Burchardi H, et al. Epidemiology of sepsis and infection in ICU patients from an international multicentre cohort study. *Intensive care medicine* 2002;**28**(2):108-21 doi: 10.1007/s00134-001-1143-z[published Online First: Epub Date]].
8. Hospital-acquired pneumonia in adults: diagnosis, assessment of severity, initial antimicrobial therapy, and preventive strategies. A consensus statement, American Thoracic Society, November 1995. *American journal of respiratory and critical care medicine* 1996;**153**(5):1711-25 doi: 10.1164/ajrccm.153.5.8630626[published Online First: Epub Date]].
9. Craven DE, Kunches LM, Kilinsky V, Lichtenberg DA, Make BJ, McCabe WR. Risk factors for pneumonia and fatality in patients receiving continuous mechanical ventilation. *The American review of respiratory disease* 1986;**133**(5):792-6
10. Niederman MS. Guidelines for the management of respiratory infection: why do we need them, how should they be developed, and can they be useful? *Current opinion in pulmonary medicine* 1996;**2**(3):161-5
11. Calandra T, Cohen J, International Sepsis Forum Definition of Infection in the ICUCC. The international sepsis forum consensus conference on definitions of infection in the intensive care unit. *Critical care medicine* 2005;**33**(7):1538-48
12. Evans HL, Raymond DP, Pelletier SJ, Crabtree TD, Pruett TL, Sawyer RG. Diagnosis of intra-abdominal infection in the critically ill patient. *Current opinion in critical care* 2001;**7**(2):117-21
13. Marshall JC, Innes M. Intensive care unit management of intra-abdominal infection. *Critical care medicine* 2003;**31**(8):2228-37 doi: 10.1097/01.ccm.0000087326.59341.51[published Online First: Epub Date]].
14. Timsit JF, Laupland KB. Update on bloodstream infections in ICUs. *Current opinion in critical care* 2012;**18**(5):479-86 doi: 10.1097/MCC.0b013e328356cefe[published Online First: Epub Date]].
15. Garrouste-Orgeas M, Timsit JF, Tafflet M, et al. Excess risk of death from intensive care unit-acquired nosocomial bloodstream infections: a reappraisal. *Clinical infectious diseases :s: an official publication of the Infectious Diseases Society of America* 2006;**42**(8):1118-26 doi: 10.1086/500318[published Online First: Epub Date]].
16. Pittet D, Tarara D, Wenzel RP. Nosocomial bloodstream infection in critically ill patients. Excess length of stay, extra costs, and attributable mortality. *JAMA :A: the journal of the American Medical Association* 1994;**271**(20):1598-601

17. Renaud B, Brun-Buisson C, Group IC-BS. Outcomes of primary and catheter-related bacteremia. A cohort and case-control study in critically ill patients. *American journal of respiratory and critical care medicine* 2001;**163**(7):1584-90 doi: 10.1164/ajrccm.163.7.9912080[published Online First: Epub Date]].
18. Klevens RM, Edwards JR, Richards CL, Jr., et al. Estimating health care-associated infections and deaths in U.S. hospitals, 2002. *Public health reports (Washington, D.C. :. : 1974)* 2007;**122**(2):160-6
19. Digiovine B, Chenoweth C, Watts C, Higgins M. The attributable mortality and costs of primary nosocomial bloodstream infections in the intensive care unit. *American journal of respiratory and critical care medicine* 1999;**160**(3):976-81 doi: 10.1164/ajrccm.160.3.9808145[published Online First: Epub Date]].
20. Rello J, Ochagavia A, Sabanes E, et al. Evaluation of outcome of intravenous catheter-related infections in critically ill patients. *American journal of respiratory and critical care medicine* 2000;**162**(3 Pt 1):1027-30 doi: 10.1164/ajrccm.162.3.9911093[published Online First: Epub Date]].
21. Perencevich EN, Stone PW, Wright SB, et al. Raising standards while watching the bottom line: making a business case for infection control. *Infection control and hospital epidemiology :y: the official journal of the Society of Hospital Epidemiologists of America* 2007;**28**(10):1121-33 doi: 10.1086/521852[published Online First: Epub Date]].
22. Lin MY, Hota B, Khan YM, et al. Quality of traditional surveillance for public reporting of nosocomial bloodstream infection rates. *JAMA :A: the journal of the American Medical Association* 2010;**304**(18):2035-41 doi: 10.1001/jama.2010.1637[published Online First: Epub Date]].
23. Cohen J, Cristofaro P, Carlet J, Opal S. New method of classifying infections in critically ill patients. *Critical care medicine* 2004;**32**(7):1510-26
24. Zahar JR, Timsit JF, Garrouste-Orgeas M, et al. Outcomes in severe sepsis and patients with septic shock: pathogen species and infection sites are not associated with mortality. *Critical care medicine* 2011;**39**(8):1886-95 doi: 10.1097/CCM.0b013e31821b827c[published Online First: Epub Date]].
25. Bone RC, Balk RA, Cerra FB, et al. Definitions for sepsis and organ failure and guidelines for the use of innovative therapies in sepsis. The ACCP/SCCM Consensus Conference Committee. American College of Chest Physicians/Society of Critical Care Medicine. 1992. *Chest* 2009;**136**(5 Suppl):e28
26. Levy MM, Fink MP, Marshall JC, et al. 2001 SCCM/ESICM/ACCP/ATS/SIS International Sepsis Definitions Conference. *Critical care medicine* 2003;**31**(4):1250-6 doi: 10.1097/01.ccm.0000050454.01978.3b[published Online First: Epub Date]].
27. American Thoracic S, Infectious Diseases Society of A. Guidelines for the management of adults with hospital-acquired, ventilator-associated, and healthcare-associated pneumonia. *American journal of respiratory and critical care medicine* 2005;**171**(4):388-416 doi: 10.1164/rccm.200405-644ST[published Online First: Epub Date]].
28. Mansur A, von Gruben L, Popov AF, et al. The regulatory toll-like receptor 4 genetic polymorphism rs11536889 is associated with renal, coagulation and hepatic organ failure in sepsis patients. *Journal of translational medicine* 2014;**12**:177 doi: 10.1186/1479-5876-12-177[published Online First: Epub Date]].
29. Mansur A, Hinz J, Hillebrecht B, et al. Ninety-day survival rate of patients with sepsis relates to programmed cell death 1 genetic polymorphism rs11568821. *Journal of investigative medicine :e: the official publication of the American Federation for Clinical Research* 2014;**62**(3):638-43 doi: 10.231/jim.0000000000000059[published Online First: Epub Date]].
30. Vincent JL, de Mendonca A, Cantraine F, et al. Use of the SOFA score to assess the incidence of organ dysfunction/failure in intensive care units: results of a multicenter, prospective study. Working group on "sepsis-related problems" of the European Society of Intensive Care Medicine. *Critical care medicine* 1998;**26**(11):1793-800



- 1
- 2
- 3 31. Knaus WA, Draper EA, Wagner DP, Zimmerman JE. APACHE II: a severity of disease classification
- 4 system. *Critical care medicine* 1985;**13**(10):818-29
- 5 32. Khamisi R. Execution of sepsis trials needs an overhaul, experts say. *Nature medicine*
- 6 2012;**18**(7):998-9 doi: 10.1038/nm0712-998b[published Online First: Epub Date] |.
- 7 33. Martin TR. Lung cytokines and ARDS: Roger S. Mitchell Lecture. *Chest* 1999;**116**(1 Suppl):2S-8S
- 8 34. Windsor AC, Mullen PG, Fowler AA, Sugerman HJ. Role of the neutrophil in adult respiratory
- 9 distress syndrome. *The British journal of surgery* 1993;**80**(1):10-7
- 10 35. Shmueli H, Pitlik S, Drucker M, Samra Z, Konisberger H, Leibovici L. Prediction of mortality in
- 11 patients with bacteremia: the importance of pre-existing renal insufficiency. *Renal failure*
- 12 2000;**22**(1):99-108
- 13 36. Vincent JL, Nelson DR, Williams MD. Is worsening multiple organ failure the cause of death in
- 14 patients with severe sepsis? *Critical care medicine* 2011;**39**(5):1050-5 doi:
- 15 10.1097/CCM.0b013e31820eda29[published Online First: Epub Date] |.
- 16 37. Koo DJ, Chaudry IH, Wang P. Kupffer cells are responsible for producing inflammatory cytokines
- 17 and hepatocellular dysfunction during early sepsis. *The Journal of surgical research*
- 18 1999;**83**(2):151-7 doi: 10.1006/jsre.1999.5584[published Online First: Epub Date] |.
- 19
- 20
- 21
- 22
- 23
- 24
- 25
- 26
- 27
- 28
- 29
- 30
- 31
- 32
- 33
- 34
- 35
- 36
- 37
- 38
- 39
- 40
- 41
- 42
- 43
- 44
- 45
- 46
- 47
- 48
- 49
- 50
- 51
- 52
- 53
- 54
- 55
- 56
- 57
- 58
- 59
- 60

peer review only



# BMJ Open

## Primary bacteremia is associated with a higher mortality risk compared with pulmonary and intra-abdominal infections in patients with sepsis: a prospective observational cohort study



|                                 |                                                                                                                                                                                                                                                                                                                                                                                                                                                                                                                                                                                                                                                                                                                                                                                                                                                                          |
|---------------------------------|--------------------------------------------------------------------------------------------------------------------------------------------------------------------------------------------------------------------------------------------------------------------------------------------------------------------------------------------------------------------------------------------------------------------------------------------------------------------------------------------------------------------------------------------------------------------------------------------------------------------------------------------------------------------------------------------------------------------------------------------------------------------------------------------------------------------------------------------------------------------------|
| Journal:                        | <i>BMJ Open</i>                                                                                                                                                                                                                                                                                                                                                                                                                                                                                                                                                                                                                                                                                                                                                                                                                                                          |
| Manuscript ID:                  | bmjopen-2014-006616.R2                                                                                                                                                                                                                                                                                                                                                                                                                                                                                                                                                                                                                                                                                                                                                                                                                                                   |
| Article Type:                   | Research                                                                                                                                                                                                                                                                                                                                                                                                                                                                                                                                                                                                                                                                                                                                                                                                                                                                 |
| Date Submitted by the Author:   | 07-Nov-2014                                                                                                                                                                                                                                                                                                                                                                                                                                                                                                                                                                                                                                                                                                                                                                                                                                                              |
| Complete List of Authors:       | Mansur, Ashham; University Medical Center, Georg August University, Department of Anaesthesiology<br>Klee, Yvonne; University Medical Center, Georg August University, Department of Anaesthesiology<br>Popov, Aron; Royal Brompton and Harefield Hospital, Department of Cardiothoracic Transplantation & Mechanical Support<br>Erlenwein, Joachim; University Medical Center, Georg August University, Department of Anaesthesiology<br>Ghadimi, Michael; University Medical Center, Georg August University, Department of General and Visceral Surgery<br>Beissbarth, Tim; University Medical Center, Georg August University, Department of Medical Statistics<br>Bauer, Martin; University Medical Center, Georg August University, Department of Anaesthesiology<br>Hinz, José; University Medical Center, Georg August University, Department of Anaesthesiology |
| <b>Primary Subject Heading</b>: | Intensive care                                                                                                                                                                                                                                                                                                                                                                                                                                                                                                                                                                                                                                                                                                                                                                                                                                                           |
| Secondary Subject Heading:      | Anaesthesia                                                                                                                                                                                                                                                                                                                                                                                                                                                                                                                                                                                                                                                                                                                                                                                                                                                              |
| Keywords:                       | Adult intensive & critical care < INTENSIVE & CRITICAL CARE, Adult surgery < SURGERY, Adult anaesthesia < ANAESTHETICS                                                                                                                                                                                                                                                                                                                                                                                                                                                                                                                                                                                                                                                                                                                                                   |
|                                 |                                                                                                                                                                                                                                                                                                                                                                                                                                                                                                                                                                                                                                                                                                                                                                                                                                                                          |

SCHOLARONE™  
Manuscripts

1  
2  
3 **Primary bacteremia is associated with a higher mortality risk compared with**  
4 **pulmonary and intra-abdominal infections in patients with sepsis: a**  
5 **prospective observational cohort study**  
6  
7  
8  
9

10 Ashham Mansur<sup>1\*</sup>, Yvonne Klee<sup>1</sup>, Aron Frederik Popov<sup>2</sup>, Joachim Erlenwein<sup>1</sup>,  
11 Michael Ghadimi<sup>3</sup>, Tim Beissbarth<sup>4</sup>, Martin Bauer<sup>1</sup>, José Hinz<sup>1</sup>  
12  
13

14  
15  
16  
17 <sup>1</sup>Department of Anesthesiology, University Medical Center, Georg August  
18 University, D-37075 Goettingen, Germany  
19

20  
21 <sup>2</sup>Department of Cardiothoracic Transplantation & Mechanical Support, Royal  
22 Brompton and Harefield Hospital, Harefield, Hill End Road, UB9 6JH London,  
23 United Kingdom  
24

25 <sup>3</sup>Department of General and Visceral Surgery, University Medical Center, Georg  
26 August University, D-37075 Goettingen, Germany  
27

28 <sup>4</sup>Department of Medical Statistics, University Medical Center, Georg August  
29 University, D-37075 Goettingen, Germany  
30  
31  
32  
33  
34

35 **\*Corresponding author:**  
36

37 Dr. Ashham Mansur  
38

39 Medical consultant  
40

41 Dept. of Anesthesiology  
42

43 Georg-August-University, University Medical Center  
44

45 Robert-Koch-Str. 40, 37099 Goettingen, Germany  
46

47 Phone: +49 551 39 7819  
48

49 Fax: +49 551 39 13886  
50

51 E-mail: [ashham.mansur@med.uni-goettingen.de](mailto:ashham.mansur@med.uni-goettingen.de)  
52  
53  
54

55 **Keywords:** Apache II; Pulmonary infection; intra-abdominal infection; intensive  
56 care unit; organ failure marker; SOFA scores  
57

58 **Word count** 3058  
59  
60

## ABSTRACT

**Objective:** To investigate whether common infection foci (pulmonary, intra-abdominal and primary bacteremia) are associated with variations in mortality risk in sepsis patients.

**Design:** Prospective, observational cohort study.

**Setting:** Three surgical intensive care units (ICU) at a university medical center.

**Participants:** A total of 327 adult Caucasian patients with sepsis originating from pulmonary, intra-abdominal and primary bacteremia participated in this study.

**Primary and secondary outcome measures:** The patients were followed for 90 days, and mortality risk was recorded as the primary outcome variable. To monitor organ failure, sepsis-related organ failure assessment (SOFA) scores were evaluated at the onset of sepsis and throughout the observational period as secondary outcome variables.

**Results:** A total of 327 critically ill patients with sepsis were enrolled in this study. Kaplan-Meier survival analysis showed that the 90-day mortality risk was significantly higher among patients with primary bacteremia than among those with pulmonary and intra-abdominal foci (58%, 35% and 32%, respectively;  $p=0.0208$ ). To exclude the effects of several baseline variables, we performed multivariate Cox regression analysis. Primary bacteremia remained a significant covariate for mortality in the multivariate analysis (hazard ratio, 2.10; 95% CI, 1.14-3.86;  $p=0.0166$ ). During their stay in the ICU, the patients with primary bacteremia presented significantly higher SOFA scores than those of the patients with pulmonary and intra-abdominal infection foci ( $8.5\pm 4.7$ ,  $7.3\pm 3.4$  and  $5.8\pm 3.5$ , respectively). Patients with primary bacteremia presented higher SOFA-renal score compared with the patients with other infection foci ( $1.6\pm 1.4$ ,  $0.8\pm 1.1$  and  $0.7\pm 1.0$ , respectively); the primary bacteremia patients required significantly more renal replacement therapy than the patients in the other groups (29%, 11% and 12%, respectively).

1  
2  
3 **Conclusions:** These results indicate that sepsis patients with primary bacteremia present a  
4 higher mortality risk compared with patients with sepsis of pulmonary or intra-abdominal  
5 origins. These results should be assessed in sepsis patients in larger, independent cohorts.  
6  
7  
8  
9  
10  
11  
12  
13  
14  
15  
16  
17  
18  
19  
20  
21  
22  
23  
24  
25  
26  
27  
28  
29  
30  
31  
32  
33  
34  
35  
36  
37  
38  
39  
40  
41  
42  
43  
44  
45  
46  
47  
48  
49  
50  
51  
52  
53  
54  
55  
56  
57  
58  
59  
60

For peer review only

### Strengths and limitations of this study

- This is the first study to evaluate mortality risk among sepsis patients with primary bloodstream infections compared with those with respiratory or intra-abdominal infections over an observational period of 90 days.
- The strengths of our study include that it is the first to investigate organ-specific manifestations associated with common sepsis infection sites (respiratory, intra-abdominal and bloodstream) by quantifying SOFA scores and evaluating the requirements for organ support in the ICU.
- One potentially uncontrolled confounder that was not adjusted for is appropriate antibiotic therapy.

## INTRODUCTION

Sepsis is defined as a systemic inflammatory response that occurs during severe infection[1-3]. Sepsis affects more than 750,000 patients in the United States each year and remains one of the leading causes of death worldwide[4]. Although the incidence of this major health care problem has been increasing, the implementation of early goal-directed therapy in patients with severe sepsis and septic shock has in part successfully reduced mortality[5]. Guidelines for disease control have been written by the Surviving Sepsis Campaign (SSC), a joint collaboration between the Society of Critical Care Medicine and the European Society of Intensive Care Medicine committed to reducing mortality from severe sepsis and septic shock worldwide[6]. These guidelines contain clear recommendations for improving disease outcomes (e.g., guidelines for resuscitation and recommendations pertaining to infections, including for the use of diagnostics, hemodynamic support and adjunctive therapy and for supportive therapy for severe sepsis)[6].

Respiratory, intra-abdominal, urinary and primary bloodstream infections make up 80% of all infection sites[7]. According to epidemiological data, the lung is the most common site of infection, followed by the abdomen and the blood[2].

Pneumonia, hospital-acquired pneumonia (HAP), ventilator-associated pneumonia (VAP) and subsequent sepsis remain important causes of morbidity and mortality in critically ill patients despite advances in antimicrobial therapy, better supportive care modalities, and a wide range of preventive measures[8-10].

Intra-abdominal infections are a common cause of sepsis. These infections comprise a markedly heterogeneous group of infectious processes that share an anatomical site of origin between the diaphragm and the pelvis[11]. Their clinical course is dictated by a number of infection-related factors, including the microbiology of the infection, the anatomical location,

1  
2  
3 the degree of localization, and the presence of correctable anatomical derangements involving  
4  
5 intra-abdominal viscera[12 13].  
6  
7

8 Bloodstream infections (BSIs) are a major cause of death due to nosocomial events in  
9  
10 intensive care units (ICUs)[14]. Immunosuppression and invasive health care procedures act  
11  
12 together to create a high risk of nosocomial BSIs in critically ill patients[15]. The outcomes of  
13  
14 BSIs have been the focus of many case-control and cohort studies[15-17]. BSIs lead to poor  
15  
16 patient outcomes[16 18], prolonged patient stays in the ICU and in the hospital[16 19 20], and  
17  
18 substantial extra medical costs[21 22].  
19  
20

21  
22 Whether the characteristics of the infection, infection site and pathogenic organism  
23  
24 independently affect the outcome in patients with sepsis remains a subject of debate. Whereas  
25  
26 previous studies have shown an independent, significant contribution of the infection site and  
27  
28 the pathogenic organism to the survival of sepsis patients[23], recent investigations have not  
29  
30 found any significant impact of the infection site on mortality among patients with sepsis[24].  
31  
32

33  
34 This study aimed to explore whether common origins of sepsis infections, in particular  
35  
36 respiratory, intra-abdominal and bloodstream infection sites, are associated with changes in  
37  
38 the 90-day survival rate among patients with sepsis in a representative university medical  
39  
40 center, where patients are treated according to the most recent sepsis guidelines.  
41  
42  
43  
44  
45  
46  
47  
48  
49  
50  
51  
52  
53  
54  
55  
56  
57  
58  
59  
60

## MATERIALS AND METHODS

### Patients

Adult Caucasian patients admitted to ICUs at the University Medical Center-Goettingen (UMG) between April 2012 and May 2013 were screened daily according to the American College of Chest Physicians/Society of Critical Care Medicine (ACCP/SCCM) criteria for sepsis, severe sepsis, or septic shock[25 26]. This study was approved by the University of Goettingen ethics committee in Goettingen, Germany (1/15/12) and conformed to the ethical principles of the Declaration of Helsinki (Seoul, 2008). For each patient, written, informed consent was obtained from either the patient or his or her legal representative. Patients were enrolled if they presented sepsis of a respiratory, intra-abdominal or primary bloodstream origin. Because interracial genetic differences may affect the clinical course of infectious diseases, we have exclusively recruited Caucasians, who form the majority of patients admitted to our surgical ICUs, into this clinical investigation. Caucasian origin was assessed by questioning the patients, their next of kin or their legal representatives.

### Definitions

In this study, patients with sepsis of respiratory origin had hospital-acquired pneumonia (HAP) or ventilator-associated pneumonia (VAP). HAP is the most frequent infection in surgical intensive care units and is defined as a pulmonary infection that was not incubating at the time of admission and that occurred at least 48 h after hospital admission[27]. Ventilator-associated pneumonia (VAP) is defined as either a pulmonary infection arising more than 48 h after tracheal intubation with no evidence of pneumonia at the time of intubation or the diagnosis of a new pulmonary infection if the initial ICU admission was due to pneumonia[27].

Typically, patients with intra-abdominal infections in the surgical ICU develop secondary peritonitis as a result of microbial infection of the peritoneal space following perforation,



1  
2  
3 abscess formation, ischemic necrosis, or a penetrating injury of the intra-abdominal  
4 contents[11].  
5

6  
7 Primary BSI comprises BSI of unknown origin in patients without an identifiable focus of  
8 infection, and intravascular catheter-related BSI (catheter, implantable cardioverter-  
9 defibrillator or pacemaker related); according to The International Sepsis Forum Consensus  
10 Conference on Definitions of Infection in the Intensive Care Unit[11].  
11  
12  
13  
14

### 15 **Exclusion criteria**

16  
17 As described previously[28 29], the patient exclusion criteria were the following: (1) age less  
18 than 18 years; (2) being pregnant or nursing an infant; (3) immunosuppressive therapy (e.g.,  
19 cyclosporine or azathioprine) or cancer-related chemotherapy; (4) documented or suspected  
20 acute myocardial infarction within the previous 6 weeks; (5) a history of New York Heart  
21 Association functional class IV chronic heart failure; (6) human immunodeficiency virus  
22 infection; (7) a do not resuscitate or do not treat order or the patient and/or his or her legal  
23 representative not being committed to aggressive management; (8) not being expected to  
24 survive the 28-day observation period or not being likely to be placed on life support because  
25 of an uncorrectable medical condition, including a poorly controlled neoplasm or end-stage  
26 lung disease; (9) a chronic vegetative state or a similar long-term neurological condition; (10)  
27 current participation in any interventional study (of a drug or device); (11) inability to be fully  
28 evaluated during the study period; and (12) being a study-site employee or a family member  
29 of a study-site employee involved in conducting this study.  
30  
31  
32  
33  
34  
35  
36  
37  
38  
39  
40  
41  
42  
43  
44  
45  
46  
47  
48  
49  
50  
51  
52  
53  
54  
55  
56  
57  
58  
59  
60

### Data collection

Patients were followed up for 90 days, and mortality risk was recorded as the primary outcome variable. Sequential Organ Failure Assessment (SOFA)[30] and Acute Physiology and Chronic Health Evaluation (APACHE) II[31] scores were evaluated at the onset of sepsis. Organ function was reassessed over 28 days in the ICU to monitor morbidity as previously described[28]. Organ failure, organ support requirements and the length of ICU stay were recorded as secondary outcome variables. All relevant clinical data were extracted from the electronic patient record system (IntelliSpace Critical Care and Anesthesia (ICCA); Philips Healthcare, Andover, Massachusetts, USA); all medical records, including microbiology reports, can be found in this system. We sought to determine whether patients suffered from preexisting conditions, for example, comorbidities, by examining physicians' notes, administering an anamnestic questionnaire to the patients or their legal representatives and consulting each patient's family doctor.

### Statistical analyses

Statistical analyses were performed using Statistica software (version 10; StatSoft, Tulsa, Oklahoma, USA). Based on contingency tables, significance was calculated using two-sided Fisher's exact or chi-square tests, as appropriate. Two continuous variables were compared using the Mann-Whitney test. Time-to-event data were compared using the log-rank test from the Statistica package for Kaplan-Meier survival analysis. For variables identified as significant in univariate survival analyses (respiratory infections, intra-abdominal infections and primary bacteremia), potential confounders (age, gender and BMI) and covariates that varied at baseline (diabetes mellitus (IDDM), history of cancer and "No history of surgery"), we performed multivariate Cox regression analysis to examine survival times. A value of  $p < 0.05$  was considered statistically significant.

## RESULTS

### Study population

A total of 327 adult Caucasian patients with sepsis were enrolled in this study. At enrollment, 61% of the patients had a pulmonary infection; 32% suffered from an intra-abdominal infection; and 7% presented with a primary bloodstream infection (Table 1). Patients' ages ranged from 19 to 91 years (median, 65 years). At baseline, patients' SOFA and APACHE II scores, which measure disease severity, were  $9.3\pm 4.0$  and  $21.5\pm 7.3$ , respectively (Table 1). Comorbidities included hypertension, myocardial infarction history, chronic obstructive pulmonary disease (COPD), renal dysfunction, non-insulin-dependent diabetes mellitus, insulin-dependent diabetes mellitus, chronic liver diseases, history of cancer, and a history of stroke (Table 1). Many patients were discharged before 90 days. We were able to follow all of these patients. If the patient or legal representative could not be reached by telephone or mail, we confidentially contacted the local registry office and inquired whether the patient was still alive (still registered).

**Table 1. Patient baseline characteristics with regard to the infection site**

|                                  | All<br>n=327   | Pulmonary<br>n=198 | Intra-abdominal<br>n=105 | Bloodstream<br>n=24 | p-value |
|----------------------------------|----------------|--------------------|--------------------------|---------------------|---------|
| Age, mean $\pm$ SD               | 62 $\pm$ 15    | 61 $\pm$ 15        | 65 $\pm$ 13              | 60 $\pm$ 16         | 0.2426  |
| Male, %                          | 67%            | 70                 | 61                       | 62                  | 0.2614  |
| Body mass index, mean $\pm$ SD   | 27 $\pm$ 6     | 27 $\pm$ 7         | 27 $\pm$ 5               | 29 $\pm$ 5          | 0.0885  |
| SOFA score, mean $\pm$ SD        | 9.3 $\pm$ 4.0  | 9.4 $\pm$ 3.6      | 8.9 $\pm$ 4.7            | 10.5 $\pm$ 5.1      | 0.3099  |
| APACHE II score, mean $\pm$ SD   | 21.5 $\pm$ 7.3 | 21.8 $\pm$ 6.8     | 20.6 $\pm$ 8.1           | 22.8 $\pm$ 7.6      | 0.3538  |
| Organ support, %                 |                |                    |                          |                     |         |
| Mechanical ventilation           | 85             | 90                 | 74                       | 87                  | 0.0008  |
| Use of vasopressor               | 64             | 62                 | 65                       | 70                  | 0.6778  |
| Renal replacement therapy        | 8              | 7                  | 9                        | 20                  | 0.0781  |
| Comorbidities, %                 |                |                    |                          |                     |         |
| Hypertension                     | 57             | 55                 | 59                       | 66                  | 0.5395  |
| History of myocardial infarction | 8              | 9                  | 7                        | 8                   | 0.9087  |
| COPD                             | 17             | 17                 | 17                       | 16                  | 0.9880  |
| Renal dysfunction                | 11             | 10                 | 9                        | 25                  | 0.0857  |
| Diabetes mellitus (NIDDM)        | 9              | 10                 | 8                        | 8                   | 0.8928  |
| Diabetes mellitus (IDDM)         | 11             | 8                  | 11                       | 33                  | 0.0015  |

|                            |    |    |    |    |         |
|----------------------------|----|----|----|----|---------|
| Chronic liver diseases     | 5  | 3  | 8  | 8  | 0.1538  |
| History of cancer          | 18 | 15 | 30 | 0  | 0.0003  |
| History of stroke          | 6  | 8  | 4  | 0  | 0.2192  |
| Recent surgical history, % |    |    |    |    |         |
| Elective surgery           | 30 | 27 | 37 | 25 | 0.1730  |
| Emergency surgery          | 48 | 45 | 56 | 42 | 0.1401  |
| No history of surgery      | 21 | 28 | 7  | 33 | <0.0001 |

The data are presented as the means±SDs or percentages. NIDDM, non-insulin-dependent diabetes mellitus; IDDM, insulin-dependent diabetes mellitus.

For peer review only

### Disease severity at the onset of sepsis

No differences in age, gender, or body mass index were found among the three groups of study subjects. Moreover, no differences were found in the SOFA and APACHE II scores with respect to the infection sites at the onset of sepsis. The patients in the group with intra-abdominal infections required significantly less mechanical ventilation compared with the other groups with pulmonary and bloodstream infections (74%, 90% and 87%, respectively). The patients with bloodstream infections suffered significantly more from insulin-dependent diabetes mellitus compared with patients with pulmonary or intra-abdominal infections (33%, 8%, 11%, respectively). In contrast, none of the patients with bloodstream infections had a history of cancer, unlike the patients with pulmonary and intra-abdominal infections (15% and 30%, respectively; Table 1).

## Mortality analysis

Kaplan-Meier survival analysis showed that the 90-day mortality risk was significantly higher among patients with primary bacteremia than among those with pulmonary and intra-abdominal foci (58%, 35% and 32%, respectively; Figure 1). Analysis of the 28-day mortality data similarly revealed that the patients with bloodstream infections had a significantly increased risk of death compared with the patients with pulmonary and intra-abdominal infections (50%, 32% and 17%, respectively; Table 2). Moreover, 90-day mortality analysis suggested a higher incidence of death among the patients with bloodstream infections, although this finding was not significant ( $p=0.0544$ ; Table 2).

**Table 2. Disease severity with regard to infection site**

|                              | All<br>n=327 | Pulmonary<br>n=198 | Intra-abdominal<br>n=105 | Bloodstream<br>n=24 | p-value |
|------------------------------|--------------|--------------------|--------------------------|---------------------|---------|
| SOFA                         | 6.9±3.6      | 7.3±3.4            | 5.8±3.5                  | 8.5±4.7             | 0.0002  |
| SOFA Subscores               |              |                    |                          |                     |         |
| SOFA-Respiratory             | 1.9±0.7      | 2.2±0.6            | 1.5±0.7                  | 1.9±0.9             | <0.0001 |
| SOFA-Cardiovascular          | 1.5±0.9      | 1.5±0.9            | 1.3±0.9                  | 1.7±1.2             | 0.4567  |
| SOFA-Central nervous system  | 1.8±1.1      | 2.1±1.0            | 1.4±1.0                  | 2.0±1.2             | <0.0001 |
| SOFA-Renal                   | 0.8±1.1      | 0.8±1.1            | 0.7±1.0                  | 1.6±1.4             | 0.0028  |
| SOFA-Coagulation             | 0.3±0.5      | 0.3±0.6            | 0.2±0.5                  | 0.6±0.8             | 0.4662  |
| SOFA-Hepatic                 | 0.4±0.7      | 0.3±0.6            | 0.5±0.8                  | 0.5±0.6             | 0.0030  |
| Organ support*, (%):         |              |                    |                          |                     |         |
| Mechanical ventilation       |              | 85                 | 62                       | 76                  | <0.0001 |
| Use of vasopressor           |              | 54                 | 45                       | 49                  | 0.8355  |
| Renal replacement therapy    |              | 11                 | 12                       | 29                  | 0.0069  |
| Length of stay in ICU (days) | 18±15        | 17±14              | 20±16                    | 16±13               | 0.5061  |
| Mortality analysis, (%):     |              |                    |                          |                     |         |
| Death by day 28              | 94 (28)      | 64 (32)            | 18 (17)                  | 12 (50)             | 0.0012  |
| Death by day 90              | 118 (36)     | 70 (35)            | 34 (32)                  | 14 (58)             | 0.0544  |

The data are presented as means±SDs or percentages.

\*Based on the total number of observations during the follow-up period.

## Multivariate analysis

To exclude the effects of several baseline variables on survival among the three groups being investigated, we performed multivariate Cox regression analysis. Bloodstream infection remained a significant covariate for mortality in the multivariate analysis (hazard ratio, 2.10; 95% CI, 1.14-3.86;  $p=0.0166$ ; Table 3). This finding indicates that, despite baseline differences in some variables (i.e., IDDM, Cancer and “No history of surgery”), the presence of a primary bloodstream infection remains a prognostic variable with a significant effect on the outcome (90-day survival; Table 3).

**Table 3. Cox regression analysis**

| Infection site   | Variable                  | Hazard ratio | 95% CI    | p-value |
|------------------|---------------------------|--------------|-----------|---------|
| Pulmonary:       |                           |              |           |         |
|                  | Age                       | 1.02         | 1.00-1.03 | 0.0009  |
|                  | Gender                    | 1.19         | 0.80-1.76 | 0.3803  |
|                  | BMI                       | 1.00         | 0.97-1.03 | 0.7058  |
|                  | Diabetes mellitus (IDDM)  | 1.29         | 0.75-2.19 | 0.3450  |
|                  | History of cancer         | 1.26         | 0.81-1.95 | 0.2921  |
|                  | No history of surgery     | 1.37         | 0.87-2.14 | 0.1634  |
|                  | Pulmonary infection       | 1.05         | 0.72-1.55 | 0.7675  |
| Intra-abdominal: |                           |              |           |         |
|                  | Age                       | 1.02         | 1.00-1.03 | 0.0007  |
|                  | Gender                    | 1.17         | 0.79-1.73 | 0.4302  |
|                  | BMI                       | 1.00         | 0.97-1.03 | 0.6497  |
|                  | Diabetes mellitus (IDDM)  | 1.28         | 0.75-2.16 | 0.3534  |
|                  | History of cancer         | 1.33         | 0.85-2.06 | 0.2036  |
|                  | No history of surgery     | 1.25         | 0.80-1.97 | 0.3209  |
|                  | Intra-abdominal infection | 0.71         | 0.46-1.08 | 0.1142  |
| Bloodstream:     |                           |              |           |         |
|                  | Age                       | 1.02         | 1.01-1.03 | 0.0007  |
|                  | Gender                    | 1.18         | 0.80-1.75 | 0.3956  |
|                  | BMI                       | 1.00         | 0.97-1.03 | 0.7930  |
|                  | Diabetes mellitus (IDDM)  | 1.07         | 0.61-1.88 | 0.7877  |
|                  | History of cancer         | 1.36         | 0.87-2.12 | 0.1719  |
|                  | No history of surgery     | 1.30         | 0.84-2.02 | 0.2290  |
|                  | Bloodstream infection     | 2.10         | 1.14-3.86 | 0.0166  |

### Disease severity

During the observational period, patients with bloodstream infections presented significantly higher mean SOFA scores compared with patients in the other groups ( $8.5\pm 4.7$ ,  $7.3\pm 3.4$  and  $5.8\pm 3.5$ , respectively; Table 2). Four of the six organ-specific SOFA scores (respiratory,



1  
2  
3 central nervous system (CNS), renal and hepatic) varied significantly among the study groups.  
4  
5 The patients with pulmonary infections presented higher SOFA-respiratory scores than did  
6  
7 patients with intra-abdominal and bloodstream infections ( $2.2\pm 0.6$ ,  $1.5\pm 0.7$  and  $1.9\pm 0.9$ ,  
8  
9 respectively; Table 2). The patients with pulmonary and bloodstream infections required more  
10  
11 mechanical ventilation than patients with intra-abdominal infections (85%, 76% and 62%,  
12  
13 respectively; Table 2). Patients with mechanical ventilation usually received lung-protective  
14  
15 ventilation (Tidal volume of 6–8 ml/kg predicted body weight) and were treated according to  
16  
17 structured weaning protocols of the ICUs. Weaning protocols included daily trials of  
18  
19 spontaneous breathing, gradual reduction in pressure support and use of non-invasive  
20  
21 mechanical ventilation for extubated patients. The patients with pulmonary and bloodstream  
22  
23 infections presented higher SOFA-CNS scores than those of the patients with intra-abdominal  
24  
25 infections ( $2.1\pm 1.0$ ,  $2.0\pm 1.2$  and  $1.4\pm 1.0$ , respectively; Table 2). Analysis of the SOFA-renal  
26  
27 scores indicated that the patients with bloodstream infections presented higher SOFA-renal  
28  
29 scores over the study period in the ICU compared with the patients with pulmonary and intra-  
30  
31 abdominal infections ( $1.6\pm 1.4$ ,  $0.8\pm 1.1$  and  $0.7\pm 1.0$ , respectively; Table 2). These patients  
32  
33 also required significantly more renal replacement therapy (29%, 11% and 12%, respectively;  
34  
35 Table 2). The SOFA-hepatic score was significantly higher in the patients with intra-  
36  
37 abdominal and bloodstream infections compared with the patients with pulmonary infections  
38  
39 ( $0.5\pm 0.8$ ,  $0.5\pm 0.6$  and  $0.3\pm 0.6$ , respectively; Table 2). Additional results regarding disease  
40  
41 severity were added to the supplemental data (see online supplementary data; Table 1).

42  
43 In addition, the gram-negative infection rate was significantly higher among the patients with  
44  
45 pulmonary infections (75%) compared with those whose sepsis had intra-abdominal and  
46  
47 bloodstream infection origins (57% and 54%, respectively; Table 4). Additional results  
48  
49 regarding microbiological findings and anti-infective therapy were added to the supplemental  
50  
51 data (see online supplementary data, Table 2 and Table 3; respectively).  
52  
53  
54  
55  
56  
57

#### 58 **Table 4. Infection types over the observational period**

| Infection site         | Pulmonary | Intra-abdominal | Bloodstream | p-value |
|------------------------|-----------|-----------------|-------------|---------|
| Infection type         |           |                 |             |         |
| Gram-negative bacteria | 75%       | 57%             | 54%         | 0.0026  |
| Gram-positive bacteria | 78%       | 84%             | 79%         | 0.5142  |
| Fungus                 | 52%       | 76%             | 42%         | <0.0001 |
| Virus                  | 0.08%     | 0.06%           | 0.13%       | 0.4941  |

Furthermore, septic patients with intra-abdominal infections presented a higher incidence of fungal infections (76%) compared with the patients with pulmonary and bloodstream infections (52% and 42%, respectively; Table 4). In this study, blood cultures and cultures of samples from other sites, such as urine, cerebrospinal fluid, surgical wounds, respiratory secretions, or other body fluids that may be the source of infection, were taken at sepsis onset and over the observational period in the ICU in accordance with clinical judgment, as indicated. The bacteremia findings were only cultural.

Sometimes, infection foci could not be microbiologically verified, especially if the patients were pretreated with antibiotics on normal wards before they were admitted to the ICU.

## DISCUSSION

The present study addressed whether common infection sites among patients with sepsis are associated with the survival rate.

The primary endpoint, the mortality risk within 90 days of the onset of sepsis, was higher in patients with primary bloodstream infections compared with those with respiratory or intra-abdominal infections (58%, 35% and 32%, respectively; Fig. 1). Primary bacteremia remained a significant covariate for mortality in the multivariate analysis (Table 3).

According to the SOFA and APACHE II scores, the infection site was not associated with the acute-illness severity at the onset of sepsis (Table 1). We believe that the similarity in SOFA and APACHE II scores at sepsis onset among the three groups can be attributed to the phenotypic heterogeneity of sepsis. This heterogeneity is affected by several factors, including the causative organism of the infection and the amount of time elapsed since the infection began, as well as by individual patient characteristics, such as comorbidities and genetic makeup[28].

The most significant result of this study with respect to 90-day mortality risk was that the mortality rate (58%) was higher among patients with primary bloodstream infections; this result is in agreement with the results of several previous investigations that found similar mortality rates in patients with nosocomial bloodstream infections; e.g., Garrouste-Orgeas et al. found that patients with nosocomial BSI had a mortality rate of 61.5%[14 15]. Our study also goes beyond previous investigations by evaluating a longer-term end point (90 days); this end point was investigated because sepsis patients continue to face an increased risk of mortality, even after ICU and hospital discharge[32].

Severe morbidity, quantified by the SOFA mean score in patients with primary bloodstream infections, resulted in an increased 28-day mortality rate compared with the patients with pulmonary and intra-abdominal infections (50%, 32% and 17%, respectively; Table 2).

1  
2  
3 The strengths of our study include that it is the first to investigate organ-specific  
4 manifestations associated with common sepsis infection sites (respiratory, intra-abdominal  
5 and bloodstream) by quantifying SOFA scores and evaluating the requirements for organ  
6 support in the ICU (Table 2). The more pronounced types of respiratory failure, which are  
7 quantified by the SOFA-respiratory score and the need for mechanical ventilation (Table 2),  
8 among patients with pulmonary infections are plausible because these patients frequently  
9 present compromised pulmonary function. Patients with primary bacteremia are also at a high  
10 risk of respiratory failure due to systemic inflammatory response syndrome, release of pro-  
11 inflammatory cytokines (such as tumor necrosis factor (TNF), IL-1 and IL-6,[33]) and  
12 recruitment of neutrophils to the lungs, which induces the release of toxic mediators, such as  
13 reactive oxygen species and proteases, thus contributing to lung damage and respiratory  
14 failure[34].

15  
16 We believe that the difference in the SOFA-CNS score between the genotypes (with higher  
17 scores in the respiratory and the bloodstream groups) occurred because patients in these  
18 groups required much more mechanical ventilation, causing them to be treated more  
19 frequently with sedating medication, which impacts the CNS and thus affects the SOFA-CNS  
20 score.

21  
22 The observed distinct renal failure among bloodstream infection patients indicated by the  
23 SOFA-renal score, which was accompanied by frequent renal replacement therapy (Table 2),  
24 was in accordance with former observations indicating that bloodstream infections are  
25 associated with a higher incidence of renal failure[35]. The frequent utilization of renal  
26 replacement therapy suggests persistent organ dysfunction, which is a well-known contributor  
27 to sepsis-related mortality and may explain the higher mortality among bloodstream infection  
28 patients observed in our study (Table 2, Figure 1)[36].

29  
30 The SOFA-hepatic score was higher among patients with intra-abdominal and primary  
31 bloodstream infections compared with patients with pulmonary infections (Table 2). This

1  
2  
3 result can be attributed to the fact that Kupffer cells release several cytokines able to induce  
4 hepatocellular dysfunction in response to endotoxemia in patients with bloodstream  
5 infections[37].  
6  
7

8  
9  
10 There are some limitations to this study, along with potential confounding. One limitation to  
11 this study is the possibility of selection bias; for example, the patients in this study may have  
12 had a higher mortality rate in general than septic patients in other ICUs (e.g., in secondary  
13 medical care centers) because patients admitted to our surgical ICUs frequently had more  
14 severe coexisting diseases than did patients in other ICUs (non-tertiary care center ICUs). A  
15 second potential limitation to this study is measurement bias. For example, many clinical  
16 parameters (e.g., blood pressure, heart rate, and respiratory frequency) were registered  
17 automatically in the electronic patient record system, and we cannot guarantee that all  
18 registered clinical parameters were always correct because of potential measurement errors.  
19  
20 However, we did check all clinical records for plausibility before conducting our statistical  
21 analysis. Finally, one uncontrolled confounder that was not adjusted for is appropriate  
22 antibiotic therapy; although patients with clinical signs of infection were routinely promptly  
23 given antibiotic therapy, data regarding the exact times at which patients received antibiotic  
24 doses after sepsis onset are unavailable.  
25  
26  
27  
28  
29  
30  
31  
32  
33  
34  
35  
36  
37  
38  
39

40 To the best of our knowledge, this investigation is the first to evaluate 90-day survival rates  
41 with respect to common sepsis infection sites (respiratory, intra-abdominal and primary  
42 bloodstream). This study revealed a significantly higher mortality rate among patients with  
43 primary bloodstream infections (58%) compared with patients with respiratory and intra-  
44 abdominal infections, although all patients were treated according to current guidelines for the  
45 treatment of sepsis (Surviving Sepsis Campaign)[6]. Because of this dramatically higher  
46 mortality rate among patients with primary bloodstream sepsis, we believe that future sepsis  
47 trials should focus on this vulnerable group of high-risk patients. More appropriate  
48 interventions and further improvements in prevention and care are urgently needed.  
49  
50  
51  
52  
53  
54  
55  
56  
57  
58  
59  
60

1  
2  
3 **Acknowledgments** The authors thank the staff of the ICUs of the Department of  
4 Anesthesiology and the Department of General and Visceral Surgery, all of whom were  
5 involved in patient care. The authors also thank Benjamin Liese, Simon Wilmers, Chang Ho  
6 Hong, Sebastian Gerber and Maximillian Steinau for their dedicated help with the data  
7 collection for this study. This study was supported by the German Research Foundation  
8 (DFG) and the Open Access Publication Funds of Göttingen University.  
9  
10  
11  
12  
13  
14  
15  
16  
17

18 **Contributors** All authors contributed to the study design, data acquisition (clinical and  
19 experimental), or the analysis and interpretation of data. Specifically, YK collected clinical  
20 data and participated in the statistical analysis and interpretation of the data. AP, JE, MG and  
21 MB contributed to the study design, supervised patient enrollment and clinical data  
22 monitoring and interpreted data. TB contributed to the study design and conception and  
23 performed and approved the statistical analyses. AM and JH designed the study, supervised  
24 the sample and data collection, interpreted the data and drafted the manuscript. All authors  
25 were involved either in writing or revising the manuscript. All authors have approved the final  
26 version of the manuscript.  
27  
28  
29  
30  
31  
32  
33  
34  
35  
36  
37

38 **Data sharing:** No additional data available.

39  
40 **Funding:** None.

41  
42 **Competing interests:** None.  
43  
44  
45  
46

47 **Ethics approval:** This study was approved by the University of Goettingen ethics committee  
48 in Goettingen, Germany (1/15/12).  
49  
50  
51  
52  
53  
54  
55  
56  
57  
58  
59  
60

## REFERENCES

1. Vincent JL, Rello J, Marshall J, et al. International study of the prevalence and outcomes of infection in intensive care units. *JAMA :A: the journal of the American Medical Association* 2009;**302**(21):2323-9 doi: 10.1001/jama.2009.1754[published Online First: Epub Date]].
2. Vincent JL, Sakr Y, Sprung CL, et al. Sepsis in European intensive care units: results of the SOAP study. *Critical care medicine* 2006;**34**(2):344-53
3. O'Brien JM, Jr., Ali NA, Aberegg SK, Abraham E. Sepsis. *The American journal of medicine* 2007;**120**(12):1012-22 doi: 10.1016/j.amjmed.2007.01.035[published Online First: Epub Date]].
4. Angus DC, Linde-Zwirble WT, Lidicker J, Clermont G, Carcillo J, Pinsky MR. Epidemiology of severe sepsis in the United States: analysis of incidence, outcome, and associated costs of care. *Critical care medicine* 2001;**29**(7):1303-10
5. Rivers E, Nguyen B, Havstad S, et al. Early goal-directed therapy in the treatment of severe sepsis and septic shock. *The New England journal of medicine* 2001;**345**(19):1368-77 doi: 10.1056/NEJMoa010307[published Online First: Epub Date]].
6. Dellinger RP, Levy MM, Rhodes A, et al. Surviving sepsis campaign: international guidelines for management of severe sepsis and septic shock: 2012. *Critical care medicine* 2013;**41**(2):580-637 doi: 10.1097/CCM.0b013e31827e83af[published Online First: Epub Date]].
7. Alberti C, Brun-Buisson C, Burchardi H, et al. Epidemiology of sepsis and infection in ICU patients from an international multicentre cohort study. *Intensive care medicine* 2002;**28**(2):108-21 doi: 10.1007/s00134-001-1143-z[published Online First: Epub Date]].
8. Hospital-acquired pneumonia in adults: diagnosis, assessment of severity, initial antimicrobial therapy, and preventive strategies. A consensus statement, American Thoracic Society, November 1995. *American journal of respiratory and critical care medicine* 1996;**153**(5):1711-25 doi: 10.1164/ajrccm.153.5.8630626[published Online First: Epub Date]].
9. Craven DE, Kunches LM, Kilinsky V, Lichtenberg DA, Make BJ, McCabe WR. Risk factors for pneumonia and fatality in patients receiving continuous mechanical ventilation. *The American review of respiratory disease* 1986;**133**(5):792-6
10. Niederman MS. Guidelines for the management of respiratory infection: why do we need them, how should they be developed, and can they be useful? *Current opinion in pulmonary medicine* 1996;**2**(3):161-5
11. Calandra T, Cohen J, International Sepsis Forum Definition of Infection in the ICUCC. The international sepsis forum consensus conference on definitions of infection in the intensive care unit. *Critical care medicine* 2005;**33**(7):1538-48
12. Evans HL, Raymond DP, Pelletier SJ, Crabtree TD, Pruett TL, Sawyer RG. Diagnosis of intra-abdominal infection in the critically ill patient. *Current opinion in critical care* 2001;**7**(2):117-21
13. Marshall JC, Innes M. Intensive care unit management of intra-abdominal infection. *Critical care medicine* 2003;**31**(8):2228-37 doi: 10.1097/01.ccm.0000087326.59341.51[published Online First: Epub Date]].
14. Timsit JF, Laupland KB. Update on bloodstream infections in ICUs. *Current opinion in critical care* 2012;**18**(5):479-86 doi: 10.1097/MCC.0b013e328356cefe[published Online First: Epub Date]].
15. Garrouste-Orgeas M, Timsit JF, Tafflet M, et al. Excess risk of death from intensive care unit-acquired nosocomial bloodstream infections: a reappraisal. *Clinical infectious diseases :s: an official publication of the Infectious Diseases Society of America* 2006;**42**(8):1118-26 doi: 10.1086/500318[published Online First: Epub Date]].
16. Pittet D, Tarara D, Wenzel RP. Nosocomial bloodstream infection in critically ill patients. Excess length of stay, extra costs, and attributable mortality. *JAMA :A: the journal of the American Medical Association* 1994;**271**(20):1598-601



17. Renaud B, Brun-Buisson C, Group IC-BS. Outcomes of primary and catheter-related bacteremia. A cohort and case-control study in critically ill patients. *American journal of respiratory and critical care medicine* 2001;**163**(7):1584-90 doi: 10.1164/ajrccm.163.7.9912080[published Online First: Epub Date]].
18. Klevens RM, Edwards JR, Richards CL, Jr., et al. Estimating health care-associated infections and deaths in U.S. hospitals, 2002. *Public health reports (Washington, D.C. :. : 1974)* 2007;**122**(2):160-6
19. Digiovine B, Chenoweth C, Watts C, Higgins M. The attributable mortality and costs of primary nosocomial bloodstream infections in the intensive care unit. *American journal of respiratory and critical care medicine* 1999;**160**(3):976-81 doi: 10.1164/ajrccm.160.3.9808145[published Online First: Epub Date]].
20. Rello J, Ochagavia A, Sabanes E, et al. Evaluation of outcome of intravenous catheter-related infections in critically ill patients. *American journal of respiratory and critical care medicine* 2000;**162**(3 Pt 1):1027-30 doi: 10.1164/ajrccm.162.3.9911093[published Online First: Epub Date]].
21. Perencevich EN, Stone PW, Wright SB, et al. Raising standards while watching the bottom line: making a business case for infection control. *Infection control and hospital epidemiology :y: the official journal of the Society of Hospital Epidemiologists of America* 2007;**28**(10):1121-33 doi: 10.1086/521852[published Online First: Epub Date]].
22. Lin MY, Hota B, Khan YM, et al. Quality of traditional surveillance for public reporting of nosocomial bloodstream infection rates. *JAMA :A: the journal of the American Medical Association* 2010;**304**(18):2035-41 doi: 10.1001/jama.2010.1637[published Online First: Epub Date]].
23. Cohen J, Cristofaro P, Carlet J, Opal S. New method of classifying infections in critically ill patients. *Critical care medicine* 2004;**32**(7):1510-26
24. Zahar JR, Timsit JF, Garrouste-Orgeas M, et al. Outcomes in severe sepsis and patients with septic shock: pathogen species and infection sites are not associated with mortality. *Critical care medicine* 2011;**39**(8):1886-95 doi: 10.1097/CCM.0b013e31821b827c[published Online First: Epub Date]].
25. Bone RC, Balk RA, Cerra FB, et al. Definitions for sepsis and organ failure and guidelines for the use of innovative therapies in sepsis. The ACCP/SCCM Consensus Conference Committee. American College of Chest Physicians/Society of Critical Care Medicine. 1992. *Chest* 2009;**136**(5 Suppl):e28
26. Levy MM, Fink MP, Marshall JC, et al. 2001 SCCM/ESICM/ACCP/ATS/SIS International Sepsis Definitions Conference. *Critical care medicine* 2003;**31**(4):1250-6 doi: 10.1097/01.ccm.0000050454.01978.3b[published Online First: Epub Date]].
27. American Thoracic S, Infectious Diseases Society of A. Guidelines for the management of adults with hospital-acquired, ventilator-associated, and healthcare-associated pneumonia. *American journal of respiratory and critical care medicine* 2005;**171**(4):388-416 doi: 10.1164/rccm.200405-644ST[published Online First: Epub Date]].
28. Mansur A, von Gruben L, Popov AF, et al. The regulatory toll-like receptor 4 genetic polymorphism rs11536889 is associated with renal, coagulation and hepatic organ failure in sepsis patients. *Journal of translational medicine* 2014;**12**:177 doi: 10.1186/1479-5876-12-177[published Online First: Epub Date]].
29. Mansur A, Hinz J, Hillebrecht B, et al. Ninety-day survival rate of patients with sepsis relates to programmed cell death 1 genetic polymorphism rs11568821. *Journal of investigative medicine :e: the official publication of the American Federation for Clinical Research* 2014;**62**(3):638-43 doi: 10.231/jim.0000000000000059[published Online First: Epub Date]].
30. Vincent JL, de Mendonca A, Cantraine F, et al. Use of the SOFA score to assess the incidence of organ dysfunction/failure in intensive care units: results of a multicenter, prospective study. Working group on "sepsis-related problems" of the European Society of Intensive Care Medicine. *Critical care medicine* 1998;**26**(11):1793-800



- 1
- 2
- 3 31. Knaus WA, Draper EA, Wagner DP, Zimmerman JE. APACHE II: a severity of disease classification
- 4 system. *Critical care medicine* 1985;**13**(10):818-29
- 5 32. Khamis R. Execution of sepsis trials needs an overhaul, experts say. *Nature medicine*
- 6 2012;**18**(7):998-9 doi: 10.1038/nm0712-998b[published Online First: Epub Date] |.
- 7 33. Martin TR. Lung cytokines and ARDS: Roger S. Mitchell Lecture. *Chest* 1999;**116**(1 Suppl):2S-8S
- 8 34. Windsor AC, Mullen PG, Fowler AA, Sugerman HJ. Role of the neutrophil in adult respiratory
- 9 distress syndrome. *The British journal of surgery* 1993;**80**(1):10-7
- 10 35. Shmueli H, Pitlik S, Drucker M, Samra Z, Konisberger H, Leibovici L. Prediction of mortality in
- 11 patients with bacteremia: the importance of pre-existing renal insufficiency. *Renal failure*
- 12 2000;**22**(1):99-108
- 13 36. Vincent JL, Nelson DR, Williams MD. Is worsening multiple organ failure the cause of death in
- 14 patients with severe sepsis? *Critical care medicine* 2011;**39**(5):1050-5 doi:
- 15 10.1097/CCM.0b013e31820eda29[published Online First: Epub Date] |.
- 16 37. Koo DJ, Chaudry IH, Wang P. Kupffer cells are responsible for producing inflammatory cytokines
- 17 and hepatocellular dysfunction during early sepsis. *The Journal of surgical research*
- 18 1999;**83**(2):151-7 doi: 10.1006/jsre.1999.5584[published Online First: Epub Date] |.
- 19
- 20
- 21
- 22
- 23
- 24
- 25
- 26
- 27
- 28
- 29
- 30
- 31
- 32
- 33
- 34
- 35
- 36
- 37
- 38
- 39
- 40
- 41
- 42
- 43
- 44
- 45
- 46
- 47
- 48
- 49
- 50
- 51
- 52
- 53
- 54
- 55
- 56
- 57
- 58
- 59
- 60

peer review only

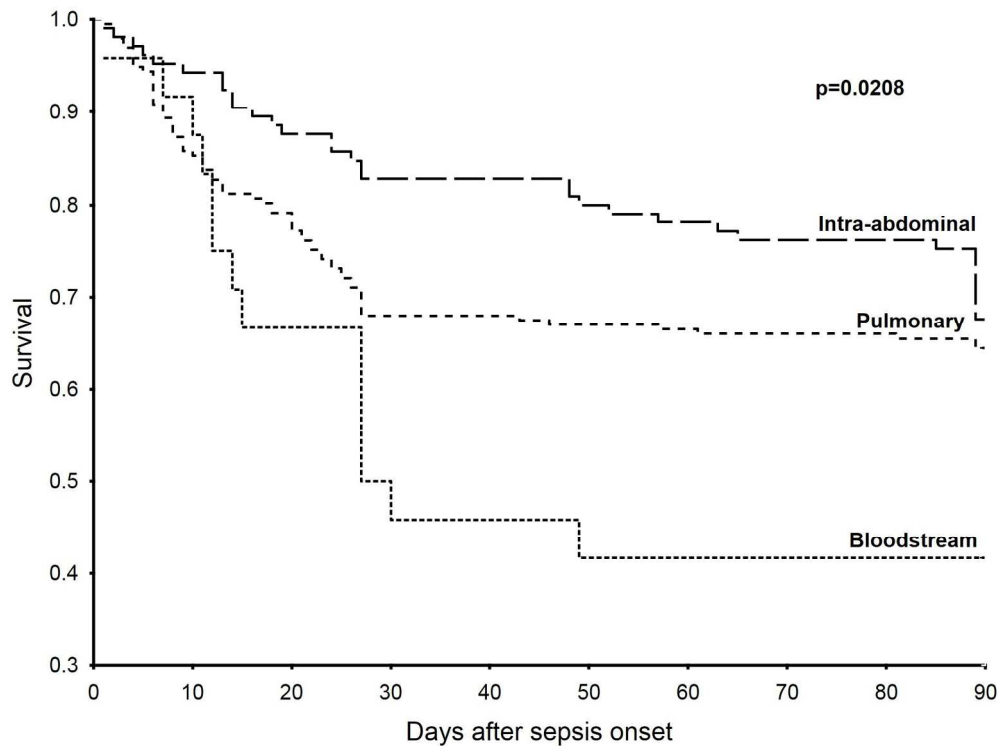

Figure 1. Kaplan-Meier survival analysis

The Kaplan-Meier curve shows the survival curves until day 90 for the three infection site groups. The mortality risk among the patients under study was higher among the patients with bloodstream infections compared with those in the pulmonary and intra-abdominal infection groups ( $p=0.0208$ , log-rank test).  
165x123mm (300 x 300 DPI)

1  
2  
3 **Primary bacteremia is associated with a higher mortality risk compared with**  
4 **pulmonary and intra-abdominal infections in patients with sepsis: a**  
5 **prospective observational cohort study**  
6  
7  
8  
9

10 Ashham Mansur<sup>1\*</sup>, Yvonne Klee<sup>1</sup>, Aron Frederik Popov<sup>2</sup>, Joachim Erlenwein<sup>1</sup>,  
11 Michael Ghadimi<sup>3</sup>, Tim Beissbarth<sup>4</sup>, Martin Bauer<sup>1</sup>, José Hinz<sup>1</sup>  
12

13  
14  
15  
16  
17 <sup>1</sup>Department of Anesthesiology, University Medical Center, Georg August  
18 University, D-37075 Goettingen, Germany  
19

20  
21 <sup>2</sup>Department of Cardiothoracic Transplantation & Mechanical Support, Royal  
22 Brompton and Harefield Hospital, Harefield, Hill End Road, UB9 6JH London,  
23 United Kingdom  
24

25 <sup>3</sup>Department of General and Visceral Surgery, University Medical Center, Georg  
26 August University, D-37075 Goettingen, Germany  
27

28 <sup>4</sup>Department of Medical Statistics, University Medical Center, Georg August  
29 University, D-37075 Goettingen, Germany  
30  
31  
32  
33  
34

35 **\*Corresponding author:**  
36

37 Dr. Ashham Mansur  
38

39 Medical consultant  
40

41 Dept. of Anesthesiology  
42

43 Georg-August-University, University Medical Center  
44

45 Robert-Koch-Str. 40, 37099 Goettingen, Germany  
46

47 Phone: +49 551 39 7819  
48

49 Fax: +49 551 39 13886  
50

51 E-mail: [ashham.mansur@med.uni-goettingen.de](mailto:ashham.mansur@med.uni-goettingen.de)  
52  
53  
54

55 **Keywords:** Apache II; Pulmonary infection; intra-abdominal infection; intensive  
56 care unit; organ failure marker; SOFA scores  
57

58 **Word count** 3058  
59  
60

**ABSTRACT**

**Objective:** To investigate whether common infection foci (pulmonary, intra-abdominal and primary bacteremia) are associated with variations in mortality risk in sepsis patients.

**Design:** Prospective, observational cohort study.

**Setting:** Three surgical intensive care units (ICU) at a university medical center.

**Participants:** A total of 327 adult Caucasian patients with sepsis originating from pulmonary, intra-abdominal and primary bacteremia participated in this study.

**Primary and secondary outcome measures:** The patients were followed for 90 days, and mortality risk was recorded as the primary outcome variable. To monitor organ failure, sepsis-related organ failure assessment (SOFA) scores were evaluated at the onset of sepsis and throughout the observational period as secondary outcome variables.

**Results:** A total of 327 critically ill patients with sepsis were enrolled in this study. Kaplan-Meier survival analysis showed that the 90-day mortality risk was significantly higher among patients with primary bacteremia than among those with pulmonary and intra-abdominal foci (58%, 35% and 32%, respectively;  $p=0.0208$ ). To exclude the effects of several baseline variables, we performed multivariate Cox regression analysis. Primary bacteremia remained a significant covariate for mortality in the multivariate analysis (hazard ratio, 2.10; 95% CI, 1.14-3.86;  $p=0.0166$ ). During their stay in the ICU, the patients with primary bacteremia presented significantly higher SOFA scores than those of the patients with pulmonary and intra-abdominal infection foci ( $8.5\pm 4.7$ ,  $7.3\pm 3.4$  and  $5.8\pm 3.5$ , respectively). Patients with primary bacteremia presented higher SOFA-renal score compared with the patients with other infection foci ( $1.6\pm 1.4$ ,  $0.8\pm 1.1$  and  $0.7\pm 1.0$ , respectively); the primary bacteremia patients required significantly more renal replacement therapy than the patients in the other groups (29%, 11% and 12%, respectively).

1  
2  
3 **Conclusions:** These results indicate that sepsis patients with primary bacteremia present a  
4 higher mortality risk compared with patients with sepsis of pulmonary or intra-abdominal  
5 origins. These results should be assessed in sepsis patients in larger, independent cohorts.  
6  
7  
8  
9  
10  
11  
12  
13  
14  
15  
16  
17  
18  
19  
20  
21  
22  
23  
24  
25  
26  
27  
28  
29  
30  
31  
32  
33  
34  
35  
36  
37  
38  
39  
40  
41  
42  
43  
44  
45  
46  
47  
48  
49  
50  
51  
52  
53  
54  
55  
56  
57  
58  
59  
60

For peer review only

### Strengths and limitations of this study

- This is the first study to evaluate mortality risk among sepsis patients with primary bloodstream infections compared with those with respiratory or intra-abdominal infections over an observational period of 90 days.
- The strengths of our study include that it is the first to investigate organ-specific manifestations associated with common sepsis infection sites (respiratory, intra-abdominal and bloodstream) by quantifying SOFA scores and evaluating the requirements for organ support in the ICU.
- One potentially uncontrolled confounder that was not adjusted for is appropriate antibiotic therapy.

## INTRODUCTION

Sepsis is defined as a systemic inflammatory response that occurs during severe infection[1-3]. Sepsis affects more than 750,000 patients in the United States each year and remains one of the leading causes of death worldwide[4]. Although the incidence of this major health care problem has been increasing, the implementation of early goal-directed therapy in patients with severe sepsis and septic shock has in part successfully reduced mortality[5]. Guidelines for disease control have been written by the Surviving Sepsis Campaign (SSC), a joint collaboration between the Society of Critical Care Medicine and the European Society of Intensive Care Medicine committed to reducing mortality from severe sepsis and septic shock worldwide[6]. These guidelines contain clear recommendations for improving disease outcomes (e.g., guidelines for resuscitation and recommendations pertaining to infections, including for the use of diagnostics, hemodynamic support and adjunctive therapy and for supportive therapy for severe sepsis)[6].

Respiratory, intra-abdominal, urinary and primary bloodstream infections make up 80% of all infection sites[7]. According to epidemiological data, the lung is the most common site of infection, followed by the abdomen and the blood[2].

Pneumonia, hospital-acquired pneumonia (HAP), ventilator-associated pneumonia (VAP) and subsequent sepsis remain important causes of morbidity and mortality in critically ill patients despite advances in antimicrobial therapy, better supportive care modalities, and a wide range of preventive measures[8-10].

Intra-abdominal infections are a common cause of sepsis. These infections comprise a markedly heterogeneous group of infectious processes that share an anatomical site of origin between the diaphragm and the pelvis[11]. Their clinical course is dictated by a number of infection-related factors, including the microbiology of the infection, the anatomical location,

1  
2  
3 the degree of localization, and the presence of correctable anatomical derangements involving  
4  
5 intra-abdominal viscera[12 13].  
6  
7

8 Bloodstream infections (BSIs) are a major cause of death due to nosocomial events in  
9  
10 intensive care units (ICUs)[14]. Immunosuppression and invasive health care procedures act  
11  
12 together to create a high risk of nosocomial BSIs in critically ill patients[15]. The outcomes of  
13  
14 BSIs have been the focus of many case-control and cohort studies[15-17]. BSIs lead to poor  
15  
16 patient outcomes[16 18], prolonged patient stays in the ICU and in the hospital[16 19 20], and  
17  
18 substantial extra medical costs[21 22].  
19  
20  
21

22 Whether the characteristics of the infection, infection site and pathogenic organism  
23  
24 independently affect the outcome in patients with sepsis remains a subject of debate. Whereas  
25  
26 previous studies have shown an independent, significant contribution of the infection site and  
27  
28 the pathogenic organism to the survival of sepsis patients[23], recent investigations have not  
29  
30 found any significant impact of the infection site on mortality among patients with sepsis[24].  
31  
32  
33

34 This study aimed to explore whether common origins of sepsis infections, in particular  
35  
36 respiratory, intra-abdominal and bloodstream infection sites, are associated with changes in  
37  
38 the 90-day survival rate among patients with sepsis in a representative university medical  
39  
40 center, where patients are treated according to the most recent sepsis guidelines.  
41  
42  
43  
44  
45  
46  
47  
48  
49  
50  
51  
52  
53  
54  
55  
56  
57  
58  
59  
60



## MATERIALS AND METHODS

### Patients

Adult Caucasian patients admitted to ICUs at the University Medical Center-Goettingen (UMG) between April 2012 and May 2013 were screened daily according to the American College of Chest Physicians/Society of Critical Care Medicine (ACCP/SCCM) criteria for sepsis, severe sepsis, or septic shock[25 26]. This study was approved by the University of Goettingen ethics committee in Goettingen, Germany (1/15/12) and conformed to the ethical principles of the Declaration of Helsinki (Seoul, 2008). For each patient, written, informed consent was obtained from either the patient or his or her legal representative. Patients were enrolled if they presented sepsis of a respiratory, intra-abdominal or primary bloodstream origin. **Because interracial genetic differences may affect the clinical course of infectious diseases, we have exclusively recruited Caucasians, who form the majority of patients admitted to our surgical ICUs, into this clinical investigation.** Caucasian origin was assessed by questioning the patients, their next of kin or their legal representatives.

### Definitions

In this study, patients with sepsis of respiratory origin had hospital-acquired pneumonia (HAP) or ventilator-associated pneumonia (VAP). HAP is the most frequent infection in surgical intensive care units and is defined as a pulmonary infection that was not incubating at the time of admission and that occurred at least 48 h after hospital admission[27]. Ventilator-associated pneumonia (VAP) is defined as either a pulmonary infection arising more than 48 h after tracheal intubation with no evidence of pneumonia at the time of intubation or the diagnosis of a new pulmonary infection if the initial ICU admission was due to pneumonia[27].

Typically, patients with intra-abdominal infections in the surgical ICU develop secondary peritonitis as a result of microbial infection of the peritoneal space following perforation,

1  
2  
3 abscess formation, ischemic necrosis, or a penetrating injury of the intra-abdominal  
4 contents[11].  
5

6  
7 Primary BSI comprises BSI of unknown origin in patients without an identifiable focus of  
8 infection, and intravascular catheter-related BSI (catheter, implantable cardioverter-  
9 defibrillator or pacemaker related); according to The International Sepsis Forum Consensus  
10 Conference on Definitions of Infection in the Intensive Care Unit[11].  
11  
12  
13  
14

### 15 16 **Exclusion criteria**

17  
18 As described previously[28 29], the patient exclusion criteria were the following: (1) age less  
19 than 18 years; (2) being pregnant or nursing an infant; (3) immunosuppressive therapy (e.g.,  
20 cyclosporine or azathioprine) or cancer-related chemotherapy; (4) documented or suspected  
21 acute myocardial infarction within the previous 6 weeks; (5) a history of New York Heart  
22 Association functional class IV chronic heart failure; (6) human immunodeficiency virus  
23 infection; (7) a do not resuscitate or do not treat order or the patient and/or his or her legal  
24 representative not being committed to aggressive management; (8) not being expected to  
25 survive the 28-day observation period or not being likely to be placed on life support because  
26 of an uncorrectable medical condition, including a poorly controlled neoplasm or end-stage  
27 lung disease; (9) a chronic vegetative state or a similar long-term neurological condition; (10)  
28 current participation in any interventional study (of a drug or device); (11) inability to be fully  
29 evaluated during the study period; and (12) being a study-site employee or a family member  
30 of a study-site employee involved in conducting this study.  
31  
32  
33  
34  
35  
36  
37  
38  
39  
40  
41  
42  
43  
44  
45  
46  
47  
48  
49  
50  
51  
52  
53  
54  
55  
56  
57  
58  
59  
60

### Data collection

Patients were followed up for 90 days, and mortality risk was recorded as the primary outcome variable. Sequential Organ Failure Assessment (SOFA)[30] and Acute Physiology and Chronic Health Evaluation (APACHE) II[31] scores were evaluated at the onset of sepsis. Organ function was reassessed over 28 days in the ICU to monitor morbidity as previously described[28]. Organ failure, organ support requirements and the length of ICU stay were recorded as secondary outcome variables. All relevant clinical data were extracted from the electronic patient record system (IntelliSpace Critical Care and Anesthesia (ICCA); Philips Healthcare, Andover, Massachusetts, USA); all medical records, including microbiology reports, can be found in this system. We sought to determine whether patients suffered from preexisting conditions, for example, comorbidities, by examining physicians' notes, administering an anamnestic questionnaire to the patients or their legal representatives and consulting each patient's family doctor.

### Statistical analyses

Statistical analyses were performed using Statistica software (version 10; StatSoft, Tulsa, Oklahoma, USA). Based on contingency tables, significance was calculated using two-sided Fisher's exact or chi-square tests, as appropriate. Two continuous variables were compared using the Mann-Whitney test. Time-to-event data were compared using the log-rank test from the Statistica package for Kaplan-Meier survival analysis. For variables identified as significant in univariate survival analyses (respiratory infections, intra-abdominal infections and primary bacteremia), potential confounders (age, gender and BMI) and covariates that varied at baseline (diabetes mellitus (IDDM), history of cancer and "No history of surgery"), we performed multivariate Cox regression analysis to examine survival times. A value of  $p < 0.05$  was considered statistically significant.

## RESULTS

### Study population

A total of 327 adult Caucasian patients with sepsis were enrolled in this study. At enrollment, 61% of the patients had a pulmonary infection; 32% suffered from an intra-abdominal infection; and 7% presented with a primary bloodstream infection (Table 1). Patients' ages ranged from 19 to 91 years (median, 65 years). At baseline, patients' SOFA and APACHE II scores, which measure disease severity, were  $9.3\pm 4.0$  and  $21.5\pm 7.3$ , respectively (Table 1). Comorbidities included hypertension, myocardial infarction history, chronic obstructive pulmonary disease (COPD), renal dysfunction, non-insulin-dependent diabetes mellitus, insulin-dependent diabetes mellitus, chronic liver diseases, history of cancer, and a history of stroke (Table 1). Many patients were discharged before 90 days. We were able to follow all of these patients. If the patient or legal representative could not be reached by telephone or mail, we confidentially contacted the local registry office and inquired whether the patient was still alive (still registered).

**Table 1. Patient baseline characteristics with regard to the infection site**

|                                  | All<br>n=327   | Pulmonary<br>n=198 | Intra-abdominal<br>n=105 | Bloodstream<br>n=24 | p-value |
|----------------------------------|----------------|--------------------|--------------------------|---------------------|---------|
| Age, mean $\pm$ SD               | 62 $\pm$ 15    | 61 $\pm$ 15        | 65 $\pm$ 13              | 60 $\pm$ 16         | 0.2426  |
| Male, %                          | 67%            | 70                 | 61                       | 62                  | 0.2614  |
| Body mass index, mean $\pm$ SD   | 27 $\pm$ 6     | 27 $\pm$ 7         | 27 $\pm$ 5               | 29 $\pm$ 5          | 0.0885  |
| SOFA score, mean $\pm$ SD        | 9.3 $\pm$ 4.0  | 9.4 $\pm$ 3.6      | 8.9 $\pm$ 4.7            | 10.5 $\pm$ 5.1      | 0.3099  |
| APACHE II score, mean $\pm$ SD   | 21.5 $\pm$ 7.3 | 21.8 $\pm$ 6.8     | 20.6 $\pm$ 8.1           | 22.8 $\pm$ 7.6      | 0.3538  |
| Organ support, %                 |                |                    |                          |                     |         |
| Mechanical ventilation           | 85             | 90                 | 74                       | 87                  | 0.0008  |
| Use of vasopressor               | 64             | 62                 | 65                       | 70                  | 0.6778  |
| Renal replacement therapy        | 8              | 7                  | 9                        | 20                  | 0.0781  |
| Comorbidities, %                 |                |                    |                          |                     |         |
| Hypertension                     | 57             | 55                 | 59                       | 66                  | 0.5395  |
| History of myocardial infarction | 8              | 9                  | 7                        | 8                   | 0.9087  |
| COPD                             | 17             | 17                 | 17                       | 16                  | 0.9880  |
| Renal dysfunction                | 11             | 10                 | 9                        | 25                  | 0.0857  |
| Diabetes mellitus (NIDDM)        | 9              | 10                 | 8                        | 8                   | 0.8928  |
| Diabetes mellitus (IDDM)         | 11             | 8                  | 11                       | 33                  | 0.0015  |

|                            |    |    |    |    |         |
|----------------------------|----|----|----|----|---------|
| Chronic liver diseases     | 5  | 3  | 8  | 8  | 0.1538  |
| History of cancer          | 18 | 15 | 30 | 0  | 0.0003  |
| History of stroke          | 6  | 8  | 4  | 0  | 0.2192  |
| Recent surgical history, % |    |    |    |    |         |
| Elective surgery           | 30 | 27 | 37 | 25 | 0.1730  |
| Emergency surgery          | 48 | 45 | 56 | 42 | 0.1401  |
| No history of surgery      | 21 | 28 | 7  | 33 | <0.0001 |

The data are presented as the means±SDs or percentages. NIDDM, noninsulin-dependent diabetes mellitus; IDDM, insulin-dependent diabetes mellitus.

For peer review only

### Disease severity at the onset of sepsis

No differences in age, gender, or body mass index were found among the three groups of study subjects. Moreover, no differences were found in the SOFA and APACHE II scores with respect to the infection sites at the onset of sepsis. The patients in the group with intra-abdominal infections required significantly less mechanical ventilation compared with the other groups with pulmonary and bloodstream infections (74%, 90% and 87%, respectively). The patients with bloodstream infections suffered significantly more from insulin-dependent diabetes mellitus compared with patients with pulmonary or intra-abdominal infections (33%, 8%, 11%, respectively). In contrast, none of the patients with bloodstream infections had a history of cancer, unlike the patients with pulmonary and intra-abdominal infections (15% and 30%, respectively; Table 1).

### Mortality analysis

Kaplan-Meier survival analysis showed that the 90-day mortality risk was significantly higher among patients with primary bacteremia than among those with pulmonary and intra-abdominal foci (58%, 35% and 32%, respectively; Figure 1). Analysis of the 28-day mortality data similarly revealed that the patients with bloodstream infections had a significantly increased risk of death compared with the patients with pulmonary and intra-abdominal infections (50%, 32% and 17%, respectively; Table 2). Moreover, 90-day mortality analysis suggested a higher incidence of death among the patients with bloodstream infections, although this finding was not significant ( $p=0.0544$ ; Table 2).

**Table 2. Disease severity with regard to infection site**

|                              | All<br>n=327 | Pulmonary<br>n=198 | Intra-abdominal<br>n=105 | Bloodstream<br>n=24 | p-value |
|------------------------------|--------------|--------------------|--------------------------|---------------------|---------|
| SOFA                         | 6.9±3.6      | 7.3±3.4            | 5.8±3.5                  | 8.5±4.7             | 0.0002  |
| SOFA Subscores               |              |                    |                          |                     |         |
| SOFA-Respiratory             | 1.9±0.7      | 2.2±0.6            | 1.5±0.7                  | 1.9±0.9             | <0.0001 |
| SOFA-Cardiovascular          | 1.5±0.9      | 1.5±0.9            | 1.3±0.9                  | 1.7±1.2             | 0.4567  |
| SOFA-Central nervous system  | 1.8±1.1      | 2.1±1.0            | 1.4±1.0                  | 2.0±1.2             | <0.0001 |
| SOFA-Renal                   | 0.8±1.1      | 0.8±1.1            | 0.7±1.0                  | 1.6±1.4             | 0.0028  |
| SOFA-Coagulation             | 0.3±0.5      | 0.3±0.6            | 0.2±0.5                  | 0.6±0.8             | 0.4662  |
| SOFA-Hepatic                 | 0.4±0.7      | 0.3±0.6            | 0.5±0.8                  | 0.5±0.6             | 0.0030  |
| Organ support*, (%):         |              |                    |                          |                     |         |
| Mechanical ventilation       |              | 85                 | 62                       | 76                  | <0.0001 |
| Use of vasopressor           |              | 54                 | 45                       | 49                  | 0.8355  |
| Renal replacement therapy    |              | 11                 | 12                       | 29                  | 0.0069  |
| Length of stay in ICU (days) | 18±15        | 17±14              | 20±16                    | 16±13               | 0.5061  |
| Mortality analysis, (%):     |              |                    |                          |                     |         |
| Death by day 28              | 94 (28)      | 64 (32)            | 18 (17)                  | 12 (50)             | 0.0012  |
| Death by day 90              | 118 (36)     | 70 (35)            | 34 (32)                  | 14 (58)             | 0.0544  |

The data are presented as means±SDs or percentages.

\*Based on the total number of observations during the follow-up period.

### Multivariate analysis



To exclude the effects of several baseline variables on survival among the three groups being investigated, we performed multivariate Cox regression analysis. Bloodstream infection remained a significant covariate for mortality in the multivariate analysis (hazard ratio, 2.10; 95% CI, 1.14-3.86;  $p=0.0166$ ; Table 3). This finding indicates that, despite baseline differences in some variables (i.e., IDDM, Cancer and “No history of surgery”), the presence of a primary bloodstream infection remains a prognostic variable with a significant effect on the outcome (90-day survival; Table 3).

**Table 3. Cox regression analysis**

| Infection site   | Variable                  | Hazard ratio | 95% CI    | p-value |
|------------------|---------------------------|--------------|-----------|---------|
| Pulmonary:       |                           |              |           |         |
|                  | Age                       | 1.02         | 1.00-1.03 | 0.0009  |
|                  | Gender                    | 1.19         | 0.80-1.76 | 0.3803  |
|                  | BMI                       | 1.00         | 0.97-1.03 | 0.7058  |
|                  | Diabetes mellitus (IDDM)  | 1.29         | 0.75-2.19 | 0.3450  |
|                  | History of cancer         | 1.26         | 0.81-1.95 | 0.2921  |
|                  | No history of surgery     | 1.37         | 0.87-2.14 | 0.1634  |
|                  | Pulmonary infection       | 1.05         | 0.72-1.55 | 0.7675  |
| Intra-abdominal: |                           |              |           |         |
|                  | Age                       | 1.02         | 1.00-1.03 | 0.0007  |
|                  | Gender                    | 1.17         | 0.79-1.73 | 0.4302  |
|                  | BMI                       | 1.00         | 0.97-1.03 | 0.6497  |
|                  | Diabetes mellitus (IDDM)  | 1.28         | 0.75-2.16 | 0.3534  |
|                  | History of cancer         | 1.33         | 0.85-2.06 | 0.2036  |
|                  | No history of surgery     | 1.25         | 0.80-1.97 | 0.3209  |
|                  | Intra-abdominal infection | 0.71         | 0.46-1.08 | 0.1142  |
| Bloodstream:     |                           |              |           |         |
|                  | Age                       | 1.02         | 1.01-1.03 | 0.0007  |
|                  | Gender                    | 1.18         | 0.80-1.75 | 0.3956  |
|                  | BMI                       | 1.00         | 0.97-1.03 | 0.7930  |
|                  | Diabetes mellitus (IDDM)  | 1.07         | 0.61-1.88 | 0.7877  |
|                  | History of cancer         | 1.36         | 0.87-2.12 | 0.1719  |
|                  | No history of surgery     | 1.30         | 0.84-2.02 | 0.2290  |
|                  | Bloodstream infection     | 2.10         | 1.14-3.86 | 0.0166  |

### Disease severity

During the observational period, patients with bloodstream infections presented significantly higher mean SOFA scores compared with patients in the other groups ( $8.5\pm 4.7$ ,  $7.3\pm 3.4$  and  $5.8\pm 3.5$ , respectively; Table 2). Four of the six organ-specific SOFA scores (respiratory,

1  
2  
3 central nervous system (CNS), renal and hepatic) varied significantly among the study groups.  
4  
5 The patients with pulmonary infections presented higher SOFA-respiratory scores than did  
6  
7 patients with intra-abdominal and bloodstream infections ( $2.2\pm 0.6$ ,  $1.5\pm 0.7$  and  $1.9\pm 0.9$ ,  
8  
9 respectively; Table 2). **The patients with pulmonary and bloodstream infections required more**  
10  
11 **mechanical ventilation than patients with intra-abdominal infections (85%, 76% and 62%,**  
12  
13 **respectively; Table 2). Patients with mechanical ventilation usually received lung-protective**  
14  
15 **ventilation (Tidal volume of 6–8 ml/kg predicted body weight) and were treated according to**  
16  
17 **structured weaning protocols of the ICUs. Weaning protocols included daily trials of**  
18  
19 **spontaneous breathing, gradual reduction in pressure support and use of non-invasive**  
20  
21 **mechanical ventilation for extubated patients.** The patients with pulmonary and bloodstream  
22  
23 infections presented higher SOFA-CNS scores than those of the patients with intra-abdominal  
24  
25 infections ( $2.1\pm 1.0$ ,  $2.0\pm 1.2$  and  $1.4\pm 1.0$ , respectively; Table 2). Analysis of the SOFA-renal  
26  
27 scores indicated that the patients with bloodstream infections presented higher SOFA-renal  
28  
29 scores over the study period in the ICU compared with the patients with pulmonary and intra-  
30  
31 abdominal infections ( $1.6\pm 1.4$ ,  $0.8\pm 1.1$  and  $0.7\pm 1.0$ , respectively; Table 2). These patients  
32  
33 also required significantly more renal replacement therapy (29%, 11% and 12%, respectively;  
34  
35 Table 2). The SOFA-hepatic score was significantly higher in the patients with intra-  
36  
37 abdominal and bloodstream infections compared with the patients with pulmonary infections  
38  
39 ( $0.5\pm 0.8$ ,  $0.5\pm 0.6$  and  $0.3\pm 0.6$ , respectively; Table 2). Additional results regarding disease  
40  
41 severity were added to the supplemental data (see online supplementary data; Table 1).  
42  
43  
44  
45

46  
47 In addition, the gram-negative infection rate was significantly higher among the patients with  
48  
49 pulmonary infections (75%) compared with those whose sepsis had intra-abdominal and  
50  
51 bloodstream infection origins (57% and 54%, respectively; Table 4). Additional results  
52  
53 regarding microbiological findings and anti-infective therapy were added to the supplemental  
54  
55 data (see online supplementary data, Table 2 and Table 3; respectively).  
56  
57

#### 58 **Table 4. Infection types over the observational period**

| Infection site         | Pulmonary | Intra-abdominal | Bloodstream | p-value |
|------------------------|-----------|-----------------|-------------|---------|
| Infection type         |           |                 |             |         |
| Gram-negative bacteria | 75%       | 57%             | 54%         | 0.0026  |
| Gram-positive bacteria | 78%       | 84%             | 79%         | 0.5142  |
| Fungus                 | 52%       | 76%             | 42%         | <0.0001 |
| Virus                  | 0.08%     | 0.06%           | 0.13%       | 0.4941  |

Furthermore, septic patients with intra-abdominal infections presented a higher incidence of fungal infections (76%) compared with the patients with pulmonary and bloodstream infections (52% and 42%, respectively; Table 4). In this study, blood cultures and cultures of samples from other sites, such as urine, cerebrospinal fluid, surgical wounds, respiratory secretions, or other body fluids that may be the source of infection, were taken at sepsis onset and over the observational period in the ICU in accordance with clinical judgment, as indicated. The bacteremia findings were only cultural.

Sometimes, infection foci could not be microbiologically verified, especially if the patients were pretreated with antibiotics on normal wards before they were admitted to the ICU.

## DISCUSSION

The present study addressed whether common infection sites among patients with sepsis are associated with the survival rate.

The primary endpoint, the mortality risk within 90 days of the onset of sepsis, was higher in patients with primary bloodstream infections compared with those with respiratory or intra-abdominal infections (58%, 35% and 32%, respectively; Fig. 1). Primary bacteremia remained a significant covariate for mortality in the multivariate analysis (Table 3).

According to the SOFA and APACHE II scores, the infection site was not associated with the acute-illness severity at the onset of sepsis (Table 1). We believe that the similarity in SOFA and APACHE II scores at sepsis onset among the three groups can be attributed to the phenotypic heterogeneity of sepsis. This heterogeneity is affected by several factors, including the causative organism of the infection and the amount of time elapsed since the infection began, as well as by individual patient characteristics, such as comorbidities and genetic makeup[28].

The most significant result of this study with respect to 90-day mortality risk was that the mortality rate (58%) was higher among patients with primary bloodstream infections; this result is in agreement with the results of several previous investigations that found similar mortality rates in patients with nosocomial bloodstream infections; e.g., Garrouste-Orgeas et al. found that patients with nosocomial BSI had a mortality rate of 61.5%[14 15]. Our study also goes beyond previous investigations by evaluating a longer-term end point (90 days); this end point was investigated because sepsis patients continue to face an increased risk of mortality, even after ICU and hospital discharge[32].

Severe morbidity, quantified by the SOFA mean score in patients with primary bloodstream infections, resulted in an increased 28-day mortality rate compared with the patients with pulmonary and intra-abdominal infections (50%, 32% and 17%, respectively; Table 2).

1  
2  
3 The strengths of our study include that it is the first to investigate organ-specific  
4 manifestations associated with common sepsis infection sites (respiratory, intra-abdominal  
5 and bloodstream) by quantifying SOFA scores and evaluating the requirements for organ  
6 support in the ICU (Table 2). The more pronounced types of respiratory failure, which are  
7 quantified by the SOFA-respiratory score and the need for mechanical ventilation (Table 2),  
8 among patients with pulmonary infections are plausible because these patients frequently  
9 present compromised pulmonary function. Patients with primary bacteremia are also at a high  
10 risk of respiratory failure due to systemic inflammatory response syndrome, release of pro-  
11 inflammatory cytokines (such as tumor necrosis factor (TNF), IL-1 and IL-6,[33]) and  
12 recruitment of neutrophils to the lungs, which induces the release of toxic mediators, such as  
13 reactive oxygen species and proteases, thus contributing to lung damage and respiratory  
14 failure[34].

15  
16 We believe that the difference in the SOFA-CNS score between the genotypes (with higher  
17 scores in the respiratory and the bloodstream groups) occurred because patients in these  
18 groups required much more mechanical ventilation, causing them to be treated more  
19 frequently with sedating medication, which impacts the CNS and thus affects the SOFA-CNS  
20 score.

21  
22 The observed distinct renal failure among bloodstream infection patients indicated by the  
23 SOFA-renal score, which was accompanied by frequent renal replacement therapy (Table 2),  
24 was in accordance with former observations indicating that bloodstream infections are  
25 associated with a higher incidence of renal failure[35]. The frequent utilization of renal  
26 replacement therapy suggests persistent organ dysfunction, which is a well-known contributor  
27 to sepsis-related mortality and may explain the higher mortality among bloodstream infection  
28 patients observed in our study (Table 2, Figure 1)[36].

29  
30 The SOFA-hepatic score was higher among patients with intra-abdominal and primary  
31 bloodstream infections compared with patients with pulmonary infections (Table 2). This

1  
2  
3 result can be attributed to the fact that Kupffer cells release several cytokines able to induce  
4 hepatocellular dysfunction in response to endotoxemia in patients with bloodstream  
5 infections[37].  
6  
7

8  
9  
10 There are some limitations to this study, along with potential confounding. One limitation to  
11 this study is the possibility of selection bias; for example, the patients in this study may have  
12 had a higher mortality rate in general than septic patients in other ICUs (e.g., in secondary  
13 medical care centers) because patients admitted to our surgical ICUs frequently had more  
14 severe coexisting diseases than did patients in other ICUs (non-tertiary care center ICUs). A  
15 second potential limitation to this study is measurement bias. For example, many clinical  
16 parameters (e.g., blood pressure, heart rate, and respiratory frequency) were registered  
17 automatically in the electronic patient record system, and we cannot guarantee that all  
18 registered clinical parameters were always correct because of potential measurement errors.  
19  
20 However, we did check all clinical records for plausibility before conducting our statistical  
21 analysis. Finally, one uncontrolled confounder that was not adjusted for is appropriate  
22 antibiotic therapy; although patients with clinical signs of infection were routinely promptly  
23 given antibiotic therapy, data regarding the exact times at which patients received antibiotic  
24 doses after sepsis onset are unavailable.  
25  
26  
27  
28  
29  
30  
31  
32  
33  
34  
35  
36  
37  
38  
39

40 To the best of our knowledge, this investigation is the first to evaluate 90-day survival rates  
41 with respect to common sepsis infection sites (respiratory, intra-abdominal and primary  
42 bloodstream). This study revealed a significantly higher mortality rate among patients with  
43 primary bloodstream infections (58%) compared with patients with respiratory and intra-  
44 abdominal infections, although all patients were treated according to current guidelines for the  
45 treatment of sepsis (Surviving Sepsis Campaign)[6]. Because of this dramatically higher  
46 mortality rate among patients with primary bloodstream sepsis, we believe that future sepsis  
47 trials should focus on this vulnerable group of high-risk patients. More appropriate  
48 interventions and further improvements in prevention and care are urgently needed.  
49  
50  
51  
52  
53  
54  
55  
56  
57  
58  
59  
60

1  
2  
3 **Acknowledgments** The authors thank the staff of the ICUs of the Department of  
4 Anesthesiology and the Department of General and Visceral Surgery, all of whom were  
5 involved in patient care. The authors also thank Benjamin Liese, Simon Wilmers, Chang Ho  
6 Hong, Sebastian Gerber and Maximillian Steinau for their dedicated help with the data  
7 collection for this study. This study was supported by the German Research Foundation  
8 (DFG) and the Open Access Publication Funds of Göttingen University.  
9  
10  
11  
12  
13  
14  
15  
16  
17

18 **Contributors** All authors contributed to the study design, data acquisition (clinical and  
19 experimental), or the analysis and interpretation of data. Specifically, YK collected clinical  
20 data and participated in the statistical analysis and interpretation of the data. AP, JE, MG and  
21 MB contributed to the study design, supervised patient enrollment and clinical data  
22 monitoring and interpreted data. TB contributed to the study design and conception and  
23 performed and approved the statistical analyses. AM and JH designed the study, supervised  
24 the sample and data collection, interpreted the data and drafted the manuscript. All authors  
25 were involved either in writing or revising the manuscript. All authors have approved the final  
26 version of the manuscript.  
27  
28  
29  
30  
31  
32  
33  
34  
35  
36  
37  
38  
39

40 **Funding:** None.

41 **Competing interests:** None.  
42  
43  
44  
45  
46

47 **Ethics approval:** This study was approved by the University of Goettingen ethics committee  
48 in Goettingen, Germany (1/15/12).  
49  
50  
51  
52  
53  
54  
55  
56  
57  
58  
59  
60



## REFERENCES

1. Vincent JL, Rello J, Marshall J, et al. International study of the prevalence and outcomes of infection in intensive care units. *JAMA :A: the journal of the American Medical Association* 2009;**302**(21):2323-9 doi: 10.1001/jama.2009.1754[published Online First: Epub Date]].
2. Vincent JL, Sakr Y, Sprung CL, et al. Sepsis in European intensive care units: results of the SOAP study. *Critical care medicine* 2006;**34**(2):344-53
3. O'Brien JM, Jr., Ali NA, Aberegg SK, Abraham E. Sepsis. *The American journal of medicine* 2007;**120**(12):1012-22 doi: 10.1016/j.amjmed.2007.01.035[published Online First: Epub Date]].
4. Angus DC, Linde-Zwirble WT, Lidicker J, Clermont G, Carcillo J, Pinsky MR. Epidemiology of severe sepsis in the United States: analysis of incidence, outcome, and associated costs of care. *Critical care medicine* 2001;**29**(7):1303-10
5. Rivers E, Nguyen B, Havstad S, et al. Early goal-directed therapy in the treatment of severe sepsis and septic shock. *The New England journal of medicine* 2001;**345**(19):1368-77 doi: 10.1056/NEJMoa010307[published Online First: Epub Date]].
6. Dellinger RP, Levy MM, Rhodes A, et al. Surviving sepsis campaign: international guidelines for management of severe sepsis and septic shock: 2012. *Critical care medicine* 2013;**41**(2):580-637 doi: 10.1097/CCM.0b013e31827e83af[published Online First: Epub Date]].
7. Alberti C, Brun-Buisson C, Burchardi H, et al. Epidemiology of sepsis and infection in ICU patients from an international multicentre cohort study. *Intensive care medicine* 2002;**28**(2):108-21 doi: 10.1007/s00134-001-1143-z[published Online First: Epub Date]].
8. Hospital-acquired pneumonia in adults: diagnosis, assessment of severity, initial antimicrobial therapy, and preventive strategies. A consensus statement, American Thoracic Society, November 1995. *American journal of respiratory and critical care medicine* 1996;**153**(5):1711-25 doi: 10.1164/ajrccm.153.5.8630626[published Online First: Epub Date]].
9. Craven DE, Kunches LM, Kilinsky V, Lichtenberg DA, Make BJ, McCabe WR. Risk factors for pneumonia and fatality in patients receiving continuous mechanical ventilation. *The American review of respiratory disease* 1986;**133**(5):792-6
10. Niederman MS. Guidelines for the management of respiratory infection: why do we need them, how should they be developed, and can they be useful? *Current opinion in pulmonary medicine* 1996;**2**(3):161-5
11. Calandra T, Cohen J, International Sepsis Forum Definition of Infection in the ICUCC. The international sepsis forum consensus conference on definitions of infection in the intensive care unit. *Critical care medicine* 2005;**33**(7):1538-48
12. Evans HL, Raymond DP, Pelletier SJ, Crabtree TD, Pruett TL, Sawyer RG. Diagnosis of intra-abdominal infection in the critically ill patient. *Current opinion in critical care* 2001;**7**(2):117-21
13. Marshall JC, Innes M. Intensive care unit management of intra-abdominal infection. *Critical care medicine* 2003;**31**(8):2228-37 doi: 10.1097/01.ccm.0000087326.59341.51[published Online First: Epub Date]].
14. Timsit JF, Laupland KB. Update on bloodstream infections in ICUs. *Current opinion in critical care* 2012;**18**(5):479-86 doi: 10.1097/MCC.0b013e328356cefe[published Online First: Epub Date]].
15. Garrouste-Orgeas M, Timsit JF, Tafflet M, et al. Excess risk of death from intensive care unit-acquired nosocomial bloodstream infections: a reappraisal. *Clinical infectious diseases :s: an official publication of the Infectious Diseases Society of America* 2006;**42**(8):1118-26 doi: 10.1086/500318[published Online First: Epub Date]].
16. Pittet D, Tarara D, Wenzel RP. Nosocomial bloodstream infection in critically ill patients. Excess length of stay, extra costs, and attributable mortality. *JAMA :A: the journal of the American Medical Association* 1994;**271**(20):1598-601



17. Renaud B, Brun-Buisson C, Group IC-BS. Outcomes of primary and catheter-related bacteremia. A cohort and case-control study in critically ill patients. *American journal of respiratory and critical care medicine* 2001;**163**(7):1584-90 doi: 10.1164/ajrccm.163.7.9912080[published Online First: Epub Date]].
18. Klevens RM, Edwards JR, Richards CL, Jr., et al. Estimating health care-associated infections and deaths in U.S. hospitals, 2002. *Public health reports (Washington, D.C. :. : 1974)* 2007;**122**(2):160-6
19. Digiovine B, Chenoweth C, Watts C, Higgins M. The attributable mortality and costs of primary nosocomial bloodstream infections in the intensive care unit. *American journal of respiratory and critical care medicine* 1999;**160**(3):976-81 doi: 10.1164/ajrccm.160.3.9808145[published Online First: Epub Date]].
20. Rello J, Ochagavia A, Sabanes E, et al. Evaluation of outcome of intravenous catheter-related infections in critically ill patients. *American journal of respiratory and critical care medicine* 2000;**162**(3 Pt 1):1027-30 doi: 10.1164/ajrccm.162.3.9911093[published Online First: Epub Date]].
21. Perencevich EN, Stone PW, Wright SB, et al. Raising standards while watching the bottom line: making a business case for infection control. *Infection control and hospital epidemiology :y: the official journal of the Society of Hospital Epidemiologists of America* 2007;**28**(10):1121-33 doi: 10.1086/521852[published Online First: Epub Date]].
22. Lin MY, Hota B, Khan YM, et al. Quality of traditional surveillance for public reporting of nosocomial bloodstream infection rates. *JAMA :A: the journal of the American Medical Association* 2010;**304**(18):2035-41 doi: 10.1001/jama.2010.1637[published Online First: Epub Date]].
23. Cohen J, Cristofaro P, Carlet J, Opal S. New method of classifying infections in critically ill patients. *Critical care medicine* 2004;**32**(7):1510-26
24. Zahar JR, Timsit JF, Garrouste-Orgeas M, et al. Outcomes in severe sepsis and patients with septic shock: pathogen species and infection sites are not associated with mortality. *Critical care medicine* 2011;**39**(8):1886-95 doi: 10.1097/CCM.0b013e31821b827c[published Online First: Epub Date]].
25. Bone RC, Balk RA, Cerra FB, et al. Definitions for sepsis and organ failure and guidelines for the use of innovative therapies in sepsis. The ACCP/SCCM Consensus Conference Committee. American College of Chest Physicians/Society of Critical Care Medicine. 1992. *Chest* 2009;**136**(5 Suppl):e28
26. Levy MM, Fink MP, Marshall JC, et al. 2001 SCCM/ESICM/ACCP/ATS/SIS International Sepsis Definitions Conference. *Critical care medicine* 2003;**31**(4):1250-6 doi: 10.1097/01.ccm.0000050454.01978.3b[published Online First: Epub Date]].
27. American Thoracic S, Infectious Diseases Society of A. Guidelines for the management of adults with hospital-acquired, ventilator-associated, and healthcare-associated pneumonia. *American journal of respiratory and critical care medicine* 2005;**171**(4):388-416 doi: 10.1164/rccm.200405-644ST[published Online First: Epub Date]].
28. Mansur A, von Gruben L, Popov AF, et al. The regulatory toll-like receptor 4 genetic polymorphism rs11536889 is associated with renal, coagulation and hepatic organ failure in sepsis patients. *Journal of translational medicine* 2014;**12**:177 doi: 10.1186/1479-5876-12-177[published Online First: Epub Date]].
29. Mansur A, Hinz J, Hillebrecht B, et al. Ninety-day survival rate of patients with sepsis relates to programmed cell death 1 genetic polymorphism rs11568821. *Journal of investigative medicine :e: the official publication of the American Federation for Clinical Research* 2014;**62**(3):638-43 doi: 10.231/jim.0000000000000059[published Online First: Epub Date]].
30. Vincent JL, de Mendonca A, Cantraine F, et al. Use of the SOFA score to assess the incidence of organ dysfunction/failure in intensive care units: results of a multicenter, prospective study. Working group on "sepsis-related problems" of the European Society of Intensive Care Medicine. *Critical care medicine* 1998;**26**(11):1793-800

- 1
- 2
- 3 31. Knaus WA, Draper EA, Wagner DP, Zimmerman JE. APACHE II: a severity of disease classification
- 4 system. *Critical care medicine* 1985;**13**(10):818-29
- 5 32. Khamisi R. Execution of sepsis trials needs an overhaul, experts say. *Nature medicine*
- 6 2012;**18**(7):998-9 doi: 10.1038/nm0712-998b[published Online First: Epub Date] |.
- 7 33. Martin TR. Lung cytokines and ARDS: Roger S. Mitchell Lecture. *Chest* 1999;**116**(1 Suppl):2S-8S
- 8 34. Windsor AC, Mullen PG, Fowler AA, Sugerman HJ. Role of the neutrophil in adult respiratory
- 9 distress syndrome. *The British journal of surgery* 1993;**80**(1):10-7
- 10 35. Shmueli H, Pitlik S, Drucker M, Samra Z, Konisberger H, Leibovici L. Prediction of mortality in
- 11 patients with bacteremia: the importance of pre-existing renal insufficiency. *Renal failure*
- 12 2000;**22**(1):99-108
- 13 36. Vincent JL, Nelson DR, Williams MD. Is worsening multiple organ failure the cause of death in
- 14 patients with severe sepsis? *Critical care medicine* 2011;**39**(5):1050-5 doi:
- 15 10.1097/CCM.0b013e31820eda29[published Online First: Epub Date] |.
- 16 37. Koo DJ, Chaudry IH, Wang P. Kupffer cells are responsible for producing inflammatory cytokines
- 17 and hepatocellular dysfunction during early sepsis. *The Journal of surgical research*
- 18 1999;**83**(2):151-7 doi: 10.1006/jsre.1999.5584[published Online First: Epub Date] |.
- 19
- 20
- 21
- 22
- 23
- 24
- 25
- 26
- 27
- 28
- 29
- 30
- 31
- 32
- 33
- 34
- 35
- 36
- 37
- 38
- 39
- 40
- 41
- 42
- 43
- 44
- 45
- 46
- 47
- 48
- 49
- 50
- 51
- 52
- 53
- 54
- 55
- 56
- 57
- 58
- 59
- 60

peer review only

**Supplementary Data; Table 1: Vital parameters, laboratory parameters, kidney parameters and inflammation values**

|                                  | All<br>n=327   | Pulmonary<br>n=198 | Intra-abdominal<br>n=105 | Bloodstream<br>n=24 | P value |
|----------------------------------|----------------|--------------------|--------------------------|---------------------|---------|
| vital parameters, mean ± SD      |                |                    |                          |                     |         |
| Temperature (°C), max            | 37.9±0.5       | 38.0±0.5           | 37.7±0.4                 | 37.8±0.6            | 0.0032  |
| Temperature (°C), min            | 36.8±0.5       | 36.9±0.4           | 36.7±0.5                 | 36.6±0.6            | 0.0054  |
| Heart rate (bpm), max            | 103±12         | 103±12             | 103±11                   | 102±15              | 0.5067  |
| Heart rate (bpm), min            | 72±11          | 72±11              | 74±11                    | 73±12               | 0.4774  |
| MAP (mmHg), max                  | 100±11         | 101±12             | 99±10                    | 94±15               | 0.0781  |
| MAP (mmHg), min                  | 66±9           | 66±9               | 67±8                     | 62±9                | 0.0243  |
| Vasopressor (µg/kg/min) (n)      | 10±9<br>(247)  | 10±9<br>(147)      | 10±7<br>(83)             | 10±9<br>(17)        | 0.2268  |
| laboratory parameters, mean ± SD |                |                    |                          |                     |         |
| Lactate (mmol/l)                 | 1.7±1.1        | 1.6±1.0            | 1.7±1.1                  | 2.0±1.2             | 0.1278  |
| Thrombocytes (1000/µl)           | 295±148        | 281±133            | 329±168                  | 257±154             | 0.0344  |
| Quick (%) (n)                    | 83±16<br>(325) | 83±16<br>(196)     | 84±17<br>(105)           | 77±16<br>(24)       | 0.1528  |
| kidney values                    |                |                    |                          |                     |         |
| Urine output (ml/day)            | 3055±1406      | 2900±1281          | 3555±1443                | 2144±1535           | <0.0001 |
| Urine output (ml/kg/h)           | 1.6±0.8        | 1.5±0.8            | 1.8±0.8                  | 0.9±0.6             | <0.0001 |
| Creatinine (mg/dl)               | 1.3±0.9        | 1.3±0.9            | 1.2±1.0                  | 1.6±1.0             | 0.0148  |
| inflammatory values              |                |                    |                          |                     |         |
| Leukocytes (1000/µl)             | 13±5           | 12±4               | 15±5                     | 14±5                | 0.0001  |
| CRP (mg/l) (n)                   | 150±85 (175)   | 141±97 (70)        | 154±69 (90)              | 168±107 (15)        | 0.2159  |
| Procalcitonin (ng/dl) (n)        | 4.8±12.0 (280) | 3.3±9.7 (176)      | 7.4±15.6 (81)            | 7.1±11.3 (23)       | <0.0001 |

CRP=C-reactive protein; MAP=Mean arterial pressure; The data are presented as the mean±SD or percentages. Min and Max indicate the lowest/highest value that has been recorded daily within the observation period.

**Supplementary Data; Table 2. Recorded microbiological findings**

|                               | All<br>n=327 | Pulmonary<br>n=198 | Intra-abdominal<br>n=105 | Bloodstream<br>n=24 |
|-------------------------------|--------------|--------------------|--------------------------|---------------------|
| <b>Bacteria</b>               |              |                    |                          |                     |
| <b>Gram-negative, n (%)</b>   |              |                    |                          |                     |
| Acinetobacter genomospecies 3 | 2 (0.6)      | 2 (1.0)            | 0 (0.0)                  | 0 (0.0)             |
| Bacteroides fragilis          | 11 (3.4)     | 0 (0.0)            | 11 (10.5)                | 0 (0.0)             |
| Bacteroides ovaters           | 2 (0.6)      | 1 (0.5)            | 1 (1.0)                  | 0 (0.0)             |
| Bacteroides species           | 3 (0.9)      | 0 (0.0)            | 3 (2.9)                  | 0 (0.0)             |
| Bacteroides thetaiotaomicron  | 4 (1.2)      | 1 (0.5)            | 3 (2.9)                  | 0 (0.0)             |
| Bacteroides uniformis         | 4 (1.2)      | 0 (0.0)            | 4 (3.8)                  | 0 (0.0)             |
| Chlamydia pneumoniae IgA      | 6 (1.8)      | 6 (3.0)            | 0 (0.0)                  | 0 (0.0)             |
| Chlamydia pneumoniae IgG      | 2 (0.6)      | 1 (0.5)            | 0 (0.0)                  | 1 (4.2)             |
| Chlamydophila pneumoniae      | 2 (0.6)      | 2 (1.0)            | 0 (0.0)                  | 0 (0.0)             |
| Citobacter braakii            | 1 (0.3)      | 0 (0.0)            | 1 (1.0)                  | 0 (0.0)             |
| Citrobacter freundii          | 3 (0.9)      | 2 (1.0)            | 1 (1.0)                  | 0 (0.0)             |
| Citrobacter koseri            | 2 (0.6)      | 1 (0.5)            | 1 (1.0)                  | 0 (0.0)             |
| Enterobacter aerogenes        | 1 (0.3)      | 1 (0.5)            | 0 (0.0)                  | 0 (0.0)             |
| Enterobacter asburiae         | 2 (0.6)      | 1 (0.5)            | 1 (1.0)                  | 0 (0.0)             |
| Enterobacter cloacae          | 22 (6.7)     | 14 (7.0)           | 5 (4.8)                  | 3 (12.5)            |
| ESBL E.coli                   | 5 (1.5)      | 2 (1.0)            | 2 (1.9)                  | 1 (4.2)             |
| Escherichia coli              | 53 (16.2)    | 35 (17.7)          | 15 (14.3)                | 3 (12.5)            |
| Haemophilus influenza         | 12 (3.7)     | 12 (6.1)           | 0 (0.0)                  | 0 (0.0)             |
| Haemophilus parainfluenzae    | 3 (0.9)      | 2 (1.0)            | 1 (1.0)                  | 0 (0.0)             |
| Hafnia alvei                  | 2 (0.6)      | 2 (1.0)            | 0 (0.0)                  | 0 (0.0)             |
| Klebsiella oxytoca            | 8 (2.5)      | 8 (4.0)            | 0 (0.0)                  | 0 (0.0)             |
| Klebsiella pneumoniae         | 13 (4.0)     | 10 (5.1)           | 3 (2.9)                  | 0 (0.0)             |
| Morganella morganii           | 3 (0.9)      | 3 (1.5)            | 0 (0.0)                  | 0 (0.0)             |
| Pantoea agglomerans           | 1 (0.3)      | 1 (0.5)            | 0 (0.0)                  | 0 (0.0)             |
| Proteus mirabilis             | 9 (2.8)      | 8 (4.0)            | 1 (1.0)                  | 0 (0.0)             |
| Proteus species               | 1 (0.3)      | 1 (0.5)            | 0 (0.0)                  | 0 (0.0)             |
| Proteus vulgaris              | 1 (0.3)      | 0 (0.0)            | 1 (1.0)                  | 0 (0.0)             |
| Pseudomonas aeruginosa        | 26 (8.0)     | 20 (10.1)          | 5 (4.8)                  | 1 (4.2)             |
| Pseudomonas korrensis         | 1 (0.3)      | 0 (0.0)            | 0 (0.0)                  | 1 (4.2)             |
| Serratia marcescens           | 8 (2.5)      | 7 (3.5)            | 0 (0.0)                  | 1 (4.2)             |
| Serratia ureilytica           | 1 (0.3)      | 0 (0.0)            | 0 (0.0)                  | 1 (4.2)             |
| Stenotrophomonas maltophilia  | 5 (1.5)      | 3 (1.5)            | 1 (1.0)                  | 1 (4.2)             |
| <b>Gram-positive, n (%)</b>   |              |                    |                          |                     |
| Aerococcus urinae             | 1 (0.3)      | 1 (0.5)            | 0 (0.0)                  | 0 (0.0)             |
| Clostridium difficile         | 5 (1.5)      | 1 (0.5)            | 3 (2.9)                  | 1 (4.2)             |
| Clostridium innocuum          | 1 (0.3)      | 0 (0.0)            | 1 (1.0)                  | 0 (0.0)             |
| Clostridium perfringens       | 3 (0.9)      | 0 (0.0)            | 3 (2.9)                  | 0 (0.0)             |
| Enterococcus avium            | 1 (0.3)      | 0 (0.0)            | 1 (1.0)                  | 0 (0.0)             |
| Enterococcus casseliflavus    | 1 (0.3)      | 0 (0.0)            | 1 (1.0)                  | 0 (0.0)             |
| Enterococcus faecalis         | 33 (10.1)    | 10 (5.1)           | 23 (21.9)                | 0 (0.0)             |
| Enterococcus faecium          | 35 (10.7)    | 4 (2.0)            | 27 (25.7)                | 4 (16.7)            |

|    |                                  |            |           |           |          |
|----|----------------------------------|------------|-----------|-----------|----------|
| 1  |                                  |            |           |           |          |
| 2  |                                  |            |           |           |          |
| 3  |                                  |            |           |           |          |
| 4  | Enterococcus mundtii             | 1 (0.3)    | 0 (0.0)   | 0 (0.0)   | 1 (4.2)  |
| 5  | Enterococcus species             | 29 (8.9)   | 25 (12.6) | 3 (2.9)   | 1 (4.2)  |
| 6  | Coagulase negative Staphylococci | 12 (3.7)   | 8 (4.0)   | 3 (2.9)   | 1 (4.2)  |
| 7  | Lactobacillus paracasei          | 1 (0.3)    | 0 (0.0)   | 1 (1.0)   | 0 (0.0)  |
| 8  | MRSA                             | 6 (1.8)    | 5 (2.5)   | 0 (0.0)   | 1 (4.2)  |
| 9  | Peptostreptococcus species       | 2 (0.6)    | 1 (0.5)   | 1 (1.0)   | 0 (0.0)  |
| 10 | Rothia mucilaginosa              | 1 (0.3)    | 1 (0.5)   | 0 (0.0)   | 0 (0.0)  |
| 11 | Staphylococcus aureus            | 52 (15.9)  | 47 (23.7) | 1 (1.0)   | 4 (16.7) |
| 12 | Staphylococcus capitis           | 7 (2.1)    | 5 (2.5)   | 1 (1.0)   | 1 (4.2)  |
| 13 | Staphylococcus epidermidis       | 36 (11.0)  | 24 (12.1) | 9 (8.6)   | 3 (12.5) |
| 14 | Staphylococcus haemolyticus      | 2 (0.6)    | 2 (1.0)   | 0 (0.0)   | 0 (0.0)  |
| 15 | Staphylococcus hominis           | 4 (1.2)    | 3 (1.5)   | 1 (1.0)   | 0 (0.0)  |
| 16 | Staphylococcus wameri            | 1 (0.3)    | 1 (0.5)   | 0 (0.0)   | 0 (0.0)  |
| 17 | Streptococcus agalactiae         | 4 (1.2)    | 3 (1.5)   | 1 (1.0)   | 0 (0.0)  |
| 18 | Streptococcus anginosus          | 3 (0.9)    | 0 (0.0)   | 2 (1.9)   | 1 (4.2)  |
| 19 | Streptococcus constellatus       | 5 (1.5)    | 3 (1.5)   | 2 (1.9)   | 0 (0.0)  |
| 20 | Streptococcus pneumonia          | 4 (1.2)    | 4 (2.0)   | 0 (0.0)   | 0 (0.0)  |
| 21 | Streptococcus viridans           | 2 (0.6)    | 1 (0.5)   | 0 (0.0)   | 1 (4.2)  |
| 22 |                                  |            |           |           |          |
| 23 | Fungi, n (%)                     |            |           |           |          |
| 24 | Aspergillus flavus               | 1 (0.3)    | 1 (0.5)   | 0 (0.0)   | 0 (0.0)  |
| 25 | Aspergillus fumigatus            | 3 (0.9)    | 1 (0.5)   | 1 (1.0)   | 1 (4.2)  |
| 26 | Candida albicans                 | 110 (33.6) | 67 (33.8) | 38 (36.2) | 5 (20.8) |
| 27 | Candida dubliniensis             | 3 (0.9)    | 2 (1.0)   | 1 (1.0)   | 0 (0.0)  |
| 28 | Candida glabrata                 | 25 (7.7)   | 16 (8.0)  | 6 (5.7)   | 3 (12.5) |
| 29 | Candida guilliermondii           | 1 (0.3)    | 0 (0.0)   | 1 (1.0)   | 0 (0.0)  |
| 30 | Candida IgG                      | 3 (0.9)    | 1 (0.5)   | 2 (1.9)   | 0 (0.0)  |
| 31 | Candida krusei                   | 5 (1.5)    | 2 (1.0)   | 2 (1.9)   | 1 (4.2)  |
| 32 | Candida lusitanae                | 1 (0.3)    | 1 (0.5)   | 0 (0.0)   | 0 (0.0)  |
| 33 | Candida palmiophila              | 1 (0.3)    | 0 (0.0)   | 1 (1.0)   | 0 (0.0)  |
| 34 | Candida parapsilosis             | 4 (1.2)    | 3 (1.5)   | 1 (1.0)   | 0 (0.0)  |
| 35 | Candida tropicalis               | 14 (4.3)   | 6 (3.0)   | 8 (7.6)   | 0 (0.0)  |
| 36 |                                  |            |           |           |          |
| 37 | Viruses, n (%)                   |            |           |           |          |
| 38 | Adenovirus-Ag-IFT                | 1 (0.3)    | 0 (0.0)   | 1 (1.0)   | 0 (0.0)  |
| 39 | CMV                              | 5 (1.5)    | 3 (1.5)   | 1 (1.0)   | 1 (4.2)  |
| 40 | H1N1 (2009 RNA)                  | 1 (0.3)    | 1 (0.5)   | 0 (0.0)   | 0 (0.0)  |
| 41 | H1N1 DNA                         | 4 (1.2)    | 4 (2.0)   | 0 (0.0)   | 0 (0.0)  |
| 42 | HSV                              | 4 (1.2)    | 1 (0.5)   | 2 (1.9)   | 1 (4.2)  |
| 43 | RS-Virusantigen IFT              | 2 (0.6)    | 2 (1.0)   | 0 (0.0)   | 0 (0.0)  |
| 44 | Varizella zoster virus           | 1 (0.3)    | 1 (0.5)   | 0 (0.0)   | 0 (0.0)  |

CMV: Cytomegalovirus; MRSA: Methicillin-resistant Staphylococcus aureus; RS-Virus: Respiratory Syncytial Virus.

**Supplementary Data; Table 3. Anti-infective agents**

|                               | All<br>n=327 | Pulmonary<br>n=198 | Intra-abdominal<br>n=105 | Bloodstream<br>n=24 |
|-------------------------------|--------------|--------------------|--------------------------|---------------------|
| <b>Antibiotics, n (%)</b>     |              |                    |                          |                     |
| Penicillins                   | 168 (51)     | 133 (67)           | 21 (20)                  | 14 (58)             |
| Aminopenicillins              | 43 (13)      | 30 (15)            | 11 (10)                  | 2 (8)               |
| 2. generation cephalosporines | 49 (15)      | 42 (21)            | 4 (3)                    | 3 (12)              |
| 3. generation cephalosporines | 87 (26)      | 60 (30)            | 23 (21)                  | 4 (16)              |
| Carbapenems                   | 215 (65)     | 107 (54)           | 91 (86)                  | 17 (70)             |
| Macrolides                    | 84 (25)      | 70 (35)            | 6 (5)                    | 8 (33)              |
| Aminoglycosides               | 15 (4)       | 7 (3)              | 6 (5)                    | 2 (8)               |
| Fluorchinolones               | 50 (15)      | 29 (14)            | 17 (16)                  | 4 (16)              |
| Imidazoles                    | 38 (11)      | 14 (7)             | 22 (20)                  | 2 (8)               |
| Glycopeptides                 | 125 (38)     | 44 (22)            | 63 (60)                  | 18 (75)             |
| Lipopeptides                  | 2 (0.6)      | 1 (0.5)            | 1 (0.9)                  | 0 (0)               |
| Lincosamides                  | 11 (3)       | 8 (4)              | 1 (0.9)                  | 2 (8)               |
| Oxazolidinones                | 106 (32)     | 60 (30)            | 39 (37)                  | 7 (29)              |
| Glycylcyclines                | 4 (1)        | 0 (0)              | 3 (2)                    | 1 (4)               |
| Rifampicin                    | 4 (1)        | 3 (1)              | 0 (0)                    | 1 (4)               |
| Sulfamethoxazol/Trimethoprim  | 12 (3)       | 7 (3)              | 4 (3)                    | 1 (4)               |
| <b>Antifungals, n (%)</b>     |              |                    |                          |                     |
| Echinocandin                  | 60 (18)      | 25 (12)            | 25 (23)                  | 10 (41)             |
| Triazole derivatives          | 91 (27)      | 22 (11)            | 62 (59)                  | 7 (29)              |
| Polyene                       | 5 (1)        | 5 (2)              | 0 (0)                    | 0 (0)               |
| <b>Antivirals, n (%)</b>      |              |                    |                          |                     |
| Aciclovir                     | 5 (1)        | 3 (1)              | 2 (1)                    | 0 (0)               |
| Ganciclovir/Valganciclovir    | 2 (0.6)      | 1 (0.5)            | 0 (0)                    | 1 (4)               |
| Oseltamivir                   | 4 (1.2)      | 4 (2)              | 0 (0)                    | 0 (0)               |

STROBE 2007 (v4) Statement—Checklist of items that should be included in reports of *cohort studies*

| Section/Topic                | Item # | Recommendation                                                                                                                                                                       | Reported on page # |
|------------------------------|--------|--------------------------------------------------------------------------------------------------------------------------------------------------------------------------------------|--------------------|
| Title and abstract           | 1      | (a) Indicate the study's design with a commonly used term in the title or the abstract                                                                                               | 1                  |
|                              |        | (b) Provide in the abstract an informative and balanced summary of what was done and what was found                                                                                  | 2                  |
| <b>Introduction</b>          |        |                                                                                                                                                                                      |                    |
| Background/rationale         | 2      | Explain the scientific background and rationale for the investigation being reported                                                                                                 | 5                  |
| Objectives                   | 3      | State specific objectives, including any prespecified hypotheses                                                                                                                     | 5                  |
| <b>Methods</b>               |        |                                                                                                                                                                                      |                    |
| Study design                 | 4      | Present key elements of study design early in the paper                                                                                                                              | 6                  |
| Setting                      | 5      | Describe the setting, locations, and relevant dates, including periods of recruitment, exposure, follow-up, and data collection                                                      | 7-8                |
| Participants                 | 6      | (a) Give the eligibility criteria, and the sources and methods of selection of participants. Describe methods of follow-up                                                           | 7-9                |
|                              |        | (b) For matched studies, give matching criteria and number of exposed and unexposed                                                                                                  | 7                  |
| Variables                    | 7      | Clearly define all outcomes, exposures, predictors, potential confounders, and effect modifiers. Give diagnostic criteria, if applicable                                             | 8                  |
| Data sources/<br>measurement | 8*     | For each variable of interest, give sources of data and details of methods of assessment (measurement). Describe comparability of assessment methods if there is more than one group | 8                  |
| Bias                         | 9      | Describe any efforts to address potential sources of bias                                                                                                                            | 8                  |
| Study size                   | 10     | Explain how the study size was arrived at                                                                                                                                            | 8                  |
| Quantitative variables       | 11     | Explain how quantitative variables were handled in the analyses. If applicable, describe which groupings were chosen and why                                                         | 8-9                |
| Statistical methods          | 12     | (a) Describe all statistical methods, including those used to control for confounding                                                                                                | 9                  |
|                              |        | (b) Describe any methods used to examine subgroups and interactions                                                                                                                  | 9                  |
|                              |        | (c) Explain how missing data were addressed                                                                                                                                          | 9                  |
|                              |        | (d) If applicable, explain how loss to follow-up was addressed                                                                                                                       |                    |
|                              |        | (e) Describe any sensitivity analyses                                                                                                                                                | 9                  |
| <b>Results</b>               |        |                                                                                                                                                                                      |                    |

|                          |     |                                                                                                                                                                                                              |       |
|--------------------------|-----|--------------------------------------------------------------------------------------------------------------------------------------------------------------------------------------------------------------|-------|
| Participants             | 13* | (a) Report numbers of individuals at each stage of study—eg numbers potentially eligible, examined for eligibility, confirmed eligible, included in the study, completing follow-up, and analysed            | 10    |
|                          |     | (b) Give reasons for non-participation at each stage                                                                                                                                                         | 7     |
|                          |     | (c) Consider use of a flow diagram                                                                                                                                                                           | 7     |
| Descriptive data         | 14* | (a) Give characteristics of study participants (eg demographic, clinical, social) and information on exposures and potential confounders                                                                     | 10    |
|                          |     | (b) Indicate number of participants with missing data for each variable of interest                                                                                                                          |       |
|                          |     | (c) Summarise follow-up time (eg, average and total amount)                                                                                                                                                  | 12    |
| Outcome data             | 15* | Report numbers of outcome events or summary measures over time                                                                                                                                               | 12    |
| Main results             | 16  | (a) Give unadjusted estimates and, if applicable, confounder-adjusted estimates and their precision (eg, 95% confidence interval). Make clear which confounders were adjusted for and why they were included | 12-13 |
|                          |     | (b) Report category boundaries when continuous variables were categorized                                                                                                                                    | 12    |
|                          |     | (c) If relevant, consider translating estimates of relative risk into absolute risk for a meaningful time period                                                                                             | 13    |
| Other analyses           | 17  | Report other analyses done—eg analyses of subgroups and interactions, and sensitivity analyses                                                                                                               | 13    |
| <b>Discussion</b>        |     |                                                                                                                                                                                                              |       |
| Key results              | 18  | Summarise key results with reference to study objectives                                                                                                                                                     | 15-17 |
| <b>Limitations</b>       |     |                                                                                                                                                                                                              |       |
| Interpretation           | 20  | Give a cautious overall interpretation of results considering objectives, limitations, multiplicity of analyses, results from similar studies, and other relevant evidence                                   | 15-17 |
| Generalisability         | 21  | Discuss the generalisability (external validity) of the study results                                                                                                                                        | 17    |
| <b>Other information</b> |     |                                                                                                                                                                                                              |       |
| Funding                  | 22  | Give the source of funding and the role of the funders for the present study and, if applicable, for the original study on which the present article is based                                                |       |

\*Give information separately for cases and controls in case-control studies and, if applicable, for exposed and unexposed groups in cohort and cross-sectional studies.

**Note:** An Explanation and Elaboration article discusses each checklist item and gives methodological background and published examples of transparent reporting. The STROBE checklist is best used in conjunction with this article (freely available on the Web sites of PLoS Medicine at <http://www.plosmedicine.org/>, Annals of Internal Medicine at <http://www.annals.org/>, and Epidemiology at <http://www.epidem.com/>). Information on the STROBE Initiative is available at [www.strobe-statement.org](http://www.strobe-statement.org).
